# Supplementary material for: Synthesis of phthalimides cross-conjugated with an azulene ring, and their structural, optical and electrochemical properties
Source: Royal Society of Chemistry journal article supplement (doi:10.1039/d0ob00164c), 2020-01-01
Supplement: d0ob00164c1.pdf [file d0ob00164c1.pdf]

## **Electronic Supplementary Information (ESI)**

### **Synthesis of Phthalimides Cross-Conjugated with Azulene Ring via Diels-Alder Reaction of 2-Aminofurans with Maleimides, and Their Structural, Optical and Electrochemical Properties**

Taku Shoji,\* Nanami Iida, Akari Yamazaki, Yukino Ariga, Akira Ohta, Ryuta Sekiguchi,  
Tatsuki Nagahata, Takuya Nagasawa, Shunji Ito

#### ➤ **Contents**

- |                                                                                                             |         |
|-------------------------------------------------------------------------------------------------------------|---------|
| 1. Experimental details                                                                                     | S1–S13  |
| 2. Copies of <sup>1</sup> H NMR, <sup>13</sup> C NMR, COSY and HRMS of reported compounds (Figures S1–S48). | S14–S37 |
| 3. UV/Vis and fluorescent spectra of <b>2a–2e</b> and <b>4a–4g</b> (Figures S49–S86).                       | S38–S56 |
| 4. Frontier Kohn–Sham orbitals of compounds <b>2a–2e</b> and <b>4a–4g</b> (Figures S87–S98).                | S57–S72 |
| 5. ORTEP Drawing of <b>2b</b> (Figures S99).                                                                | S73     |

## Compound 2a

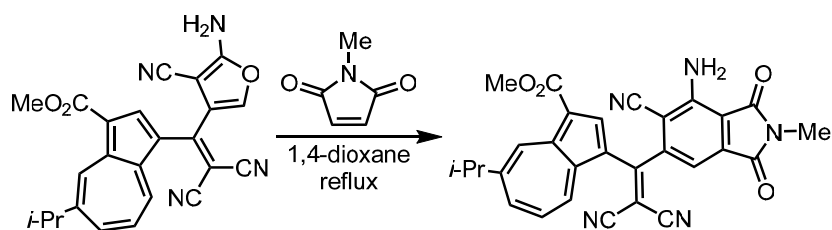

A solution of **1** (100 mg, 0.243 mmol) in *N*-methylmaleimide (55 mg, 0.495 mmol) in 1,4-dioxane (5 mL) was stirred at 140 °C for 23 h under an Ar atmosphere. After the reaction, solvent was removed under reduced pressure. The crude product was purified by silica gel column chromatography with CHCl<sub>3</sub> as an eluent to afford **2a** (49 mg, 0.0973 mmol, 42%) as red solid. M.p. 235–237 °C; IR (AT-IR):  $\nu_{\max}$  = 3448 (w), 3347 (w), 2970 (w), 2211 (m), 1771 (m), 1701 (s), 1627 (m), 1601 (w), 1527 (w), 1511 (m), 1483 (s), 1464 (s), 1439 (s), 1414 (s), 1385 (m), 1361 (s), 1337 (m), 1286 (w), 1245 (m), 1210 (s), 1176 (m), 1127 (m), 1091 (w), 1062 (m), 985 (m), 956 (w), 931 (w), 903 (m), 879 (m), 843 (w), 817 (m), 809 (m), 782 (m), 773 (w), 749 (m), 735 (w), 712 (w), 688 (w), 666 (w), 659 (w) cm<sup>-1</sup>; UV/Vis (CH<sub>2</sub>Cl<sub>2</sub>):  $\lambda_{\max}$  = 250 (4.62), 272 sh (4.47), 300 (4.42), 338 (4.16), 392 sh (4.07), 429 sh (4.22), 458 (4.24), 511 sh (3.92) nm; UV/Vis (10% CF<sub>3</sub>CO<sub>2</sub>H/CH<sub>2</sub>Cl<sub>2</sub>):  $\lambda_{\max}$  = 299 (4.42), 337 sh (4.12), 453 (4.25), 498 sh (4.19), 532 sh (3.97) nm; <sup>1</sup>H NMR (500 MHz, CDCl<sub>3</sub>):  $\delta_{\text{H}}$  = 9.99 (d, 1H, J = 2.0 Hz, H<sub>8</sub>), 8.29 (d, 1H, J = 9.7 Hz, H<sub>4</sub>), 8.17 (s, 1H, H<sub>2</sub>), 8.09 (d, 1H, J = 10.9 Hz, H<sub>6</sub>), 7.86 (t, 1H, J = 10.0 Hz, H<sub>7</sub>), 7.39 (s, 1H, Bz), 6.03 (s, 2H, NH<sub>2</sub>), 3.93 (s, 3H, CO<sub>2</sub>Me), 3.34 (t, 1H, J = 6.9 Hz, *i*-Pr), 3.21 (s, 3H, Me), 1.47 (d, 6H, J = 6.9 Hz, *i*-Pr) ppm; <sup>13</sup>C NMR (125 MHz, CDCl<sub>3</sub>):  $\delta_{\text{C}}$  = 168.4, 166.4, 164.7, 162.7, 156.1, 148.3, 147.3, 146.0, 143.4, 142.2, 142.0, 140.6, 137.3, 136.6, 131.7, 120.6, 118.6, 114.4, 114.2, 113.5, 113.1, 112.9, 102.1, 80.3, 51.7, 39.6, 24.6, 24.3 ppm; HRMS (MALDI-TOF, positive): calcd for C<sub>29</sub>H<sub>21</sub>N<sub>5</sub>O<sub>4</sub><sup>+</sup> [M]<sup>+</sup> 503.1588, found: 503.1618, C<sub>29</sub>H<sub>21</sub>N<sub>5</sub>O<sub>4</sub> + Ag<sup>+</sup> [M + Ag]<sup>+</sup> 610.0639, found: 610.0666.

## Compound 2b

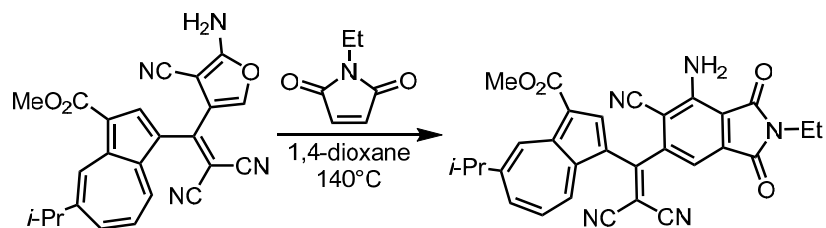

A solution of **1** (803 mg, 1.96 mmol) in *N*-ethylmaleimide (494 mg, 3.95 mmol) in 1,4-dioxane (15 mL) was stirred at 140 °C for 12 h under an Ar atmosphere. After the reaction, solvent was removed under reduced pressure. The crude product was purified by silica gel column chromatography with CHCl<sub>3</sub>/AcOEt (5 : 1) as an eluent to afford **2b** (691 mg, 1.37 mmol, 70%) as red solid. M.p 235–237 °C; IR (AT-IR):  $\nu_{\max}$  = 3482 (w), 3361 (w), 2980 (w), 2218 (w), 1765 (w), 1703 (s), 1630 (m), 1607 (w), 1531 (w), 1496 (s), 1464 (m), 1442 (s), 1417 (m), 1369 (m), 1339 (m), 1299 (w), 1283 (w), 1246 (m), 1211 (m), 1178 (m), 1134 (w), 1113 (w), 1085 (w), 1067 (m), 1054 (w), 1025 (w), 1001 (w), 970 (w), 931 (w), 906 (w), 878 (w), 821 (m), 801 (w), 778 (w), 758 (w), 745 (w), 712 (w), 685 (w), 664 (w) cm<sup>-1</sup>; UV/Vis (CH<sub>2</sub>Cl<sub>2</sub>):  $\lambda_{\max}$  = 249 (4.66), 273 sh (4.51), 299 (4.46), 337 (4.20), 390 sh (4.10), 428 sh (4.26), 456 (4.29), 513 sh (3.94) nm; UV/Vis (10% CF<sub>3</sub>CO<sub>2</sub>H/CH<sub>2</sub>Cl<sub>2</sub>):  $\lambda_{\max}$  = 259 sh (4.58), 300 (4.46), 342 sh (4.16), 454 (4.29), 494 sh (4.23), 530 sh (4.02) nm; <sup>1</sup>H NMR (500 MHz, CDCl<sub>3</sub>):  $\delta_{\text{H}}$  = 9.99 (d, 1H, J = 1.7 Hz, H<sub>8</sub>), 8.30 (d, 1H, J = 10.0 Hz, H<sub>4</sub>), 8.17-8.08 (m, 2H, H<sub>2,6</sub>), 7.86 (t, 1H, J = 10.2 Hz, H<sub>7</sub>), 7.38 (s, 1H, Bz), 6.02 (s, 2H, NH<sub>2</sub>), 3.93 (s, 3H, CO<sub>2</sub>Me), 3.76 (q, 2H, J = 7.2 Hz, Et), 3.34 (sept, 1H, J = 6.9 Hz, *i*-Pr), 1.47 (d, 6H, J = 6.9 Hz, *i*-Pr), 1.32 (t, 3H, J = 7.2 Hz, Et) ppm; <sup>13</sup>C NMR (125 MHz, CDCl<sub>3</sub>):  $\delta_{\text{C}}$  = 168.0, 166.1, 164.5, 162.6, 155.7, 148.0, 147.3, 145.7, 143.3, 142.1, 141.8, 140.2, 137.1, 136.4, 131.5, 120.5, 118.3, 114.2, 114.1, 113.5, 113.0, 112.5, 101.6, 80.0, 51.4, 39.2, 33.2, 24.3, 13.7 ppm; HRMS (MALDI-TOF, positive): calcd for C<sub>30</sub>H<sub>23</sub>N<sub>5</sub>O<sub>4</sub><sup>+</sup> [M]<sup>+</sup> 517.1745, found: 517.1741, C<sub>30</sub>H<sub>23</sub>N<sub>5</sub>O<sub>4</sub> + Ag<sup>+</sup> [M + Ag]<sup>+</sup> 624.0795, found: 624.0768.

## Compound 2c

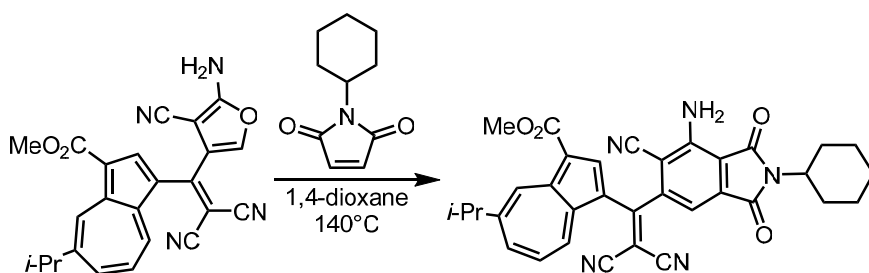

A solution of **1** (21 mg, 0.0511 mmol) in *N*-cyclohexylmaleimide (19 mg, 0.106 mmol) in 1,4-dioxane (5 mL) was stirred at 140 °C for 17.5 h under an Ar atmosphere. After the reaction, solvent was removed under reduced pressure. The crude product was purified by silica gel column chromatography with CHCl<sub>3</sub>/AcOEt (4 : 1) as an eluent to afford **2c** (21 mg, 0.0367 mmol, 72%) as red solid. M.p. 234–236 °C; IR (AT-IR):  $\nu_{\max}$  = 3452 (w), 3354 (w), 2931 (w), 2853 (w), 2221 (w), 1764 (w), 1698 (s), 1634 (s), 1602 (w), 1550 (w), 1506 (s), 1466 (m), 1442 (s), 1420 (m), 1397 (m), 1374 (s), 1329 (s), 1284 (w), 1247 (m), 1221 (s), 1176 (m), 1136 (w), 1111 (w), 1088 (w), 1058 (w), 1010 (w), 953 (w), 895 (m), 804 (w), 774 (w), 756 (m), 733 (w), 714 (w), 697 (w), 673 (w), 664 (w) cm<sup>-1</sup>; UV/Vis (CH<sub>2</sub>Cl<sub>2</sub>):  $\lambda_{\max}$  = 250 (4.60), 275 sh (4.44), 298 (4.41), 337 (4.15), 390 sh (4.04), 427 sh (4.21), 456 (4.25), 513 sh (3.89) nm; UV/Vis (10% CF<sub>3</sub>CO<sub>2</sub>H/CH<sub>2</sub>Cl<sub>2</sub>):  $\lambda_{\max}$  = 264 (4.49), 300 (4.41), 340 (4.10), 455 (4.24), 499 sh (4.16), 538 sh (3.83) nm; <sup>1</sup>H NMR (500 MHz, CDCl<sub>3</sub>):  $\delta_{\text{H}}$  = 9.98 (d, 1H, J = 1.7 Hz, H<sub>8</sub>), 8.31 (d, 1H, J = 10.0 Hz, H<sub>4</sub>), 8.17 (s, 1H, H<sub>2</sub>), 8.09 (d, 1H, J = 100 Hz, H<sub>6</sub>), 7.86 (t, 1H, J = 10.0 Hz, H<sub>5</sub>), 7.35 (s, 1H, Bz), 6.03 (s, 2H, NH<sub>2</sub>), 4.12-4.07 (m, 1H, c-Hex), 3.93 (s, 3H, CO<sub>2</sub>Me), 3.34 (sept, 1H, J = 6.9 Hz, *i*-Pr), 2.22-2.13 (m, 2H, c-Hex), 1.91-1.88 (m, 2H, c-Hex), 1.78-1.71 (m, 3H, c-Hex), 1.47 (d, 6H, J = 6.9 Hz, *i*-Pr), 1.42-1.25 (m, 3H, c-Hex) ppm; <sup>13</sup>C NMR (125 MHz, CDCl<sub>3</sub>):  $\delta_{\text{C}}$  = 168.6, 166.3, 164.7, 162.9, 156.0, 148.1, 147.4, 146.0, 143.5, 142.2, 141.9, 140.6, 137.3, 136.4, 131.7, 120.7, 118.6, 114.3, 114.2, 113.6, 113.2, 112.7, 101.8, 80.3, 51.65, 51.61, 39.5, 30.0, 26.0, 25.1, 24.6 ppm; HRMS (MALDI-TOF, positive): calcd for C<sub>34</sub>H<sub>29</sub>N<sub>5</sub>O<sub>4</sub><sup>+</sup> [M]<sup>+</sup> 571.2214; found: 571.2216, C<sub>34</sub>H<sub>29</sub>N<sub>5</sub>O<sub>4</sub> + Ag<sup>+</sup> [M + Ag]<sup>+</sup> 678.1265; found: 678.1249.

## Compound 2d

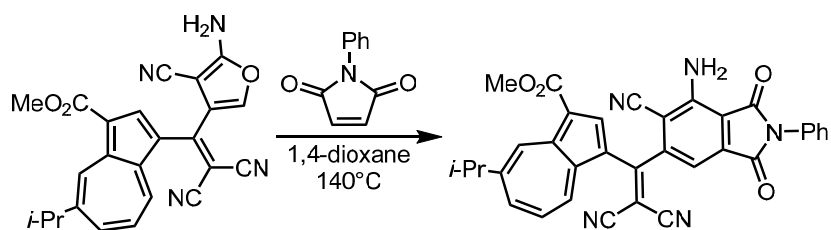

A solution of **1** (102 mg, 0.248 mmol) in *N*-phenylmaleimide (86 mg, 0.496 mmol) in 1,4-dioxane (5 mL) was stirred at 140 °C for 18 h under an Ar atmosphere. After the reaction, solvent was removed under reduced pressure. The crude product was purified by silica gel column chromatography with CHCl<sub>3</sub>/AcOEt (4 : 1) as an eluent to afford **2d** (48 mg, 0.0848 mmol, 34%) as red solid. M.p. 190–191 °C; IR (AT-IR):  $\nu_{\max}$  = 3462 (w), 3361 (w), 2962 (w), 2357 (w), 2220 (w), 1770 (w), 1712 (s), 1632 (s), 1599 (m), 1502 (s), 1466 (m), 1442 (s), 1419 (s), 1385 (s), 1343 (m), 1287 (w), 1219 (s), 1178 (m), 1121 (m), 1095 (m), 1065 (w), 1047 (w), 1003 (w), 963 (w), 878 (m), 810 (w), 778 (m), 758 (m), 735 (m), 713 (w), 690 (m), 677 (w), 660 (w) cm<sup>-1</sup>; UV/Vis (CH<sub>2</sub>Cl<sub>2</sub>):  $\lambda_{\max}$  = 248 (4.66), 298 (4.45), 340 (4.14), 394 sh (4.09), 429 sh (4.22), 457 sh (4.23), 514 sh (3.90) nm; UV/Vis (10% CF<sub>3</sub>CO<sub>2</sub>H/CH<sub>2</sub>Cl<sub>2</sub>):  $\lambda_{\max}$  = 265 (4.54), 300 (4.46), 341 (4.11), 453 (4.25), 496 sh (4.18), 536 sh (3.91) nm; <sup>1</sup>H NMR (500 MHz, CDCl<sub>3</sub>):  $\delta_{\text{H}}$  = 9.99 (d, 1H, *J* = 2.0 Hz, H<sub>8</sub>), 8.33 (d, 1H, *J* = 10.0 Hz, H<sub>4</sub>), 8.21 (s, 1H, H<sub>2</sub>), 8.10 (d, 1H, *J* = 10.9 Hz, H<sub>6</sub>), 7.87 (t, 1H, *J* = 10.2 Hz, H<sub>7</sub>), 7.55–7.52 (m, 3H, Ph), 7.47 (s, 1H, Bz), 7.44 (d, 2H, *J* = 8.3 Hz, , Ph), 6.15 (s, 2H, NH<sub>2</sub>), 3.93 (s, 3H, CO<sub>2</sub>Me), 3.33 (sept, 1H, *J* = 6.9 Hz, *i*-Pr), 1.47 (d, 6H, *J* = 6.9 Hz, *i*-Pr) ppm; <sup>13</sup>C NMR (125 MHz, CDCl<sub>3</sub>):  $\delta_{\text{C}}$  = 167.4, 165.3, 164.7, 162.6, 156.2, 148.8, 147.8, 146.1, 143.4, 142.2, 142.0, 140.7, 137.3, 136.0, 131.8, 130.9, 129.4, 128.7, 126.4, 120.6, 118.7, 114.2, 113.8, 113.6, 113.2, 113.1, 102.3, 80.3, 51.7, 39.6, 24.6 ppm; HRMS (MALDI-TOF, positive): calcd for C<sub>34</sub>H<sub>23</sub>N<sub>5</sub>O<sub>4</sub><sup>+</sup> [M]<sup>+</sup> 565.1745; found: 565.1726, C<sub>34</sub>H<sub>23</sub>N<sub>5</sub>O<sub>4</sub> + Ag<sup>+</sup> [M + Ag]<sup>+</sup> 672.0795, found: 672.0795.

## Compound 2e

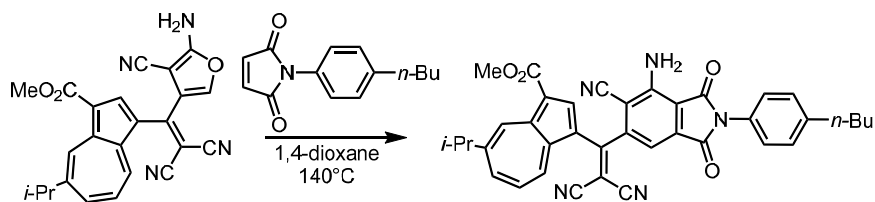

A solution of **1** (16 mg, 0.0389 mmol) in *N-n*-butylmaleimide (18 mg, 0.0785 mmol) in 1,4-dioxane (5 mL) was stirred at 140 °C for 18 h under an Ar atmosphere. After the reaction, solvent was removed under reduced pressure. The crude product was purified by silica gel column chromatography with hexane/AcOEt (4 : 1) as an eluent to afford **2e** (14 mg, 0.0225 mmol, 58%) as red solid. M.p. 192 – 193 °C; IR (AT-IR):  $\nu_{\max}$  = 3468 (w), 3357 (w), 2962 (w), 2218 (m), 1772 (w), 1708 (s), 1626 (m), 1604 (m), 1515 (m), 1486 (m), 1464 (m), 1443 (s), 1419 (s), 1394 (s), 1370 (s), 1337 (m), 1310 (w), 1247 (m), 1226 (s), 1210 (m), 1174 (m), 1138 (m), 1123 (m), 1087 (m), 1065 (m), 1046 (m), 1003 (w), 967 (w), 930 (w), 900 (m), 887 (m), 868 (w), 841 (w), 805 (m), 794 (m), 777 (m), 768 (m), 748 (m), 734 (m), 715 (w), 695 (w), 664 (w)  $\text{cm}^{-1}$ ; UV/Vis ( $\text{CH}_2\text{Cl}_2$ ):  $\lambda_{\max}$  = 249 (4.71), 271 sh (4.58), 301 (4.52), 342 sh (4.28), 385 sh (4.12), 438 (4.36), 512 sh (3.80) nm; UV/Vis (10%  $\text{CF}_3\text{CO}_2\text{H}/\text{CH}_2\text{Cl}_2$ ):  $\lambda_{\max}$  = 264 (4.61), 300 (4.52), 343 sh (4.16), 400 sh (4.12), 454 (4.32), 498 sh (4.24), 535 sh (3.99) nm;  $^1\text{H}$  NMR (500 MHz,  $\text{CDCl}_3$ ):  $\delta_{\text{H}}$  = 10.00 (d, 1H,  $J$  = 1.7 Hz,  $\text{H}_8$ ), 8.33 (d, 1H,  $J$  = 10.0 Hz,  $\text{H}_4$ ), 8.19 (s, 1H,  $\text{H}_2$ ), 8.11 (d, 1H,  $J$  = 10.9 Hz,  $\text{H}_6$ ), 7.89 (t, 1H,  $J$  = 10.2 Hz,  $\text{H}_7$ ), 7.48 (s, 1H, Bz), 7.31-7.35 (m, 4H, *p-n*-BuPh), 6.14 (s, 2H,  $\text{NH}_2$ ), 3.93 (s, 3H,  $\text{CO}_2\text{Me}$ ), 3.34 (sept, 1H,  $J$  = 6.9 Hz, *i*-Pr), 2.68 (t, 2H,  $J$  = 7.7 Hz, *n*-Bu), 1.67-1.61 (m, 2H, *n*-Bu), 1.47 (d, 6H,  $J$  = 6.9 Hz, *i*-Pr), 1.39 (m, 2H, *n*-Bu), 0.95 (t, 3H,  $J$  = 7.3 Hz, *n*-Bu) ppm;  $^{13}\text{C}$  NMR (125 MHz,  $\text{CDCl}_3$ ):  $\delta_{\text{C}}$  = 167.5, 165.4, 164.7, 162.6, 156.2, 148.6, 147.7, 146.0, 143.8, 143.4, 142.2, 142.1, 140.6, 137.3, 136.1, 131.8, 129.4, 128.2, 126.2, 120.6, 118.6, 114.2, 113.9, 113.6, 113.1, 102.2, 80.1, 51.7, 39.5, 35.5, 33.5, 24.6, 22.4, 14.1 ppm; HRMS (MALDI-TOF, positive): calcd for  $\text{C}_{38}\text{H}_{31}\text{N}_5\text{O}_4^+$  [ $\text{M}$ ] $^+$  621.2371; found: 621.2373,  $\text{C}_{38}\text{H}_{31}\text{N}_5\text{O}_4 + \text{Ag}^+$  [ $\text{M} + \text{Ag}$ ] $^+$  728.1421; found:

728.1430.

## Compound 4a

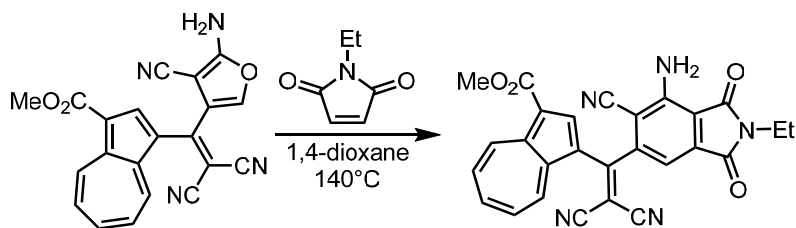

A solution of **3a** (154 mg, 0.418 mmol) in *N*-ethylmaleimide (105 mg, 0.839 mmol) in 1,4-dioxane (10 mL) was stirred at 140 °C for 16.5 h under an Ar atmosphere. After the reaction, solvent was removed under reduced pressure. The crude product was purified by silica gel column chromatography with CHCl<sub>3</sub>/AcOEt (4 : 1) as an eluent to afford **4a** (109 mg, 0.229 mmol, 55%) as red solid. M.p. 186–189 °C; IR (AT-IR):  $\nu_{\max}$  = 3566 (w), 3446 (w), 3354 (w), 2951 (w), 2223 (w), 1763 (w), 1697 (s), 1629 (s), 1602 (w), 1536 (w), 1507 (m), 1444 (m), 1422 (m), 1401 (s), 1372 (m), 1336 (m), 1248 (w), 1209 (s), 1183 (m), 1158 (w), 1065 (m), 1042 (w), 1020 (m), 907 (m), 875 (w), 814 (w), 780 (m), 755 (m), 708 (w), 689 (w), 676 (w), 668 (w), 657 (w) cm<sup>-1</sup>; UV/Vis (CH<sub>2</sub>Cl<sub>2</sub>):  $\lambda_{\max}$  = 248 (4.66), 298 (4.41), 333 (4.14), 438 (4.22), 485 sh (3.91) nm; UV/Vis (10% CF<sub>3</sub>CO<sub>2</sub>H/CH<sub>2</sub>Cl<sub>2</sub>):  $\lambda_{\max}$  = 300 (4.41), 335 (4.11), 447 (4.24), 495 sh (3.99) nm; <sup>1</sup>H NMR (500 MHz, CDCl<sub>3</sub>):  $\delta_{\text{H}}$  = 9.91 (d, 1H, J = 10.0 Hz, H<sub>8</sub>), 8.43 (d, 1H, J = 9.7 Hz, H<sub>4</sub>), 8.20 (s, 1H, H<sub>2</sub>), 8.16 (t, 1H, J = 9.7 Hz, H<sub>6</sub>), 7.97 (t, 1H, J = 9.9 Hz, H<sub>7</sub>), 7.91 (t, 1H, J = 9.7 Hz, H<sub>5</sub>), 7.39 (s, 1H, Bz), 6.04 (s, 2H, NH<sub>2</sub>), 3.93 (s, 3H, CO<sub>2</sub>Me), 3.76 (q, 2H, J = 7.2 Hz, Et), 1.31 (t, 3H, J = 7.2 Hz, Et) ppm; <sup>13</sup>C NMR (125 MHz, CDCl<sub>3</sub>):  $\delta_{\text{C}}$  = 168.2, 166.1, 164.5, 163.1, 148.0, 147.3, 145.8, 143.2, 142.8, 142.1, 140.9, 138.8, 136.6, 133.3, 131.8, 121.6, 119.4, 114.5, 113.9, 113.3, 113.1, 112.7, 101.8, 81.7, 51.8, 33.5, 14.0 ppm; HRMS (MALDI-TOF, positive): calcd for C<sub>27</sub>H<sub>17</sub>N<sub>5</sub>O<sub>4</sub><sup>+</sup> [M]<sup>+</sup> 475.1275; found: 475.1268, C<sub>27</sub>H<sub>17</sub>N<sub>5</sub>O<sub>4</sub> + Ag<sup>+</sup> [M + Ag]<sup>+</sup> 582.0326; found: 582.0351.



## Compound 4b

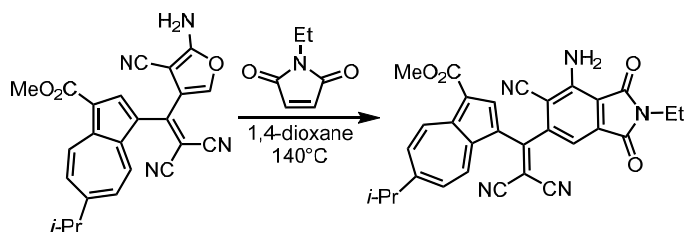

A solution of **3b** (298 mg, 0.726 mmol) in *N*-ethylmaleimide (185 mg, 1.47 mmol) in 1,4-dioxane (15 mL) was stirred at 140 °C for 18 h under an Ar atmosphere. After the reaction, solvent was removed under reduced pressure. The crude product was purified by silica gel column chromatography with toluene/AcOEt (4 : 1) as an eluent to afford **4b** (311 mg, 0.600 mmol, 83%) as red solid. M.p. 179–181 °C; IR (AT-IR):  $\nu_{\max}$  = 3491 (w), 3365 (w), 2960 (w), 2223 (w), 1763 (w), 1706 (s), 1628 (m), 1601 (w), 1585 (w), 1540 (w), 1506 (m), 1445 (m), 1424 (m), 1401 (m), 1374 (m), 1332 (m), 1242 (w), 1209 (s), 1134 (w), 1082 (w), 1065 (w), 1053 (m), 1035 (w), 1019 (w), 903 (w), 855 (w), 815 (w), 790 (w), 775 (w), 757 (w), 734 (w), 703 (w), 692 (w), 682 (w), 664 (w)  $\text{cm}^{-1}$ ; UV/Vis ( $\text{CH}_2\text{Cl}_2$ ):  $\lambda_{\max}$  = 249 (4.57), 275 sh (4.41), 306 (4.51), 338 (4.17), 440 (4.23), 496 sh (3.95) nm; UV/Vis (10%  $\text{CF}_3\text{CO}_2\text{H}/\text{CH}_2\text{Cl}_2$ ):  $\lambda_{\max}$  = 308 (4.52), 342 sh (4.13), 450 (4.23), 486 sh (4.16), 514 sh (4.02) nm;  $^1\text{H}$  NMR (500 MHz,  $\text{CDCl}_3$ ):  $\delta_{\text{H}}$  = 9.78 (d, 1H,  $J$  = 10.6 Hz,  $\text{H}_8$ ), 8.32 (d, 1H,  $J$  = 10.3 Hz,  $\text{H}_4$ ), 8.13 (s, 1H,  $\text{H}_2$ ), 7.87 (dd, 1H,  $J$  = 10.6, 1.4 Hz,  $\text{H}_7$ ), 7.80 (dd, 1H,  $J$  = 10.6, 1.7 Hz,  $\text{H}_5$ ), 7.36 (s, 1H, Bz), 6.08 (s, 2H,  $\text{NH}_2$ ), 3.90 (s, 3H,  $\text{CO}_2\text{Me}$ ), 3.73 (q, 2H,  $J$  = 7.2 Hz, Et), 3.25 (sept, 1H,  $J$  = 6.9 Hz,  $i$ -Pr), 1.41 (d, 6H,  $J$  = 6.9 Hz,  $i$ -Pr), 1.29 (t, 3H,  $J$  = 7.2 Hz, Et) ppm;  $^{13}\text{C}$  NMR (125 MHz,  $\text{CDCl}_3$ ):  $\delta_{\text{C}}$  = 168.2, 166.6, 166.1, 164.5, 162.9, 148.1, 147.3, 144.6, 142.1, 140.9, 140.3, 138.4, 136.5, 132.7, 131.3, 121.3, 119.1, 114.2, 114.1, 113.5, 113.1, 112.6, 101.7, 80.4, 51.6, 40.0, 33.4, 24.2, 13.9 ppm; HRMS (MALDI-TOF, positive): calcd for  $\text{C}_{30}\text{H}_{23}\text{N}_5\text{O}_4^+$   $[\text{M}]^+$  517.1745, found: 517.1760,  $\text{C}_{30}\text{H}_{23}\text{N}_5\text{O}_4 + \text{Ag}^+$   $[\text{M} + \text{Ag}]^+$  624.0795, found: 624.0791.

## Compound 4c

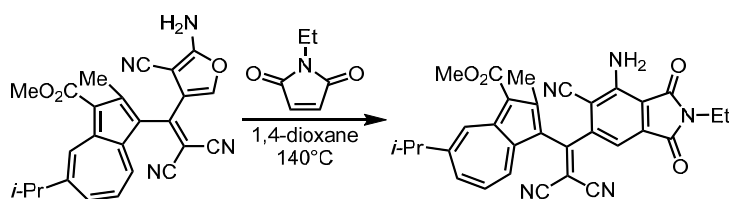

A solution of **3c** (308 mg, 0.725 mmol) in *N*-ethylmaleimide (183 mg, 1.46 mmol) in 1,4-dioxane (10 mL) was stirred at 140 °C for 16.5 h under an Ar atmosphere. After the reaction, solvent was removed under reduced pressure. The crude product was purified by silica gel column chromatography with hexane/AcOEt (4 : 1) as an eluent to afford **4c** (366 mg, 0.688 mmol, 95%) as red solid. M.p. 224 – 226 °C; IR (AT-IR):  $\nu_{\max}$  = 3455 (w), 3336 (w), 2959 (w), 2230 (w), 1762 (w), 1698 (s), 1684 (s), 1627 (m), 1598 (w), 1535 (w), 1493 (m), 1435 (s), 1422 (s), 1402 (m), 1381 (m), 1337 (m), 1283 (w), 1248 (w), 1226 (m), 1200 (m), 1144 (w), 1086 (m), 1065 (w), 1047 (w), 1030 (w), 994 (w), 973 (w), 955 (w), 903 (w), 876 (w), 851 (w), 809 (w), 779 (w), 760 (m), 741 (w), 727 (w), 708 (w), 688 (w), 670 (w), 660 (w)  $\text{cm}^{-1}$ ; UV/Vis ( $\text{CH}_2\text{Cl}_2$ ):  $\lambda_{\max}$  = 252 (4.60), 275 sh (4.50), 306 (4.55), 383 (4.00), 431 (4.05), 489 (3.97), 537 sh (3.73) nm; UV/Vis (10%  $\text{CF}_3\text{CO}_2\text{H}/\text{CH}_2\text{Cl}_2$ ):  $\lambda_{\max}$  = 306 (4.55), 368 sh (4.02), 446 (4.04), 501 (3.99), 535 sh (3.88) nm;  $^1\text{H}$  NMR (500 MHz,  $\text{CDCl}_3$ ):  $\delta_{\text{H}}$  = 9.79 (s, 1H, H<sub>8</sub>), 8.02 (d, 1H, J = 10.0 Hz, H<sub>4</sub>), 7.91 (d, 1H, J = 10.3 Hz, H<sub>6</sub>), 7.67 (t, 1H, J = 10.0 Hz, H<sub>7</sub>), 7.38 (s, 1H, Bz), 6.03 (s, 2H, NH<sub>2</sub>), 3.98 (s, 3H, CO<sub>2</sub>Me), 3.73 (q, 2H, J = 7.2 Hz, Et), 3.27 (sept, 1H, J = 6.9 Hz, *i*-Pr), 2.58 (s, 3H), 1.43 (d, 6H, J = 6.9 Hz, *i*-Pr), 1.29 (t, 3H, J = 7.2 Hz, Et) ppm;  $^{13}\text{C}$  NMR (125 MHz,  $\text{CDCl}_3$ ):  $\delta_{\text{C}}$  = 168.1, 166.1, 165.9, 163.6, 154.9, 154.5, 147.8, 147.4, 145.0, 141.9, 139.9, 138.7, 136.2, 134.3, 131.1, 122.2, 117.7, 114.3, 113.7, 113.4, 113.2, 113.0, 101.9, 85.3, 51.5, 39.6, 33.5, 24.6, 17.5, 13.9 ppm; HRMS (MALDI-TOF, positive): calcd for  $\text{C}_{31}\text{H}_{25}\text{N}_5\text{O}_4^+$  [M]<sup>+</sup> 531.1901, found: 531.1901,  $\text{C}_{31}\text{H}_{25}\text{N}_5\text{O}_4 + \text{Ag}^+$  [M + Ag]<sup>+</sup> 638.0952, found: 638.0960.

## Compound 4d

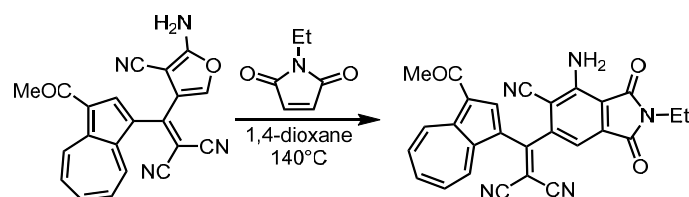

A solution of **3d** (129 mg, 0.366 mmol) in *N*-ethylmaleimide (92 mg, 0.735 mmol) in 1,4-dioxane (5 mL) was stirred at 140 °C for 15.5 h under an Ar atmosphere. After the reaction, solvent was removed under reduced pressure. The crude product was purified by silica gel column chromatography with hexane/AcOEt (4 : 1) as an eluent to afford **4d** (90 mg, 0.194 mmol, 54%) as red solid. M.p. 186–189 °C; IR (AT-IR):  $\nu_{\max}$  = 3455 (w), 3336 (w), 2959 (w), 2230 (w), 1762 (w), 1698 (s), 1684 (s), 1627 (m), 1598 (w), 1535 (w), 1493 (m), 1435 (s), 1422 (s), 1402 (m), 1381 (m), 1337 (m), 1283 (w), 1248 (w), 1226 (m), 1200 (m), 1144 (w), 1086 (m), 1065 (w), 1047 (w), 1030 (w), 994 (w), 973 (w), 955 (w), 903 (w), 876 (w), 851 (w), 809 (w), 779 (w), 760 (m), 741 (w), 727 (w), 708 (w), 688 (w), 670 (w), 660 (w)  $\text{cm}^{-1}$ ; UV/Vis ( $\text{CH}_2\text{Cl}_2$ ):  $\lambda_{\max}$  = 249 (4.51), 297 (4.30), 340 (3.99), 392 sh (3.93), 431 sh (4.06), 452 (4.08), 509 sh (3.78) nm; UV/Vis (10%  $\text{CF}_3\text{CO}_2\text{H}/\text{CH}_2\text{Cl}_2$ ):  $\lambda_{\max}$  = 258 (4.50), 310 (4.38), 348 sh (4.10), 382 (4.05), 446 (4.26) nm;  $^1\text{H}$  NMR (500 MHz,  $\text{CDCl}_3$ ):  $\delta_{\text{H}}$  = 10.08 (d, 1H,  $J$  = 10.0 Hz,  $\text{H}_8$ ), 8.27-8.31 (m, 2H,  $\text{H}_{2,4}$ ), 8.10 (t, 1H,  $J$  = 9.6 Hz,  $\text{H}_6$ ), 7.94 (t, 1H,  $J$  = 9.9 Hz,  $\text{H}_7$ ), 7.82 (t, 1H,  $J$  = 9.7 Hz,  $\text{H}_4$ ), 7.39 (s, 1H, Bz), 6.10 (s, 2H,  $\text{NH}_2$ ), 3.73 (q, 2H,  $J$  = 7.1 Hz, Et), 2.64 (s, 3H, COMe), 1.29 (t, 3H,  $J$  = 7.0 Hz, Et) ppm;  $^{13}\text{C}$  NMR (125 MHz,  $\text{CDCl}_3$ ):  $\delta_{\text{C}}$  = 195.2, 168.1, 166.1, 162.9, 147.7, 147.4, 145.2, 143.1, 142.7, 142.6, 138.6, 136.7, 134.5, 132.2, 126.7, 121.3, 114.6, 114.0, 113.2, 113.1, 112.6, 101.7, 81.9, 33.5, 29.3, 13.9 ppm, one signal is overlapped with other signal; HRMS (MALDI-TOF, positive): calcd for  $\text{C}_{27}\text{H}_{17}\text{N}_5\text{O}_3 + \text{H}^+$  [ $\text{M} + \text{H}$ ] $^+$  460.1404, found: 460.1398,  $\text{C}_{27}\text{H}_{17}\text{N}_5\text{O}_3 + \text{Ag}^+$  [ $\text{M} + \text{Ag}$ ] $^+$  566.0377, found: 566.0363.

## Compound 4e

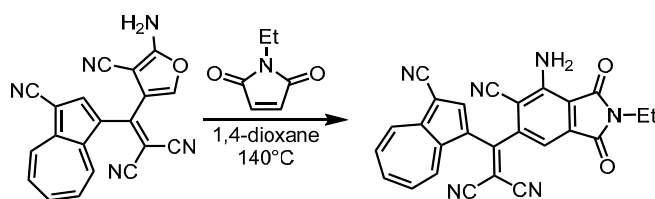

A solution of **3e** (128 mg, 0.381 mmol) in *N*-ethylmaleimide (96 mg, 0.767 mmol) in 1,4-dioxane (5 mL) was stirred at 140 °C for 16.5 h under an Ar atmosphere. After the reaction, solvent was removed under reduced pressure. The crude product was purified by silica gel column chromatography with hexane/AcOEt (4 : 1) as an eluent to afford **4e** (89 mg, 0.201 mmol, 53%) as red solid. M.p. 268–269 °C; IR (AT-IR):  $\nu_{\max}$  = 3425 (w), 3332 (w), 3257 (w), 3222 (w), 3093 (w), 2979 (w), 2221 (w), 2211 (m), 1764 (w), 1709 (s), 1641 (s), 1601 (w), 1578 (w), 1530 (w), 1506 (m), 1467 (w), 1453 (m), 1432 (m), 1399 (m), 1362 (m), 1328 (s), 1305 (w), 1238 (w), 1206 (w), 1173 (m), 1098 (w), 1065 (m), 1017 (w), 978 (w), 906 (m), 891 (w), 850 (w), 819 (w), 807 (w), 781 (w), 758 (s), 728 (w), 701 (w), 691 (w), 682 (w), 666 (w), 659 (w)  $\text{cm}^{-1}$ ; UV/Vis ( $\text{CH}_2\text{Cl}_2$ ):  $\lambda_{\max}$  = 246 (4.63), 293 (4.44), 326 (4.20), 347 sh (4.07), 435 (4.31), 518 sh (3.32) nm; UV/Vis (10%  $\text{CF}_3\text{CO}_2\text{H}/\text{CH}_2\text{Cl}_2$ ):  $\lambda_{\max}$  = 292 (4.45), 327 (4.15), 445 (4.31) nm;  $^1\text{H}$  NMR (500 MHz,  $\text{CDCl}_3$ ):  $\delta_{\text{H}}$  = 8.90 (d, 1H,  $J$  = 9.7 Hz,  $\text{H}_8$ ), 8.47 (d, 1H,  $J$  = 10.0 Hz,  $\text{H}_4$ ), 8.25 (t, 1H,  $J$  = 9.9 Hz,  $\text{H}_6$ ), 8.02–7.96 (m, 3H,  $\text{H}_{2,5,7}$ ), 7.39 (s, 1H, Bz), 6.06 (s, 2H,  $\text{NH}_2$ ), 3.76 (q, 2H,  $J$  = 7.2 Hz, Et), 1.31 (t, 3H,  $J$  = 7.2 Hz, Et) ppm;  $^{13}\text{C}$  NMR (125 MHz,  $\text{CDCl}_3$ ):  $\delta_{\text{C}}$  = 168.1, 165.9, 162.3, 147.4, 147.3, 147.2, 143.7, 142.6, 139.8, 139.7, 139.5, 136.8, 132.6, 132.4, 122.3, 115.1, 114.8, 113.5, 113.0, 112.8, 112.5, 101.5, 101.1, 83.5, 33.6, 14.0 ppm; HRMS (MALDI-TOF, positive): calcd for  $\text{C}_{26}\text{H}_{14}\text{N}_6\text{O}_2 + \text{H}^+$   $[\text{M} + \text{H}]^+$  443.1251, found: 443.1224,  $\text{C}_{26}\text{H}_{14}\text{N}_6\text{O}_2 + \text{Ag}^+$   $[\text{M} + \text{Ag}]^+$  549.0224, found: 549.0206.

## Compound 4f

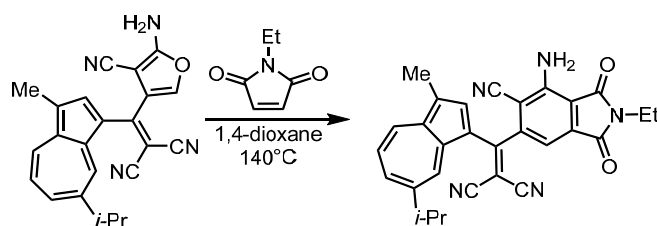

A solution of **3f** (58 mg, 0.158 mmol) in *N*-ethylmaleimide (39 mg, 0.311 mmol) in 1,4-dioxane (5 mL) was stirred at 140 °C for 17 h under an Ar atmosphere. After the reaction, solvent was removed under reduced pressure. The crude product was purified by silica gel column chromatography with toluene/AcOEt (5 : 1) as an eluent to afford **4f** (36 mg, 0.0760 mmol, 48%) as purple solid. m.p. 270–271 °C; IR (AT-IR):  $\nu_{\max}$  = 3440 (w), 3327 (w), 3224 (w), 2967 (w), 2934 (w), 2214 (m), 1765 (w), 1706 (s), 1642 (s), 1602 (w), 1509 (w), 1490 (s), 1465 (m), 1432 (s), 1409 (s), 1380 (s), 1355 (m), 1328 (m), 1303 (m), 1294 (m), 1268 (w), 1247 (w), 1205 (m), 1172 (w), 1140 (w), 1097 (w), 1070 (m), 1035 (w), 954 (w), 930 (w), 906 (m), 871 (m), 806 (w), 794 (w), 779 (w), 757 (m), 739 (w), 712 (w), 685 (w), 673 (w), 661 (w)  $\text{cm}^{-1}$ ; UV/Vis ( $\text{CH}_2\text{Cl}_2$ ):  $\lambda_{\max}$  = 247 (4.63), 300 (4.27), 343 (4.05), 345 (4.05), 417 (4.13), 507 (4.17), 557 sh (3.97) nm; UV/Vis (10%  $\text{CF}_3\text{CO}_2\text{H}/\text{CH}_2\text{Cl}_2$ ):  $\lambda_{\max}$  = 262 (4.48), 291 (4.42), 340 sh (4.13), 378 sh (4.03), 441 (4.03), 529 (4.03), 560 sh (4.02), 600 sh (3.87) nm;  $^1\text{H}$  NMR (500 MHz,  $\text{CDCl}_3$ ):  $\delta_{\text{H}}$  = 8.32 (d, 1H,  $J$  = 9.2 Hz,  $\text{H}_8$ ), 8.05 (d, 1H,  $J$  = 1.4 Hz,  $\text{H}_4$ ), 7.84 (d, 1H,  $J$  = 10.3 Hz,  $\text{H}_6$ ), 7.74 (s, 1H,  $\text{H}_2$ ), 7.59 (t, 1H,  $J$  = 10.0 Hz,  $\text{H}_7$ ), 6.02 (s, 2H,  $\text{NH}_2$ ), 3.75 (q, 2H,  $J$  = 7.2 Hz, Et), 3.10 (t, 1H,  $J$  = 6.9 Hz, *i*-Pr), 2.56 (s, 3H, Me), 1.30 (t, 3H,  $J$  = 7.2 Hz, Et), 1.26 (d, 6H,  $J$  = 6.9 Hz, *i*-Pr) ppm;  $^{13}\text{C}$  NMR (125 MHz,  $\text{CDCl}_3$ ):  $\delta_{\text{C}}$  = 168.3, 166.2, 160.6, 151.7, 149.5, 147.2, 146.0, 141.2, 1140.34, 140.25, 136.9, 136.3, 135.0, 129.5, 129.4, 121.2, 115.5, 114.8, 113.8, 113.2, 102.5, 75.2, 39.3, 33.4, 24.8, 14.0, 12.7 ppm; HRMS (MALDI-TOF, positive): calcd for  $\text{C}_{29}\text{H}_{23}\text{N}_5\text{O}_2 + \text{H}^+$   $[\text{M} + \text{H}]^+$  473.1846, found: 473.1848,  $\text{C}_{29}\text{H}_{23}\text{N}_5\text{O}_2 + \text{Ag}^+$   $[\text{M} + \text{Ag}]^+$  580.0897, found: 580.0914.

## Compound 4g

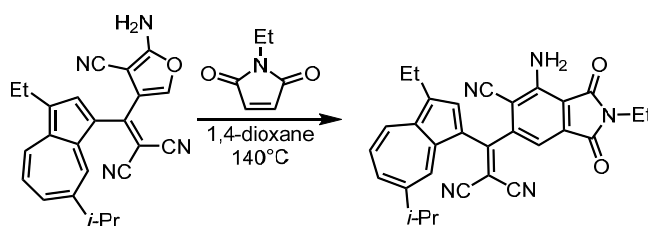

A solution of **3g** (298 mg, 0.783 mmol) in *N*-ethylmaleimide (197 mg, 1.57 mmol) in 1,4-dioxane (10 mL) was stirred at 140 °C for 16 h under an Ar atmosphere. After the reaction, solvent was removed under reduced pressure. The crude product was purified by silica gel column chromatography with toluene/AcOEt (5 : 1) as an eluent to afford **4g** (200 mg, 0.410 mmol, 52%) as purple solid. M.p. 244 °C; IR (AT-IR):  $\nu_{\max}$  = 3422 (w), 3326 (w), 3218 (w), 2962 (w), 2214 (m), 1765 (w), 1707 (s), 1634 (s), 1603 (w), 1543 (w), 1482 (m), 1459 (m), 1429 (s), 1405 (s), 1362 (s), 1336 (m), 1309 (w), 1253 (w), 1200 (w), 1092 (w), 1066 (m), 1022 (w), 926 (w), 904 (w), 878 (w), 850 (w), 800 (w), 757 (m), 739 (w), 712 (w), 688 (w), 673 (w), 665 (w), 657 (w)  $\text{cm}^{-1}$ ; UV/Vis ( $\text{CH}_2\text{Cl}_2$ ):  $\lambda_{\max}$  = 246 (4.63), 298 (4.27), 341 (4.05), 345 (4.05), 418 (4.12), 507 (4.15), 574 sh (3.86) nm; UV/Vis (10%  $\text{CF}_3\text{CO}_2\text{H}/\text{CH}_2\text{Cl}_2$ ):  $\lambda_{\max}$  = 292 (4.48), 346 (4.15), 374 sh (4.09), 440 sh (3.89), 497 (3.98), 561 sh (3.81), 598 sh (3.66) nm;  $^1\text{H}$  NMR (500 MHz,  $\text{CDCl}_3$ ):  $\delta_{\text{H}}$  = 8.36 (d, 1H,  $J$  = 9.7 Hz,  $\text{H}_8$ ), 8.06 (d, 1H,  $J$  = 1.4 Hz,  $\text{H}_4$ ), 7.84 (d, 1H,  $J$  = 10.3 Hz,  $\text{H}_6$ ), 7.77 (s, 1H,  $\text{H}_2$ ), 7.58 (t, 1H,  $J$  = 9.9 Hz,  $\text{H}_7$ ), 7.36 (s, 1H, Bz), 6.03 (s, 2H,  $\text{NH}_2$ ), 3.75 (q, 2H,  $J$  = 7.2 Hz, Et), 3.10 (sept, 1H,  $J$  = 6.9 Hz, *i*-Pr), 2.98 (q, 2H,  $J$  = 7.5 Hz, Et), 1.35 (t, 3H,  $J$  = 7.5 Hz, Et), 1.30 (t, 2H,  $J$  = 7.2 Hz, Et), 1.26 (d, 5H,  $J$  = 6.9 Hz, *i*-Pr) ppm;  $^{13}\text{C}$  NMR (125 MHz,  $\text{CDCl}_3$ ):  $\delta_{\text{C}}$  = 168.3, 166.2, 160.7, 151.7, 149.5, 147.2, 145.1, 141.3, 140.4, 138.6, 136.9, 136.3, 136.0, 134.7, 129.4, 121.3, 115.5, 114.8, 113.8, 113.1, 102.5, 75.3, 39.3, 33.4, 24.7, 20.2, 14.7, 14.0 ppm; HRMS (MALDI-TOF, positive): calcd for  $\text{C}_{30}\text{H}_{25}\text{N}_5\text{O}_2^+$   $[\text{M}]^+$  487.2003, found: 487.2004,  $\text{C}_{30}\text{H}_{25}\text{N}_5\text{O}_2 + \text{Ag}^+$   $[\text{M} + \text{Ag}]^+$  594.1054, found: 594.1081.

1. Copies of  $^1\text{H}$  NMR,  $^{13}\text{C}$  NMR, COSY and HRMS of reported compounds (Figures S1–S48).

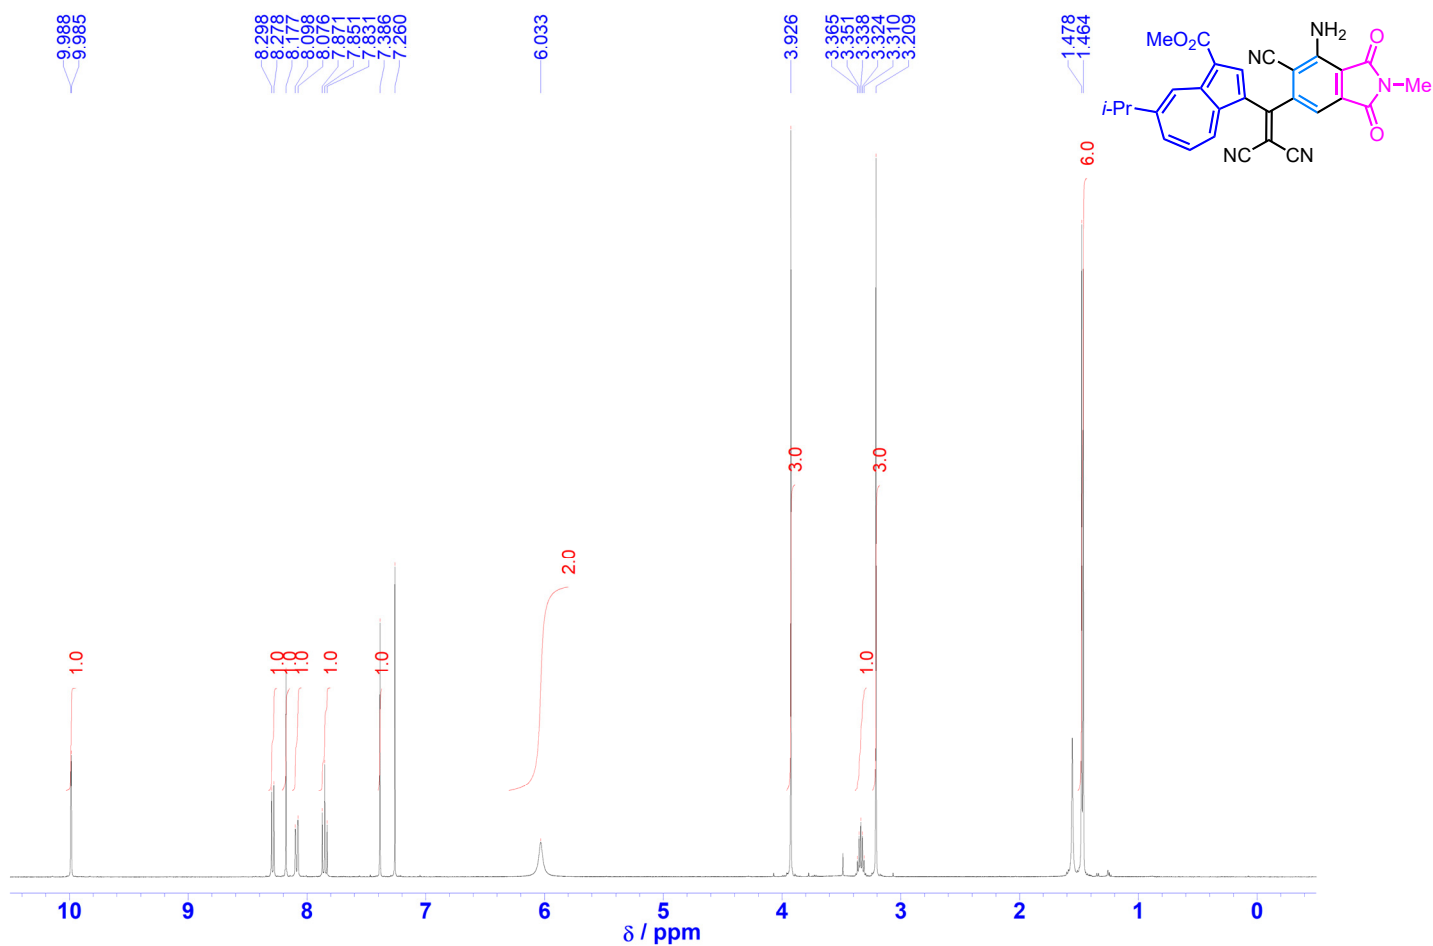

Figure S1.  $^1\text{H}$  NMR spectrum of **2a** in  $\text{CDCl}_3$  (500 MHz).

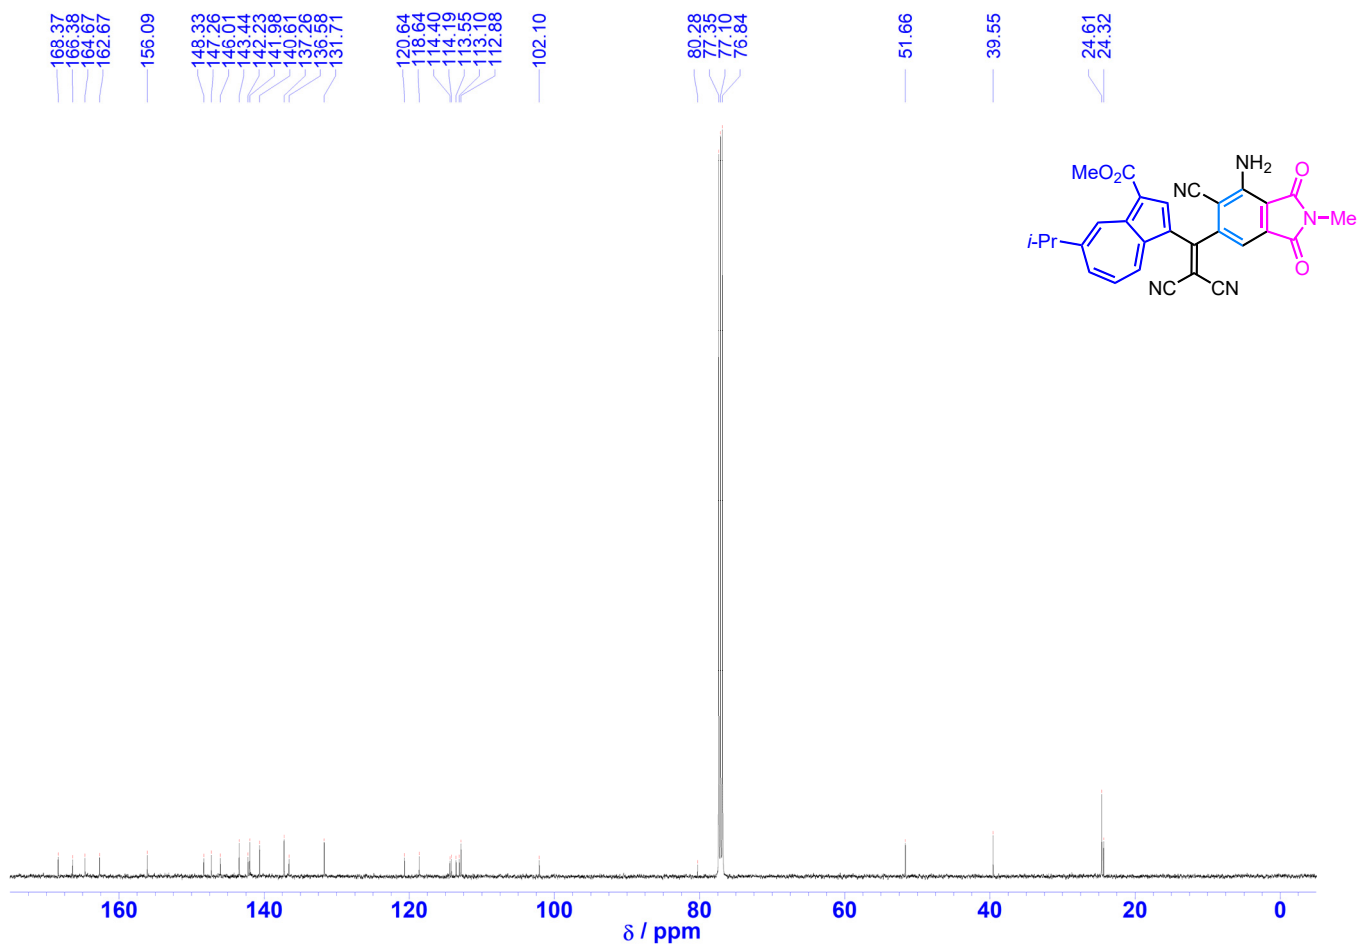

Figure S2.  $^{13}\text{C}$  NMR spectrum of **2a** in  $\text{CDCl}_3$  (125 MHz).

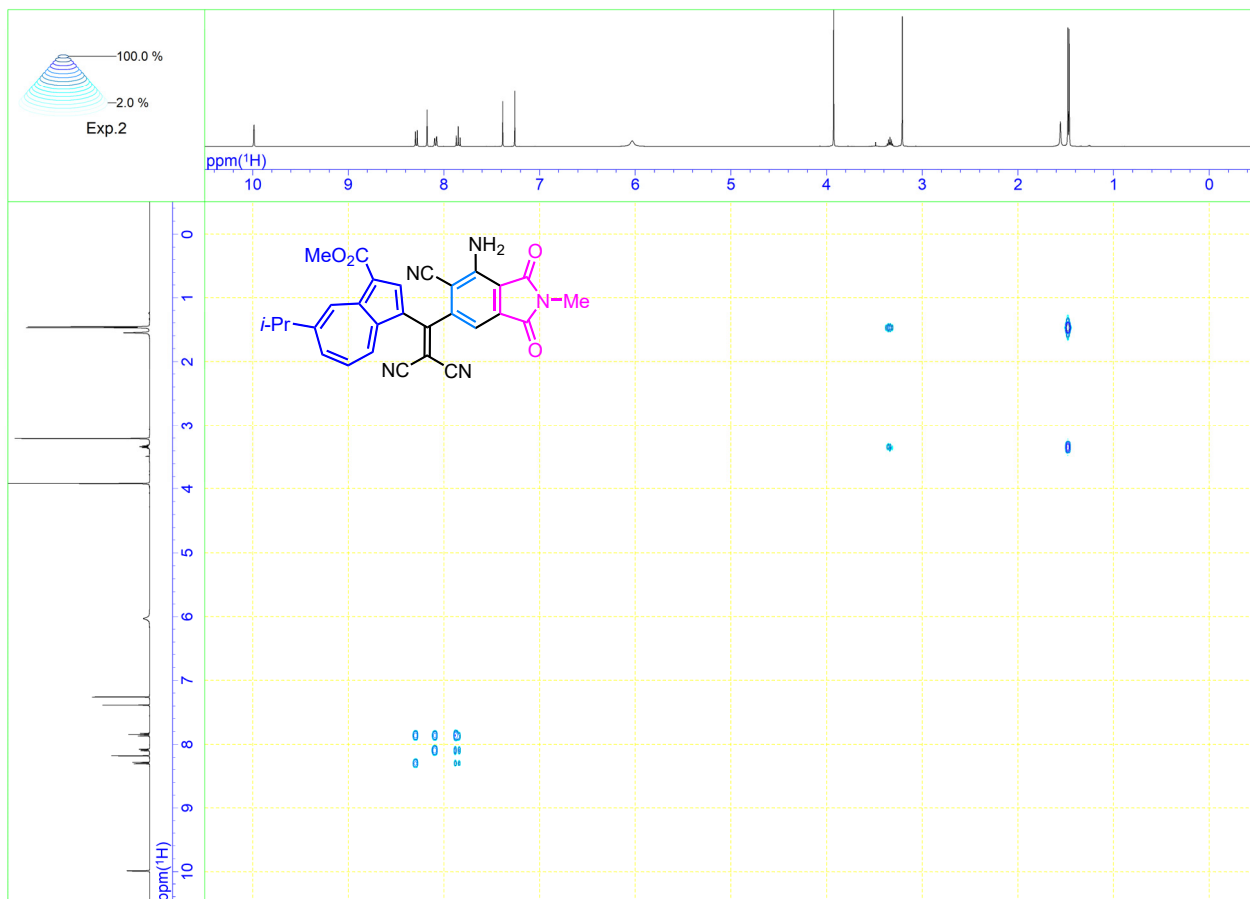

**Figure S3.** COSY spectrum of **2a** in CDCl<sub>3</sub> (500 MHz).

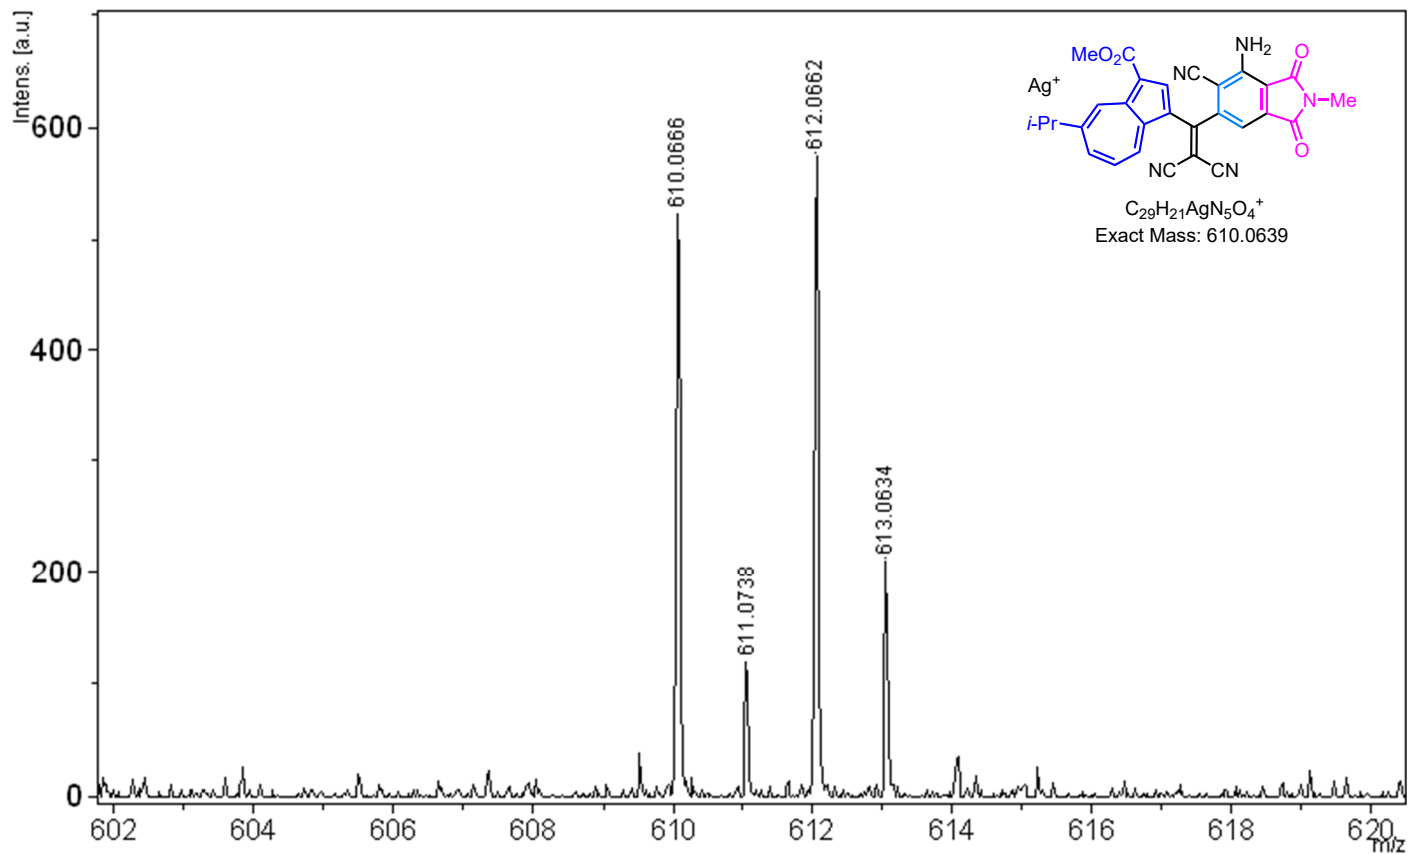

**Figure S4.** HRMS (MALDI-TOF, positive) of **2a**.



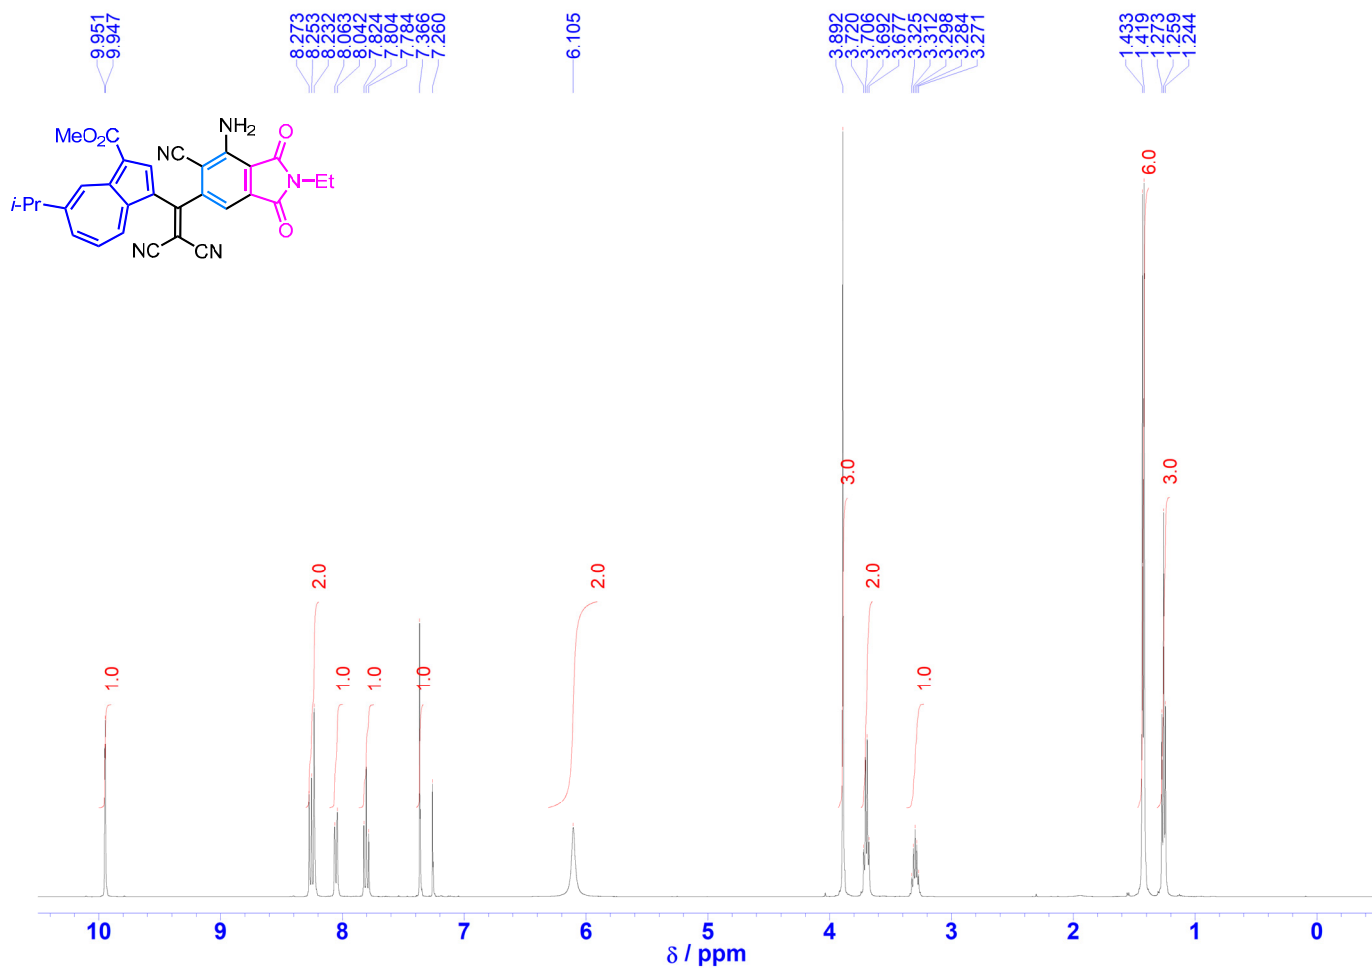

Figure S5. <sup>1</sup>H NMR spectrum of **2b** in CDCl<sub>3</sub> (500 MHz).

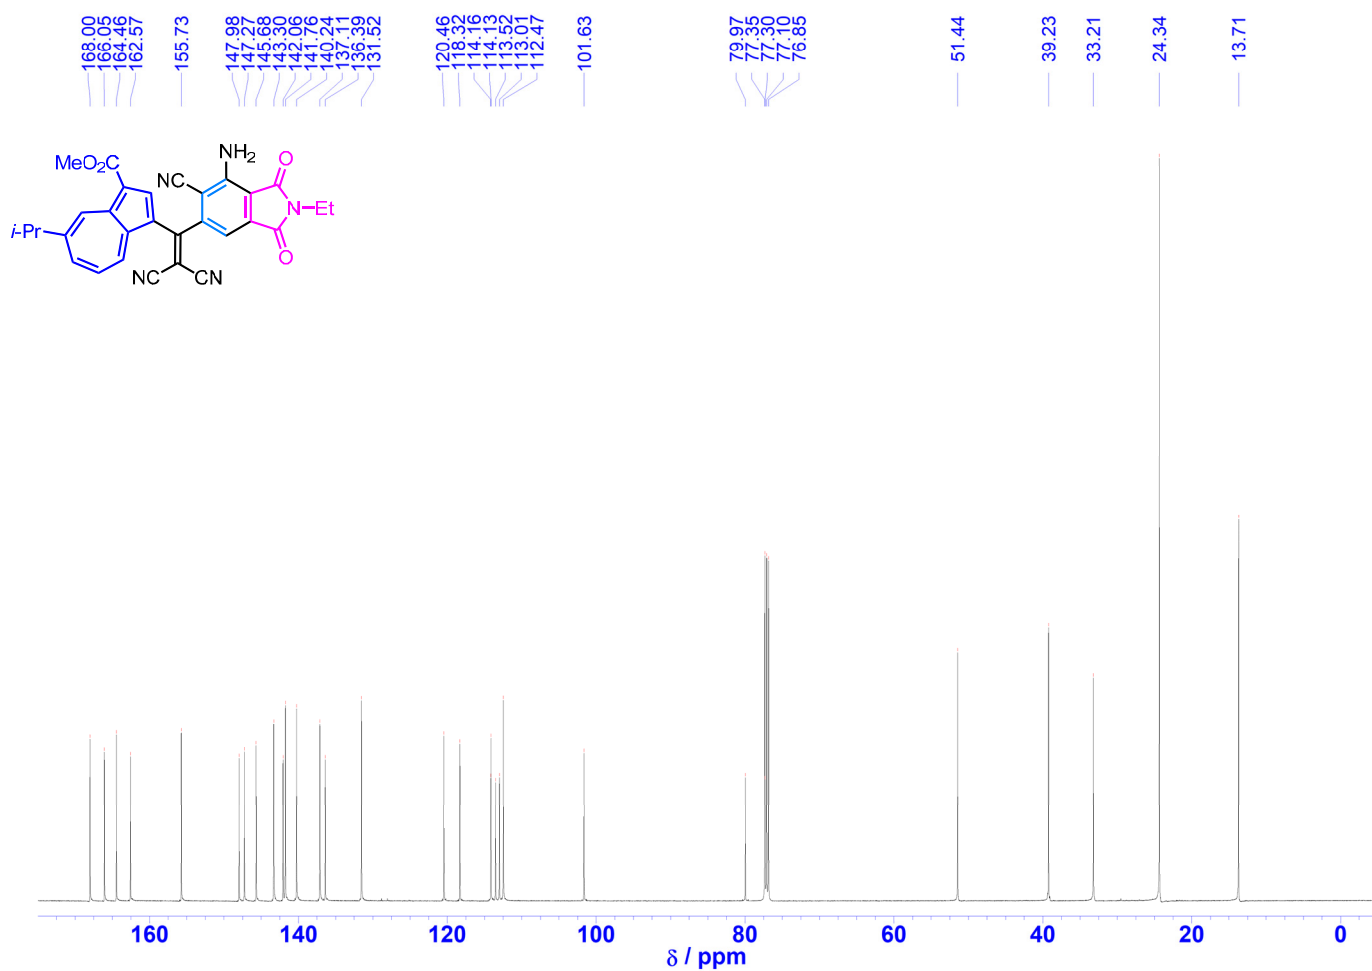

Figure S6. <sup>13</sup>C NMR spectrum of **2b** in CDCl<sub>3</sub> (125 MHz).

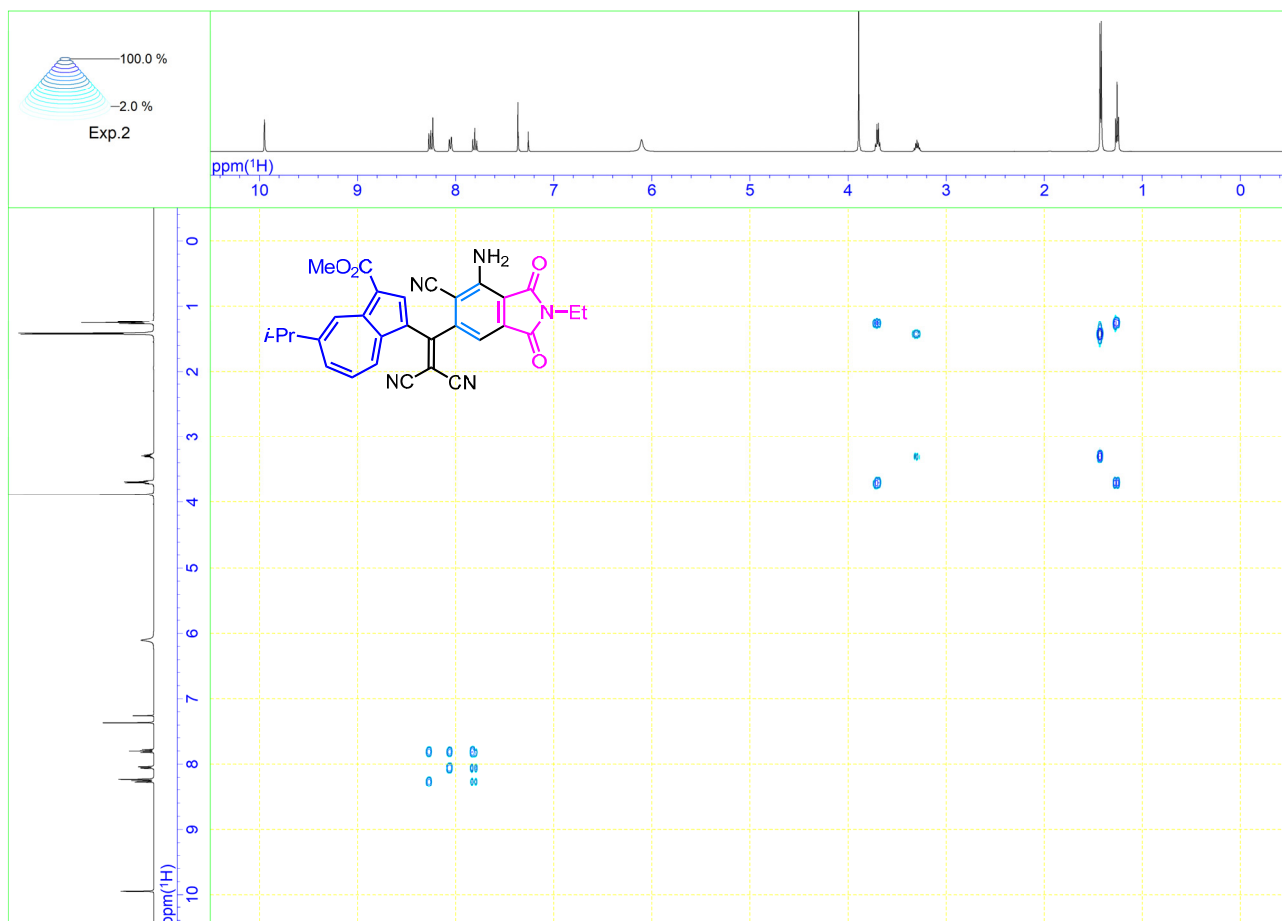

**Figure S7.** COSY spectrum of **2b** in CDCl<sub>3</sub> (500 MHz).

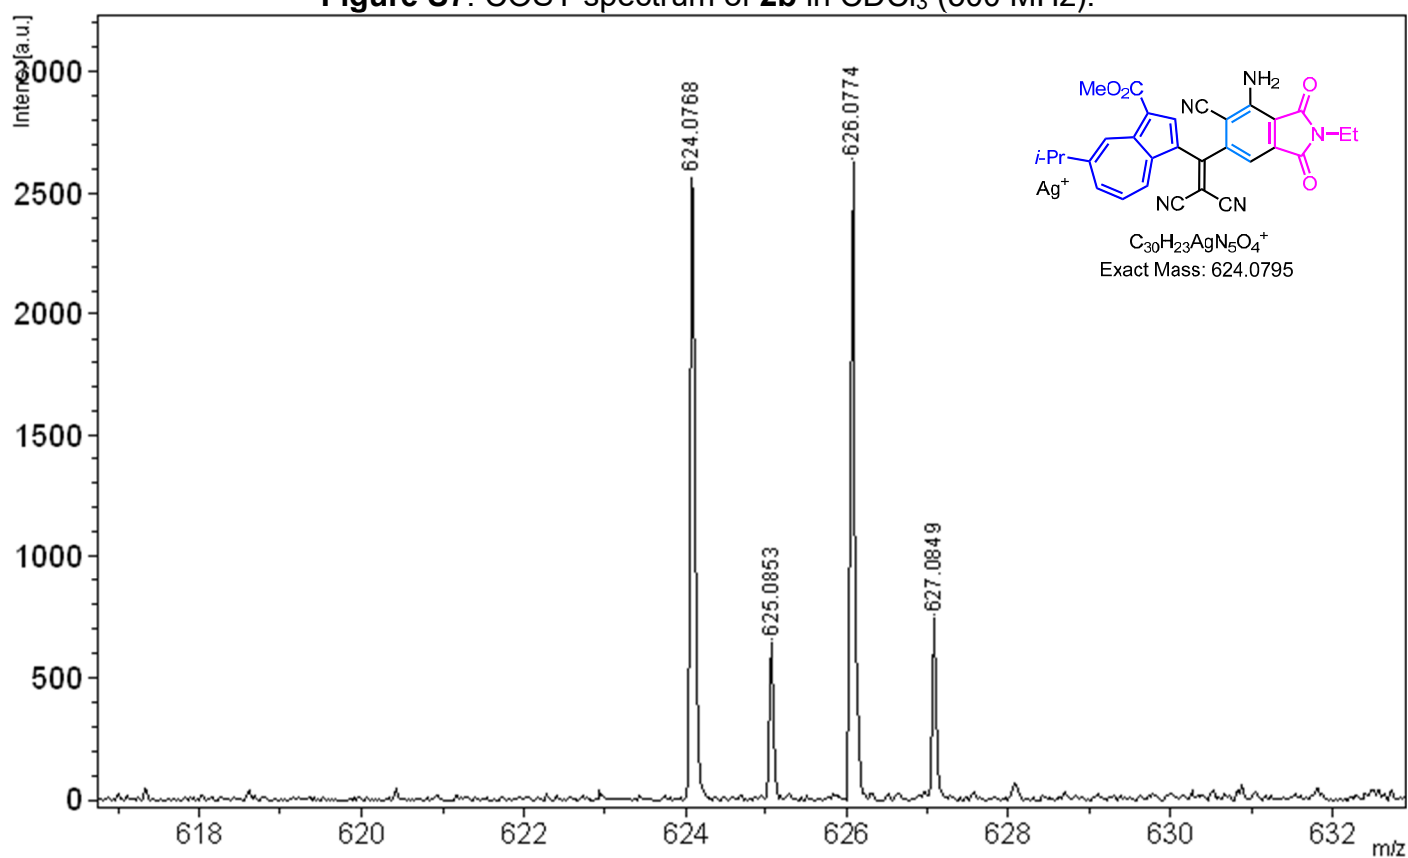

**Figure S8.** HRMS (MALDI-TOF, positive) of **2b**.

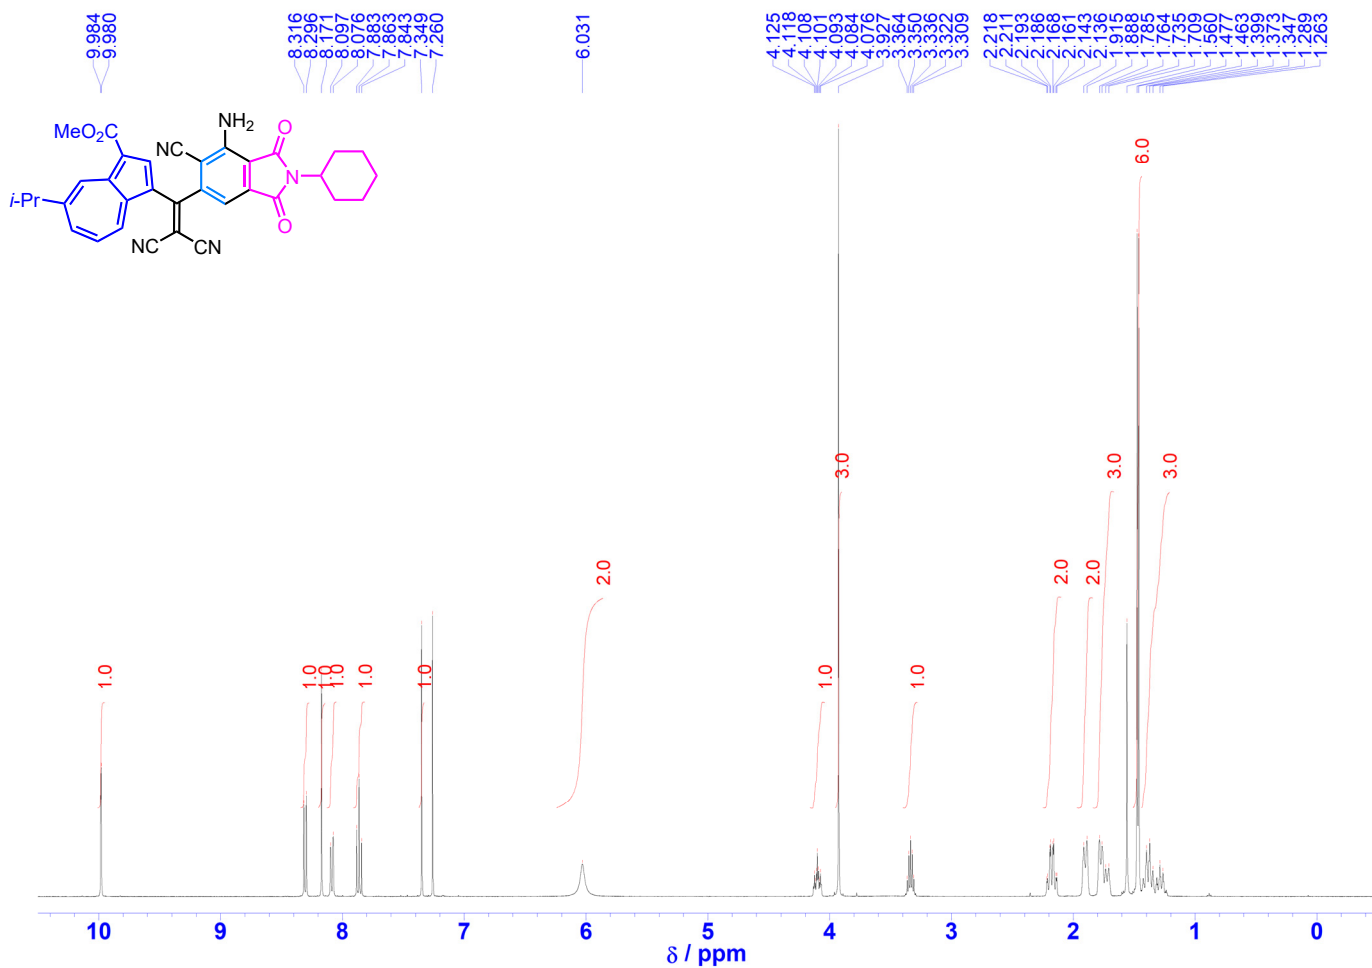

Figure S9. <sup>1</sup>H NMR spectrum of **2c** in CDCl<sub>3</sub> (500 MHz).

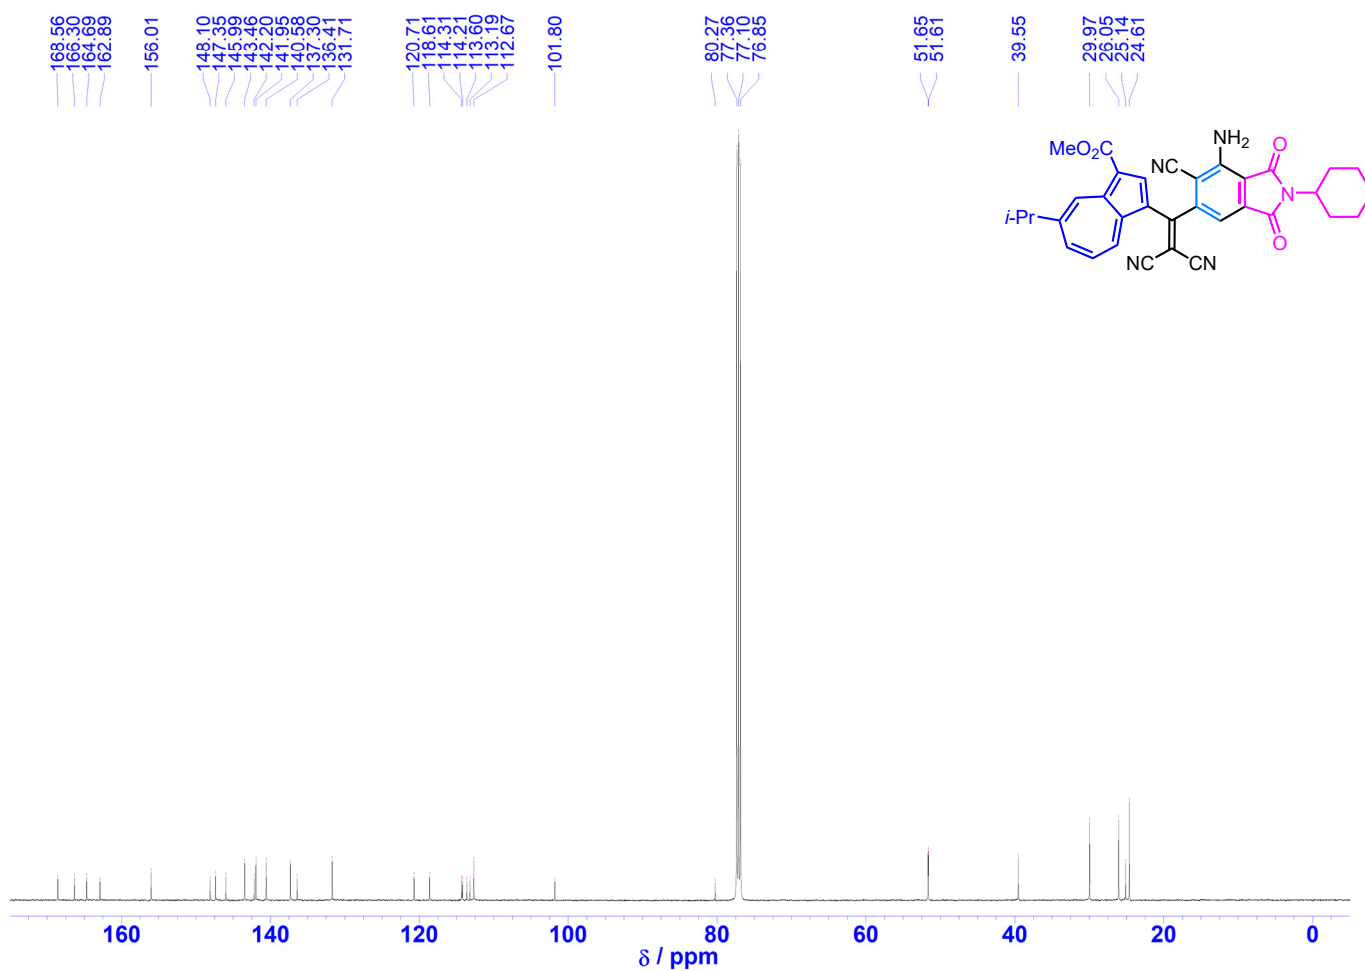

Figure S10. <sup>13</sup>C NMR spectrum of **2c** in CDCl<sub>3</sub> (125 MHz).

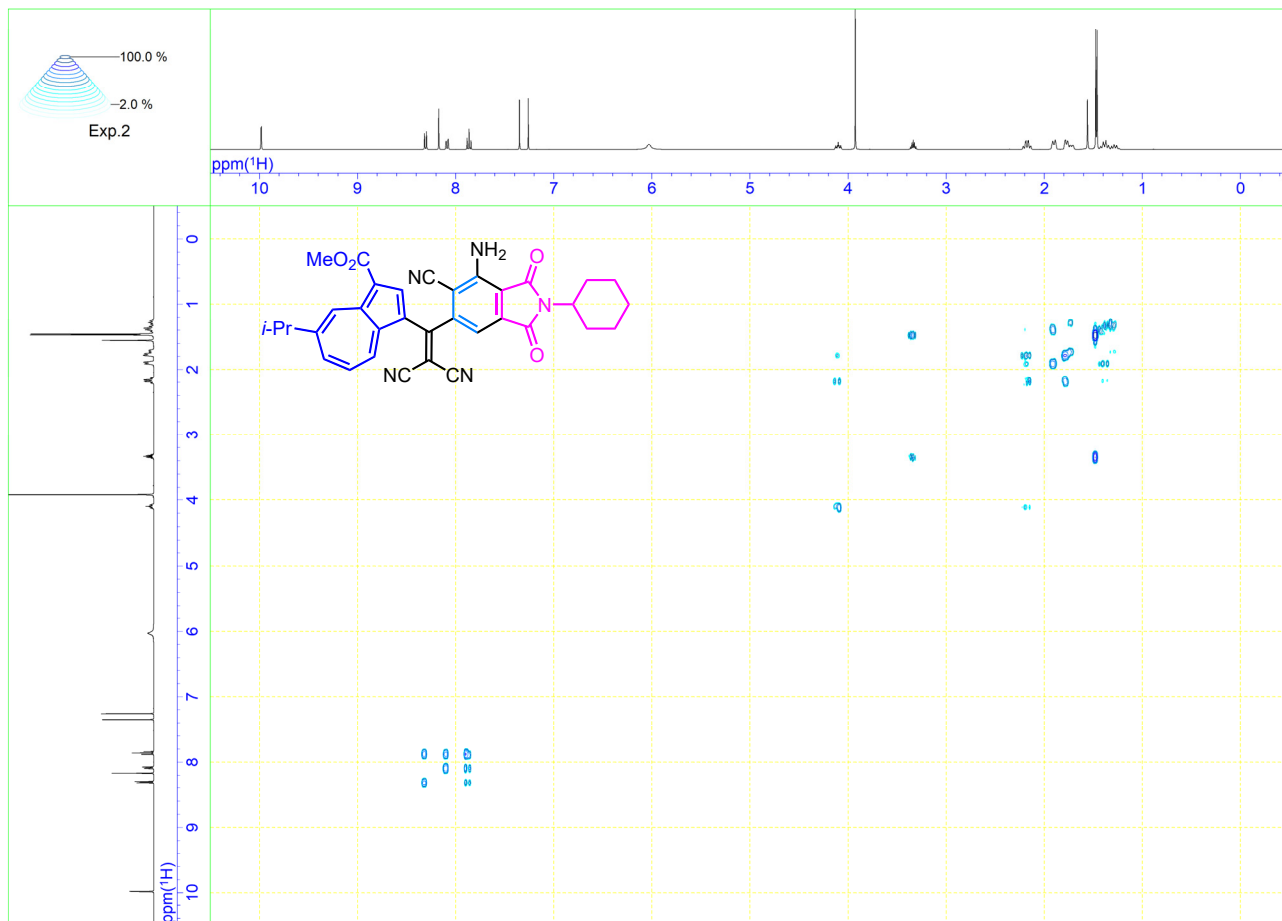

**Figure S11.** COSY spectrum of **2c** in CDCl<sub>3</sub> (500 MHz).

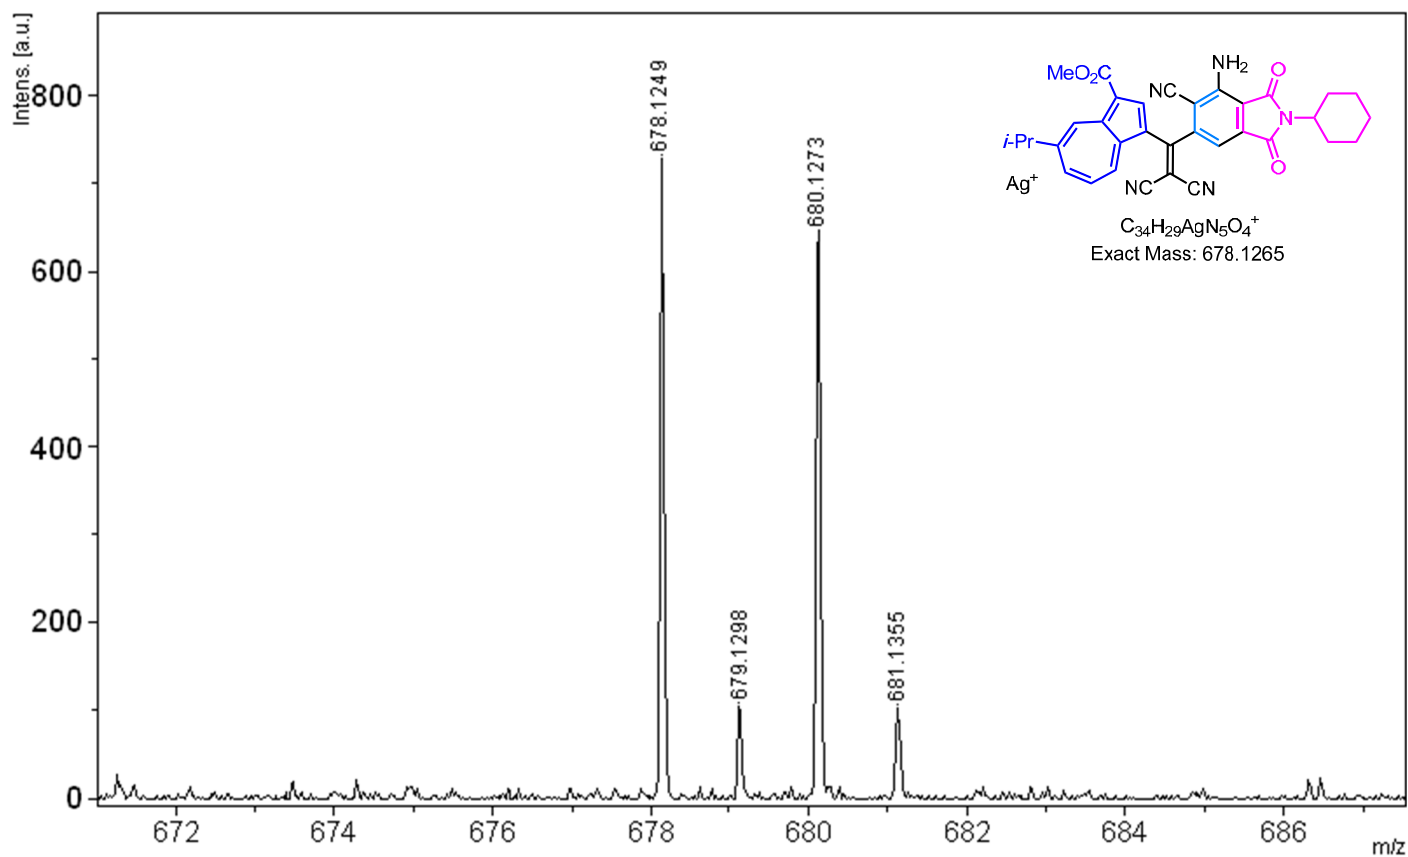

**Figure S12.** HRMS (MALDI-TOF, positive) of **2c**.

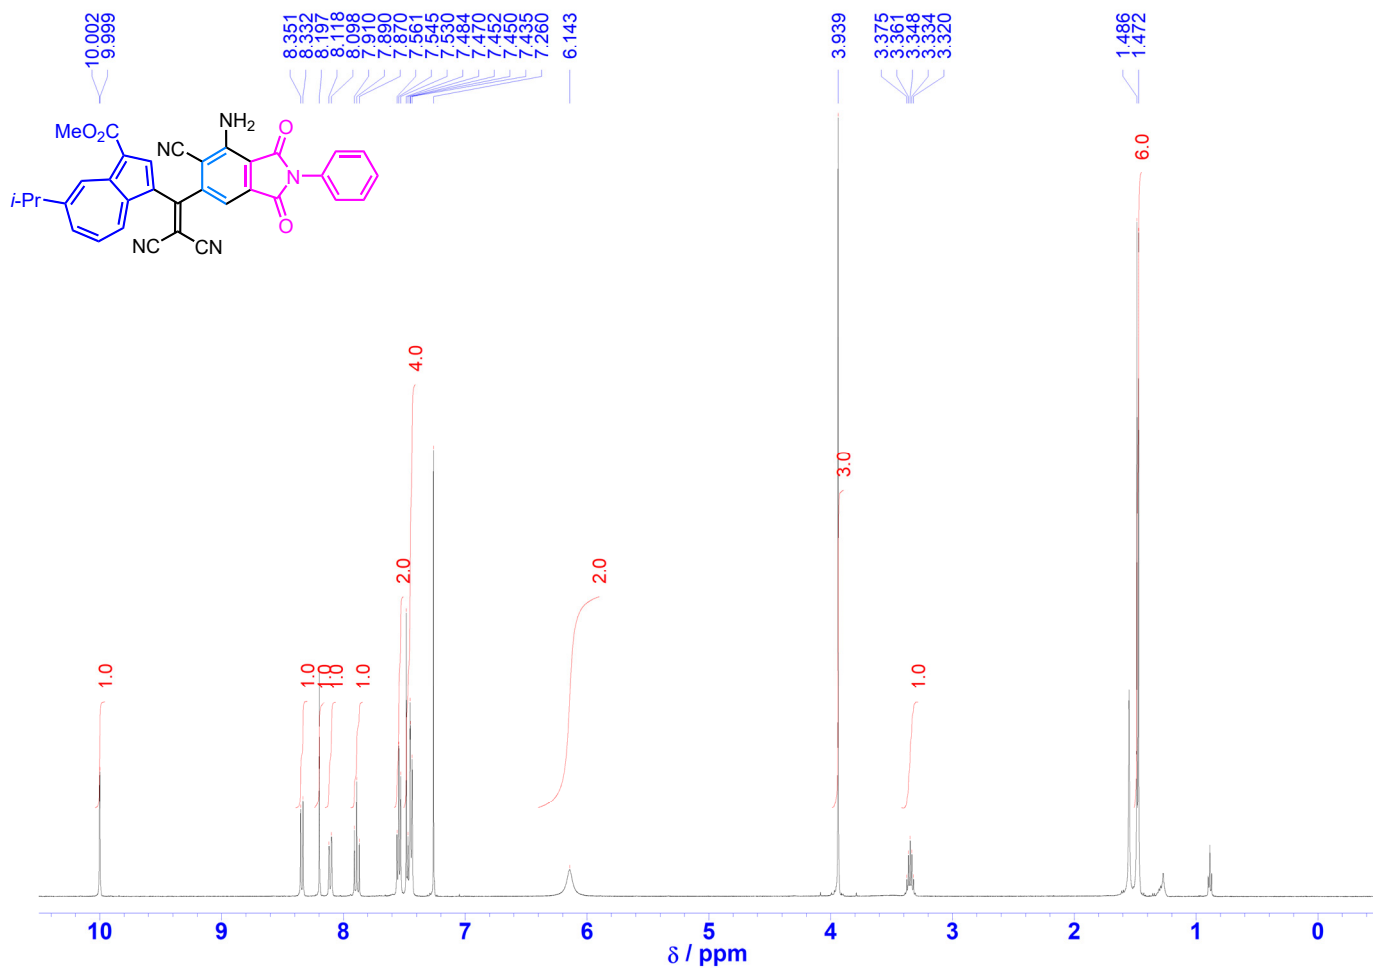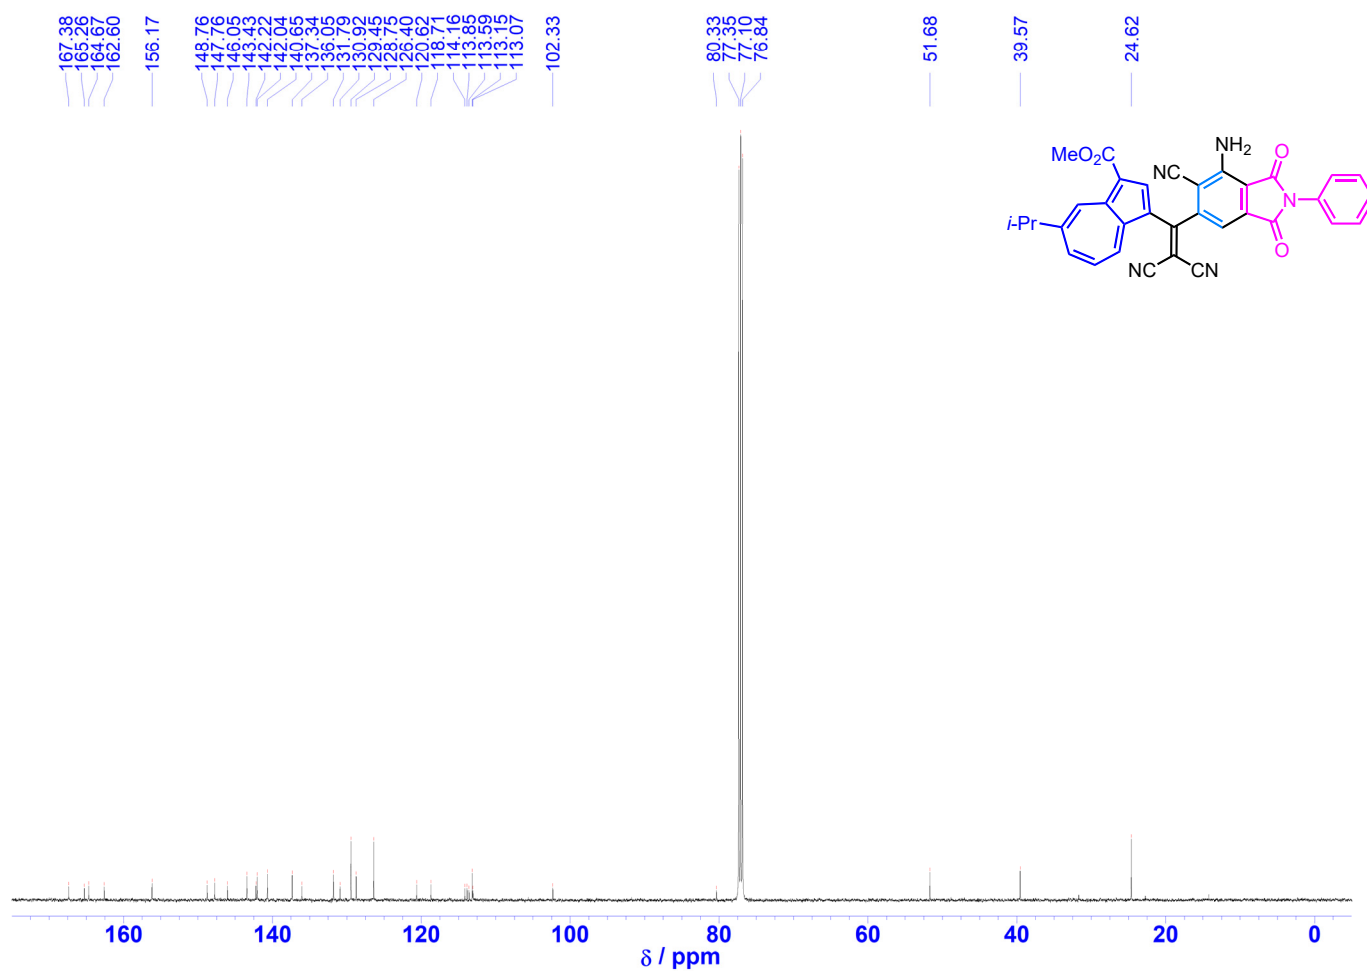

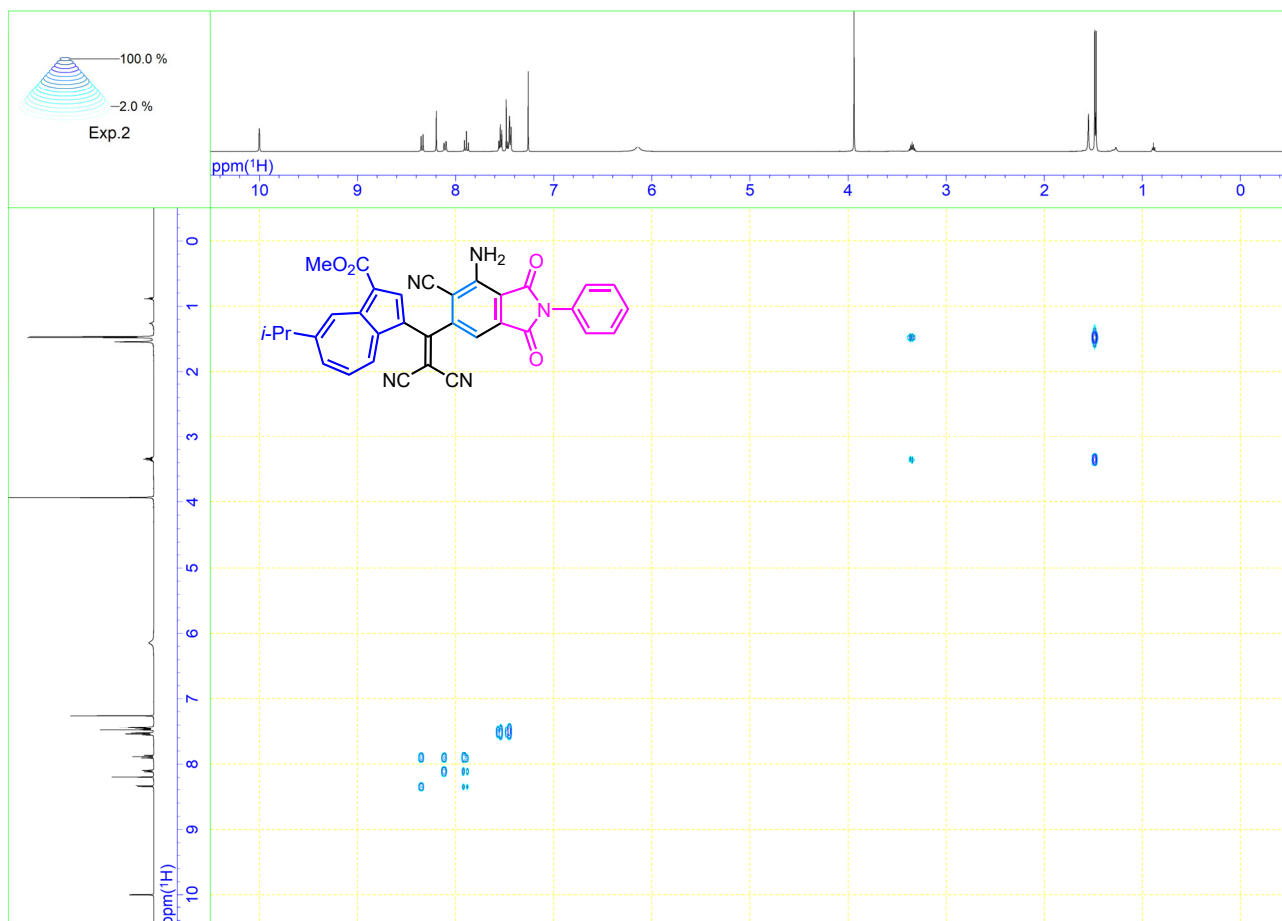

Figure S15. COSY spectrum of **2d** in CDCl<sub>3</sub> (500 MHz).

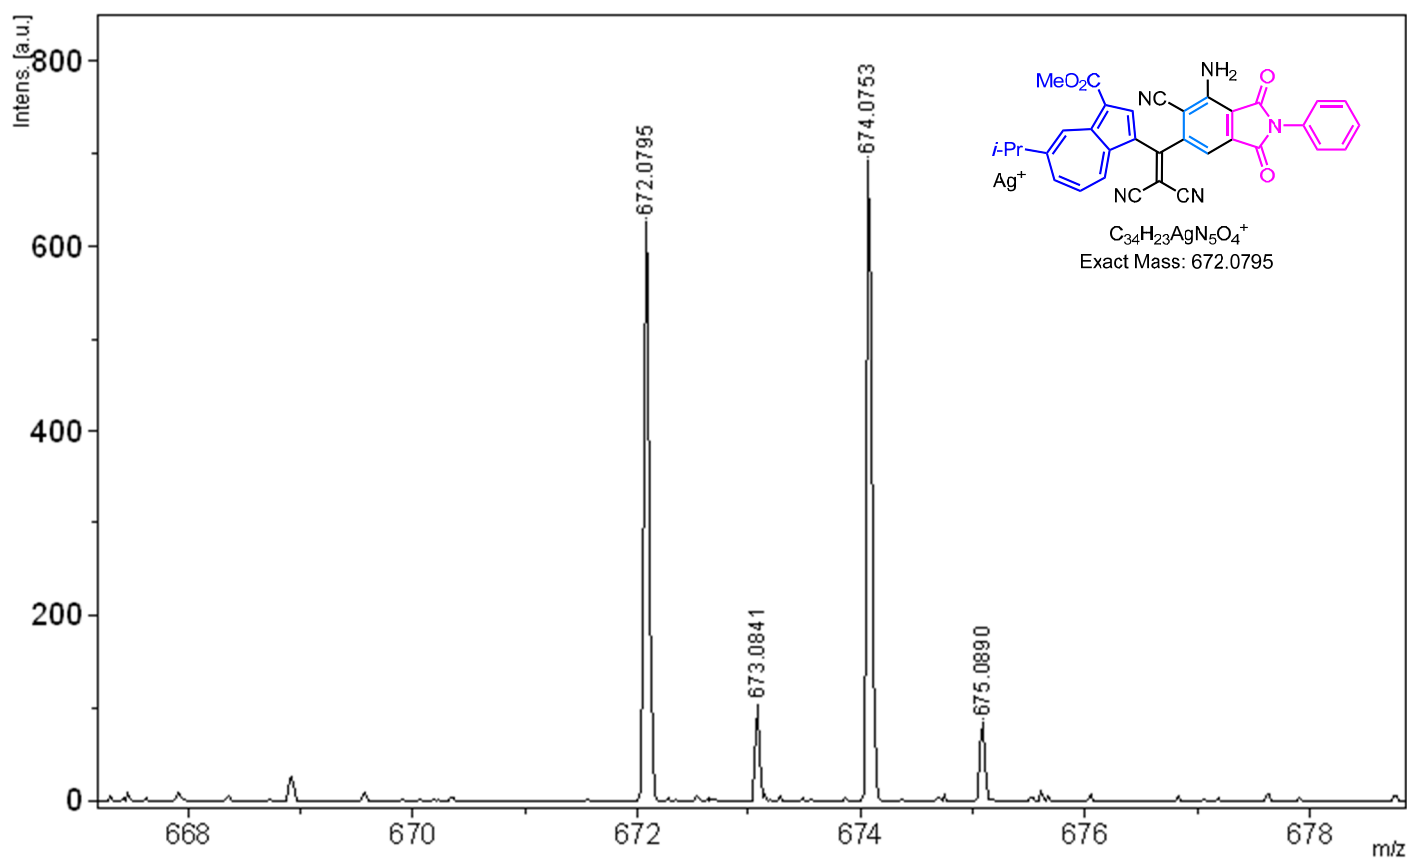

Figure S16. HRMS (MALDI-TOF, positive) of **2d**.

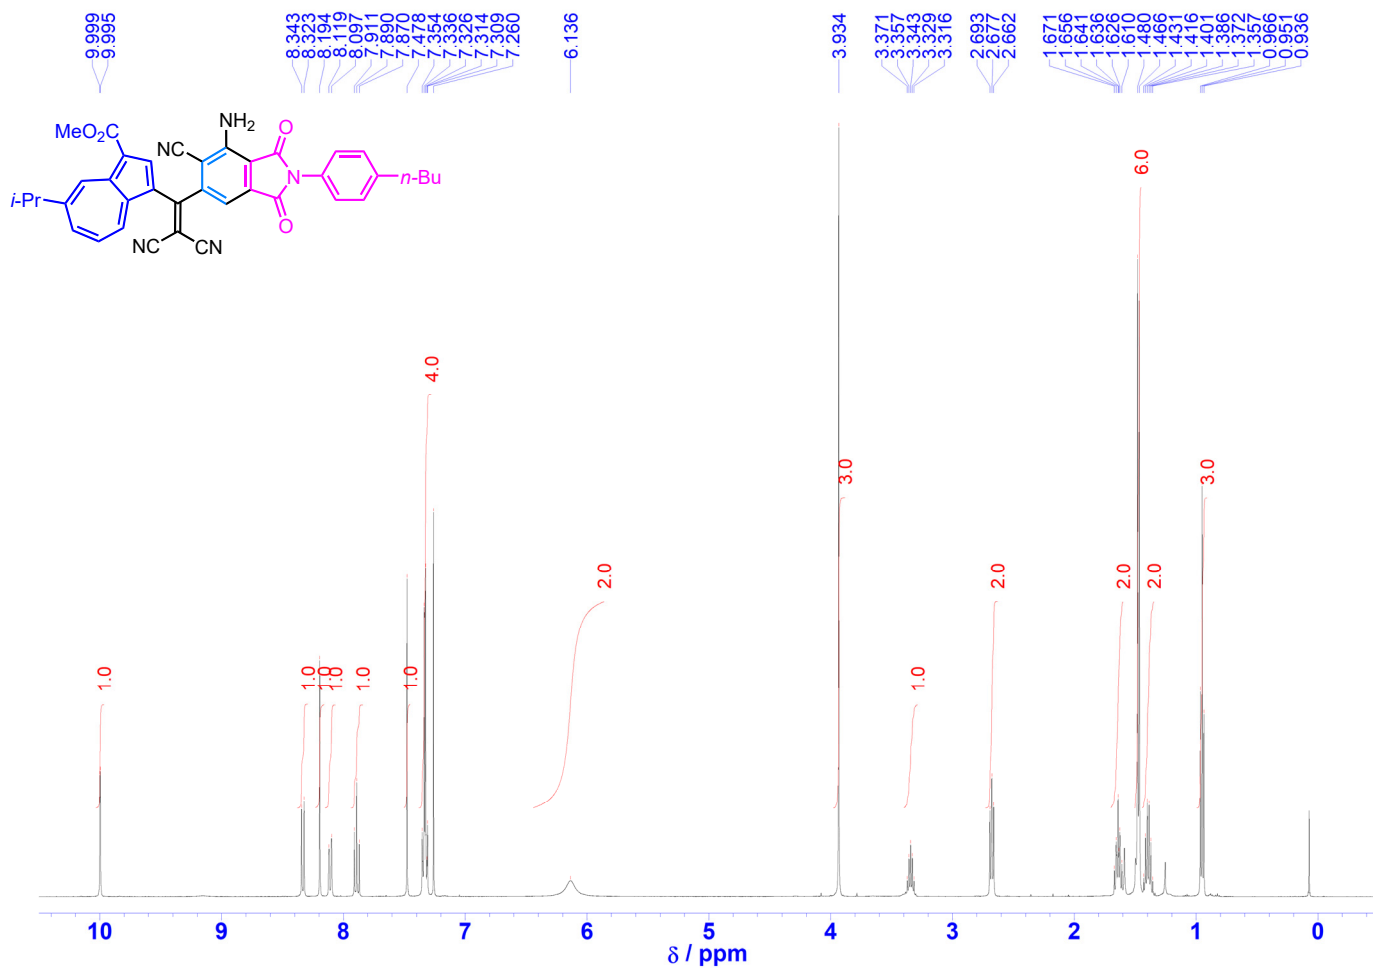

**Figure S17.**  $^1\text{H}$  NMR spectrum of **2e** in  $\text{CDCl}_3$  (500 MHz).

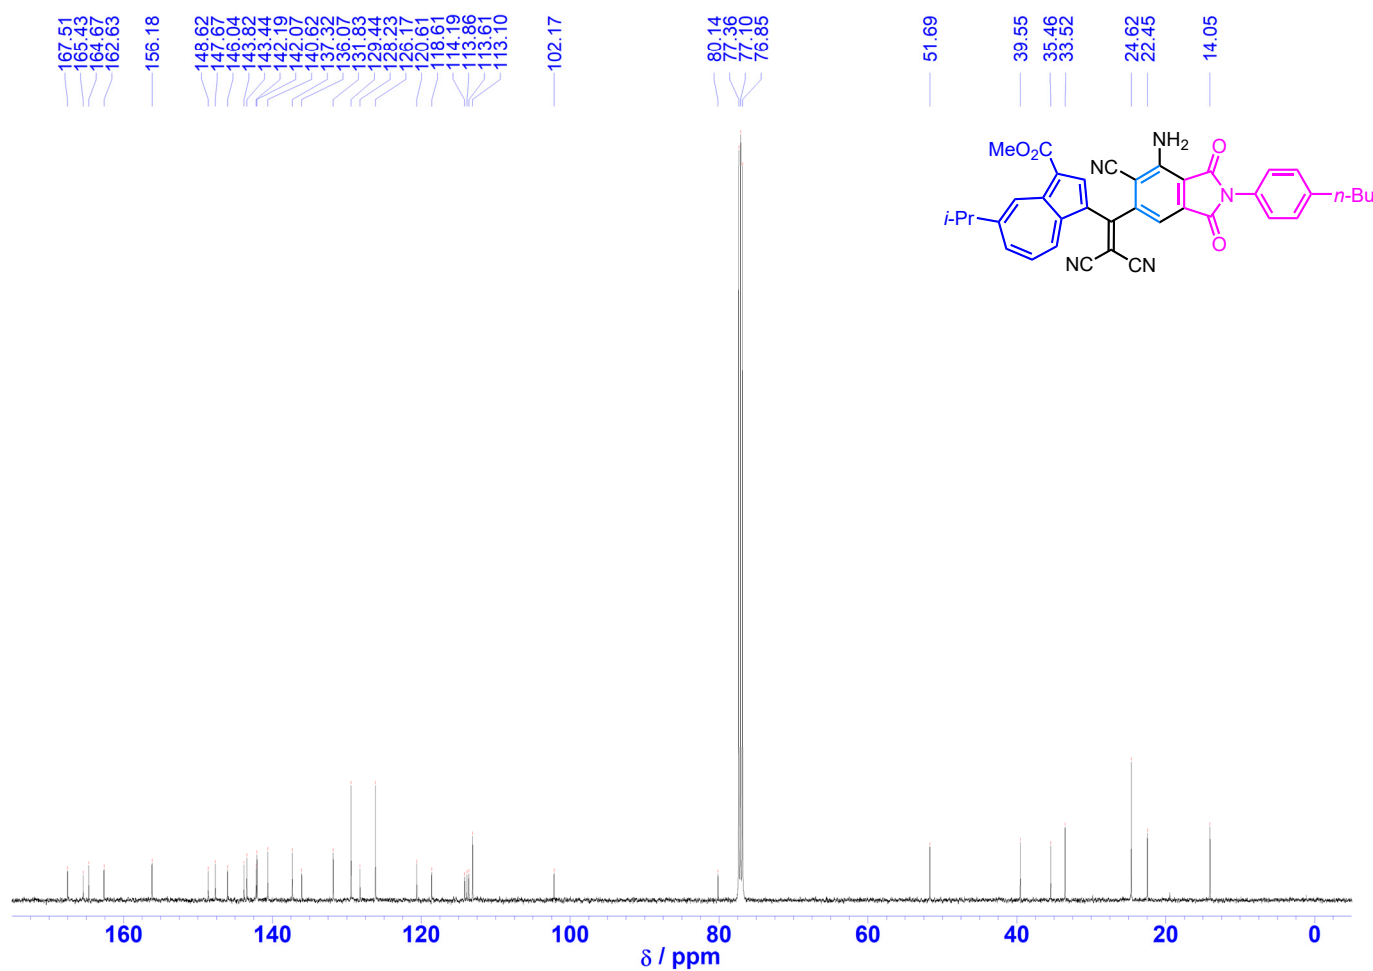

**Figure S18.**  $^{13}\text{C}$  NMR spectrum of **2e** in  $\text{CDCl}_3$  (125 MHz).

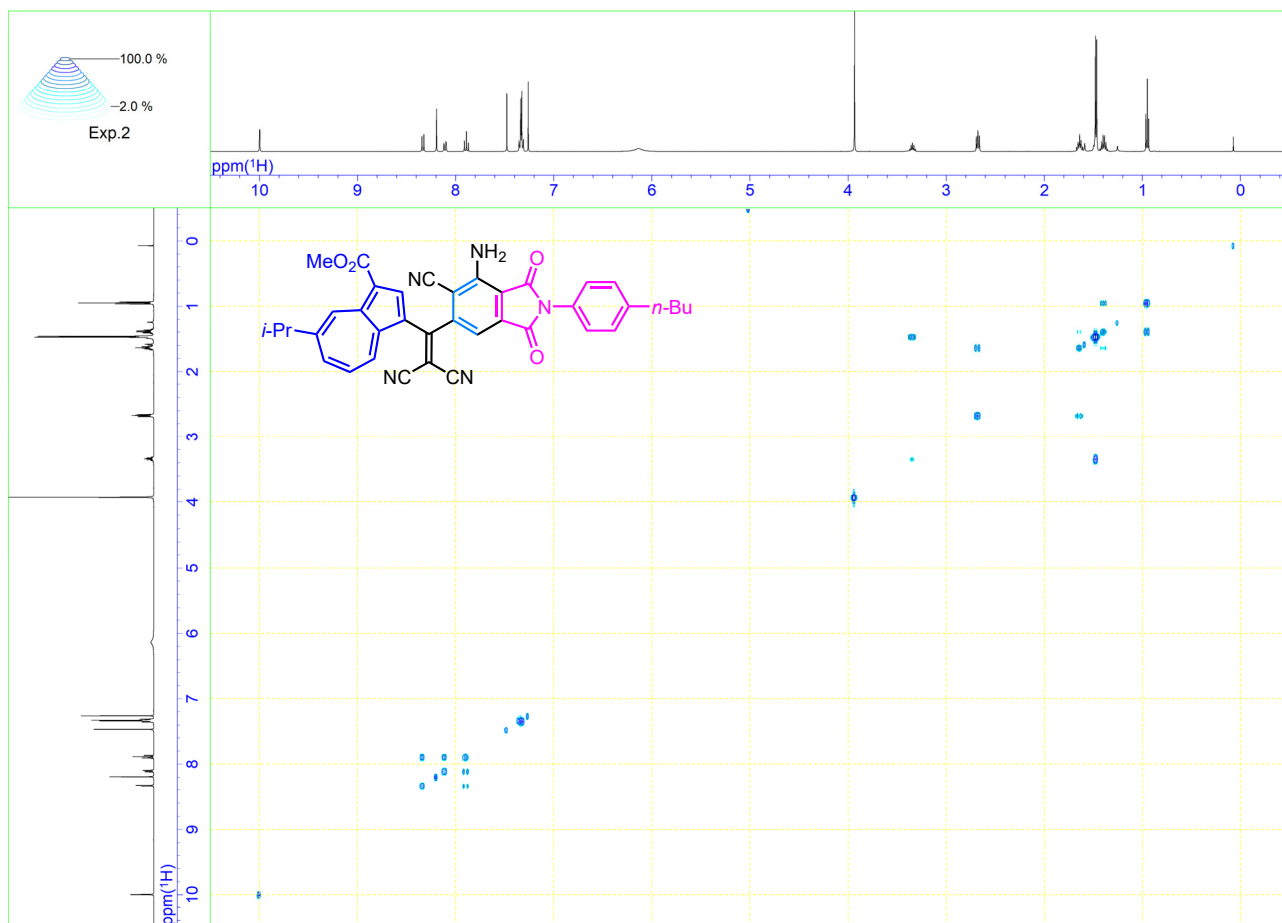

Figure S19. COSY spectrum of **2e** in CDCl<sub>3</sub> (500 MHz).

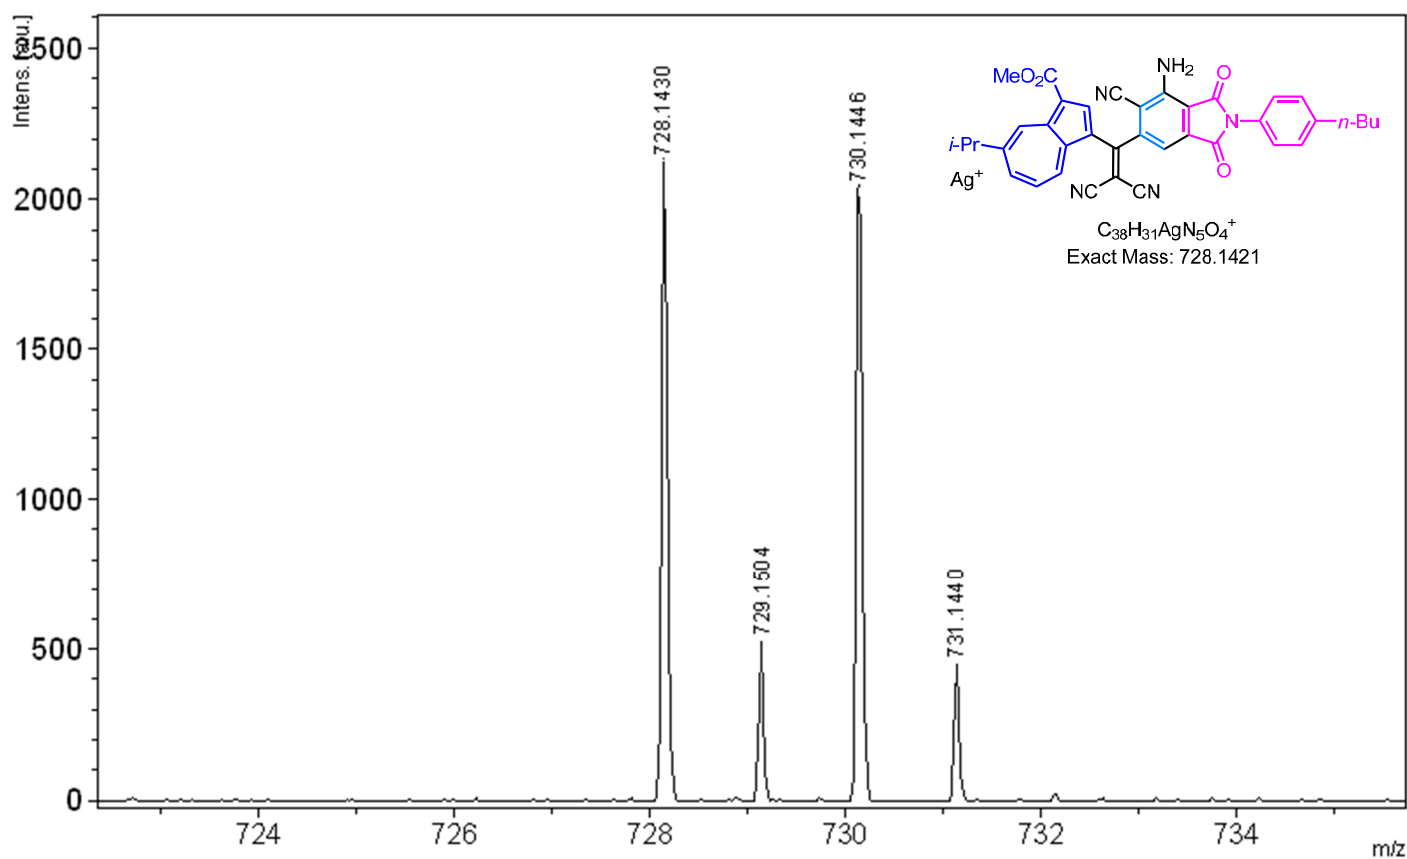

Figure S20. HRMS (MALDI-TOF, positive) of **2e**.



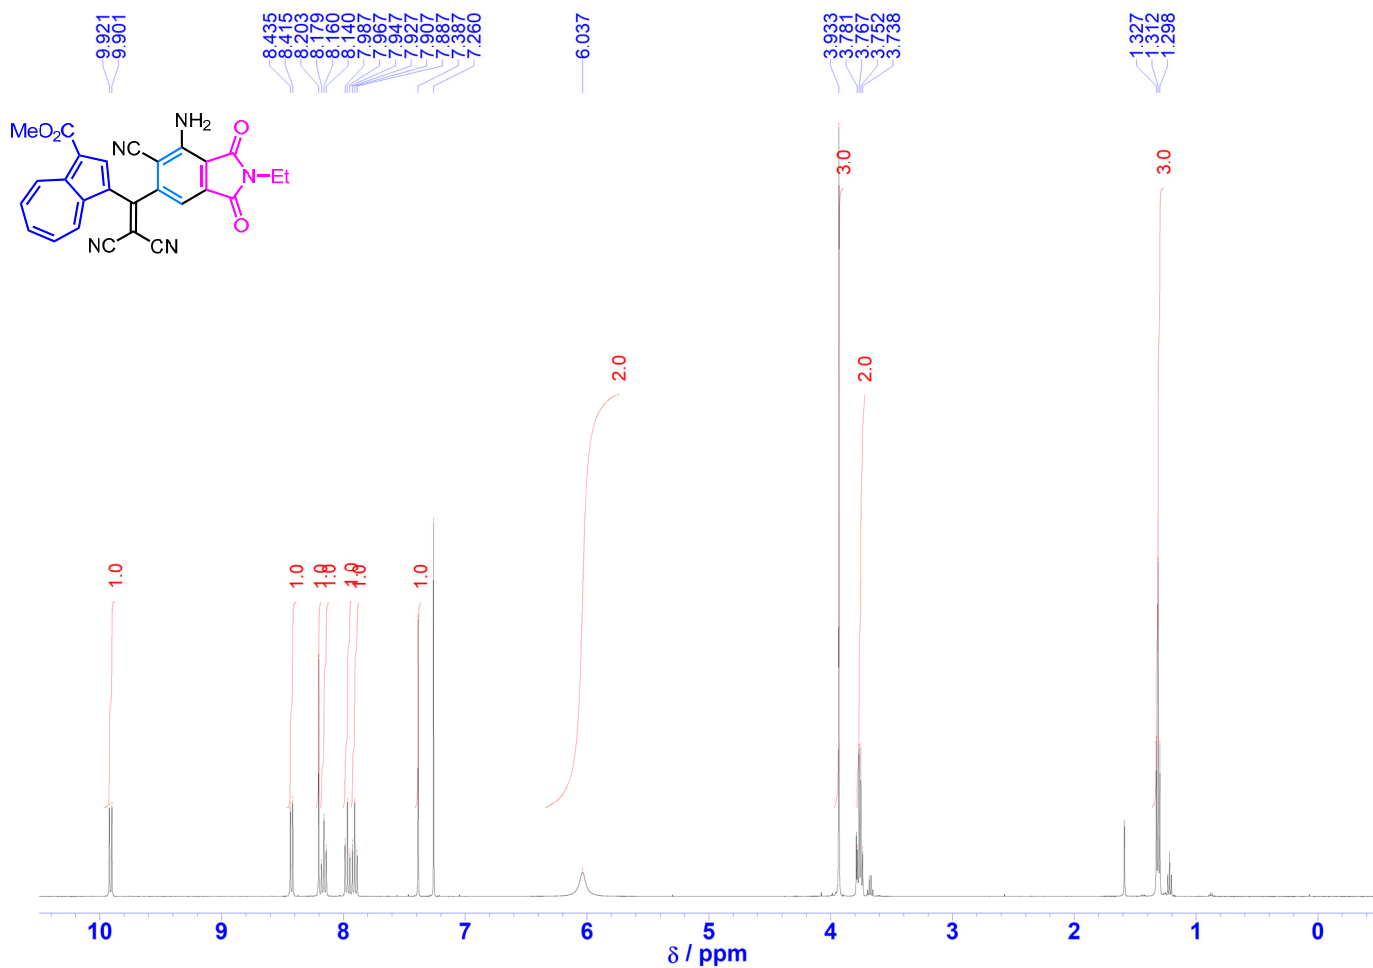

Figure S21. <sup>1</sup>H NMR spectrum of **4a** in CDCl<sub>3</sub> (500 MHz).

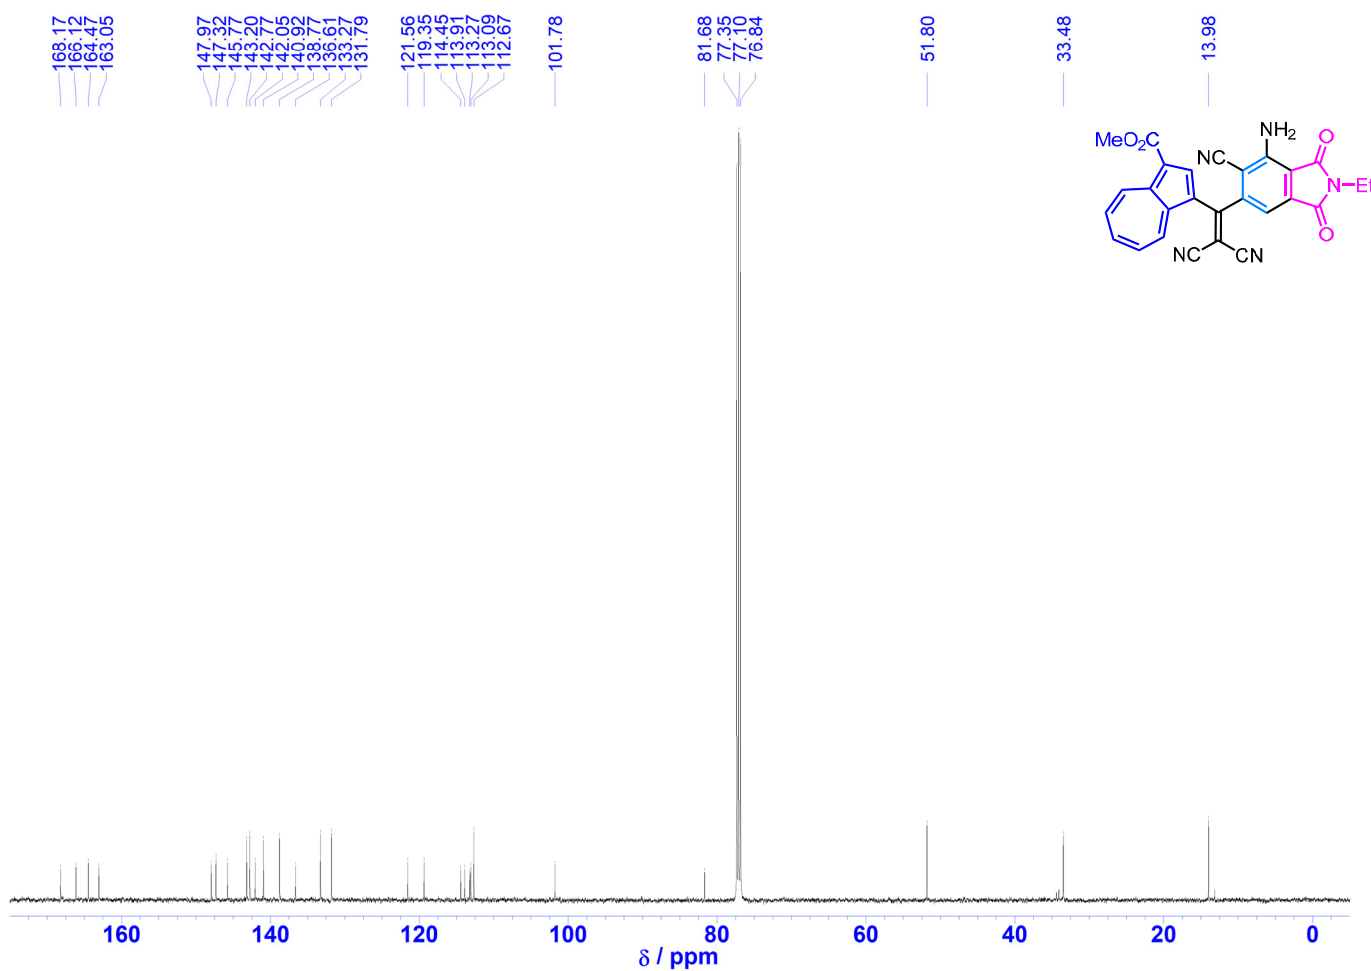

Figure S22. <sup>13</sup>C NMR spectrum of **4a** in CDCl<sub>3</sub> (125 MHz).

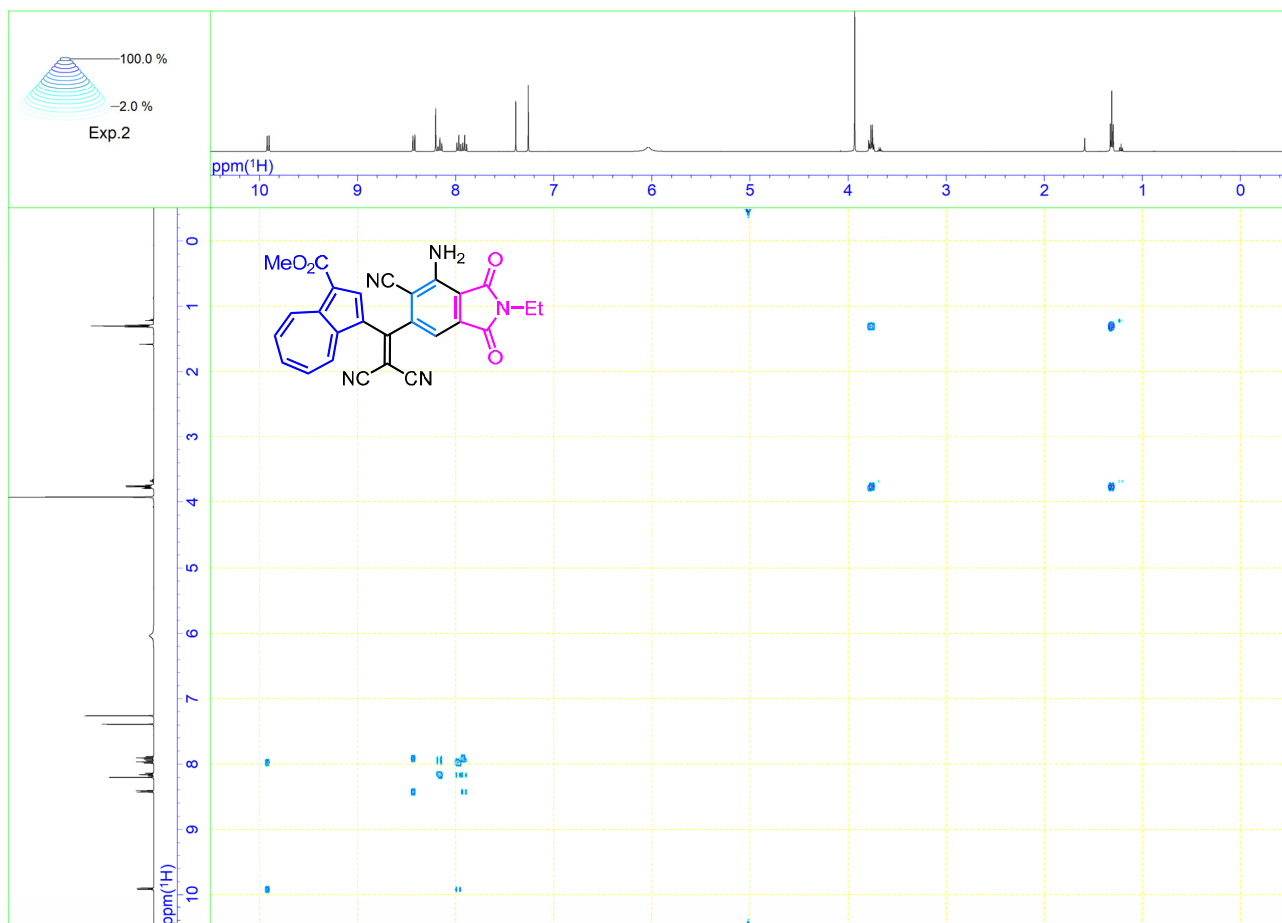

**Figure S23.** COSY spectrum of **4a** in  $\text{CDCl}_3$  (500 MHz).

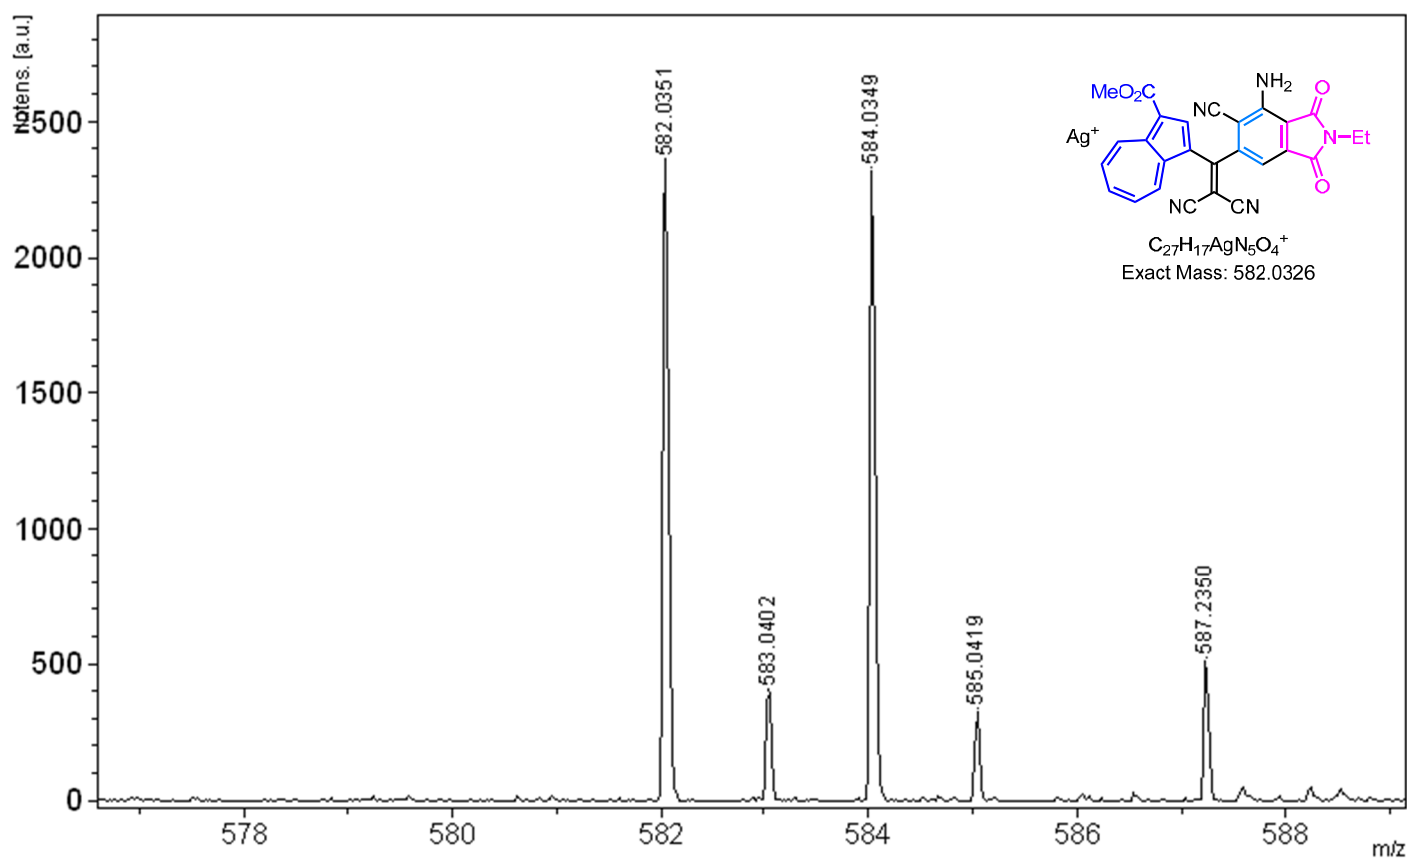

**Figure S24.** HRMS (MALDI-TOF, positive) of **4a**.

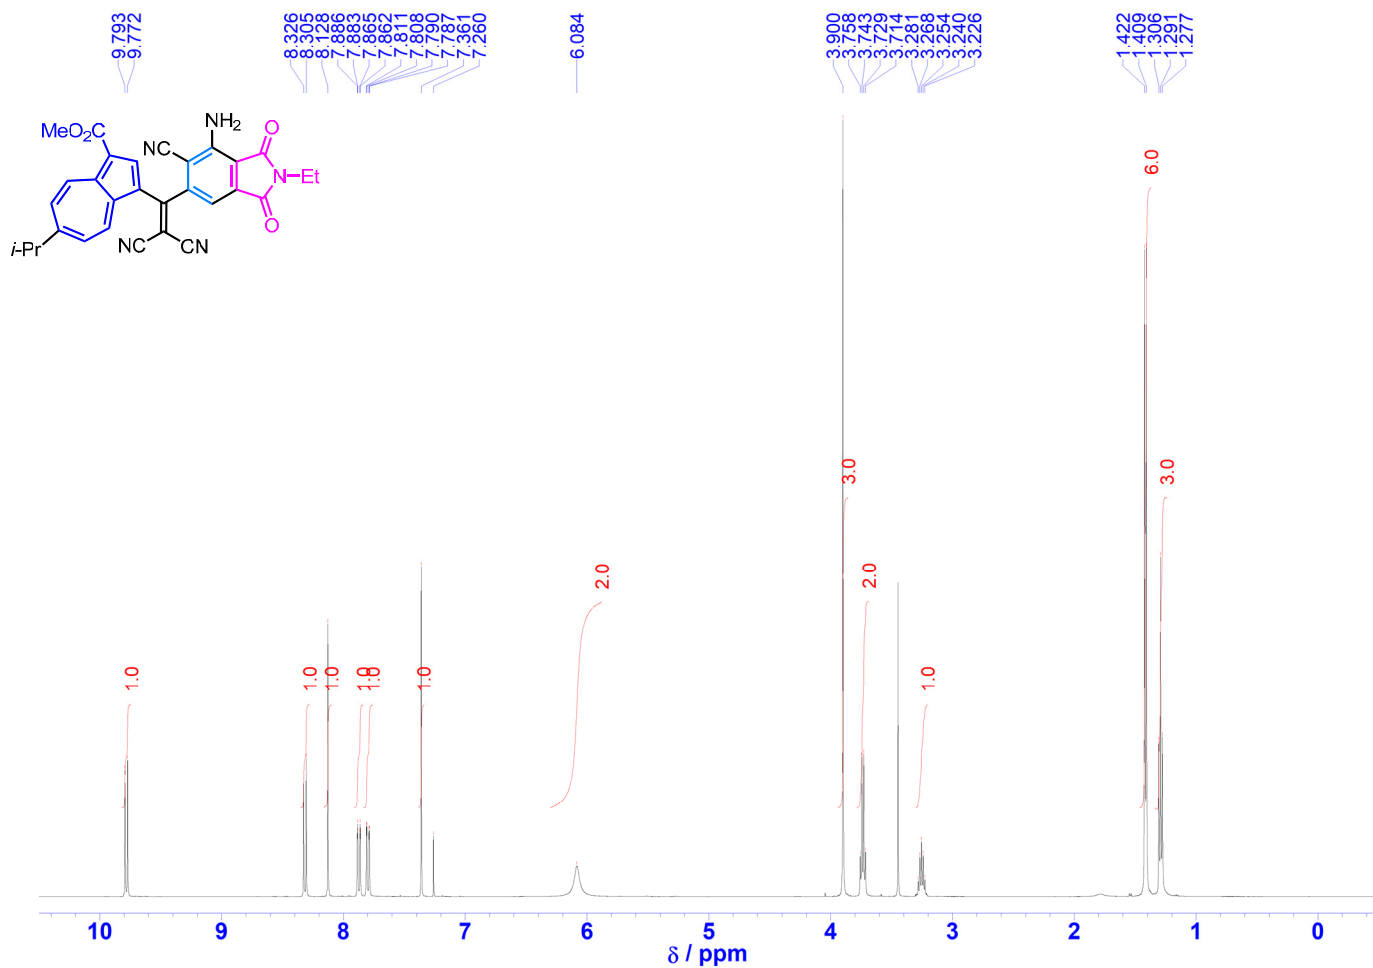

Figure S25.  $^1\text{H NMR}$  spectrum of **4b** in  $\text{CDCl}_3$  (500 MHz).

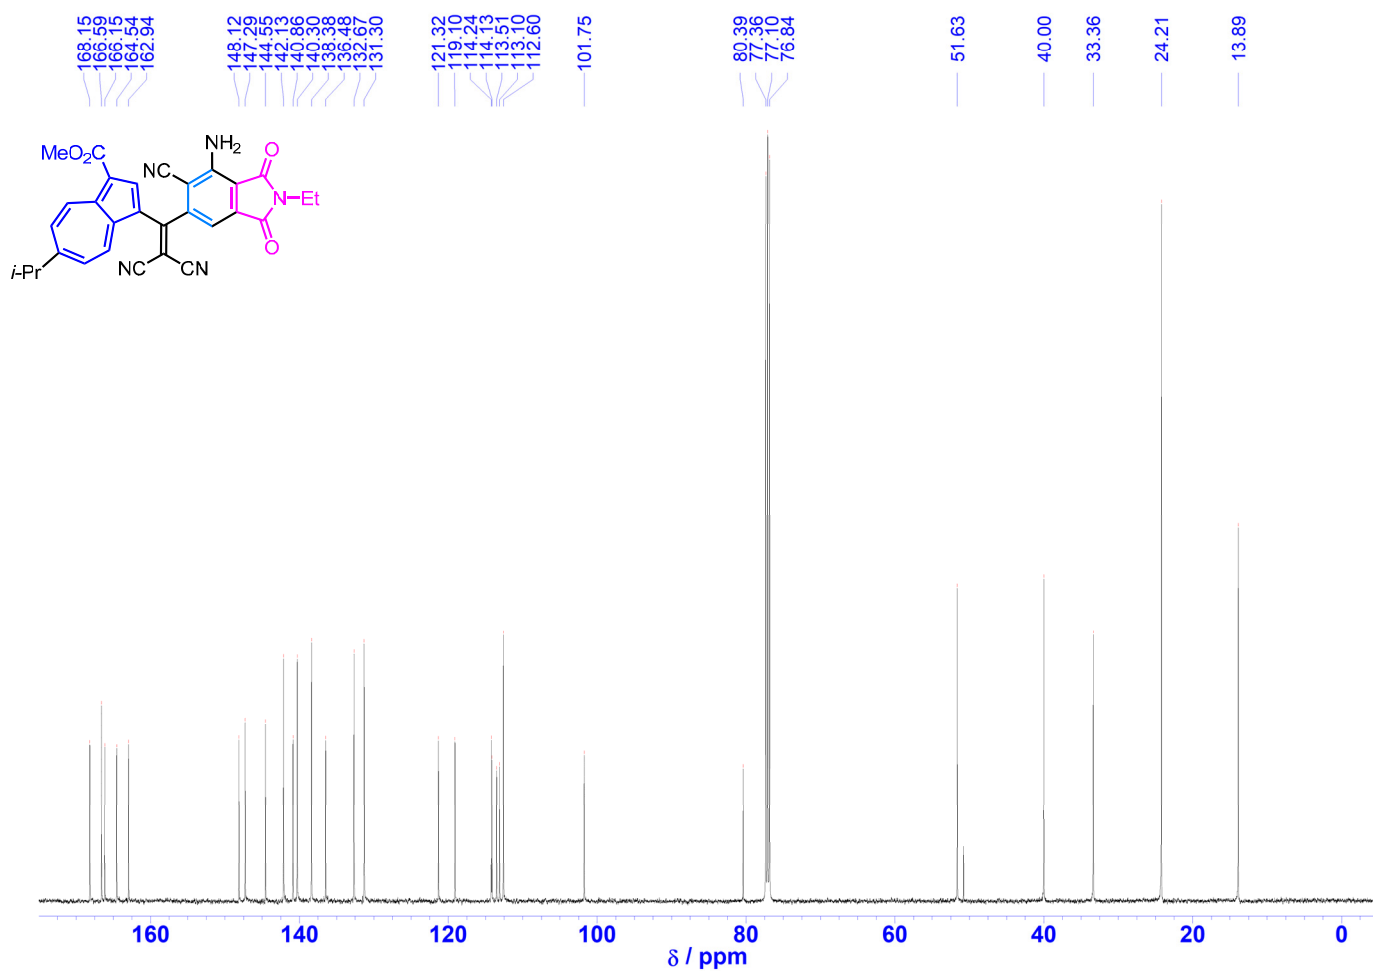

Figure S26.  $^{13}\text{C NMR}$  spectrum of **4b** in  $\text{CDCl}_3$  (125 MHz).

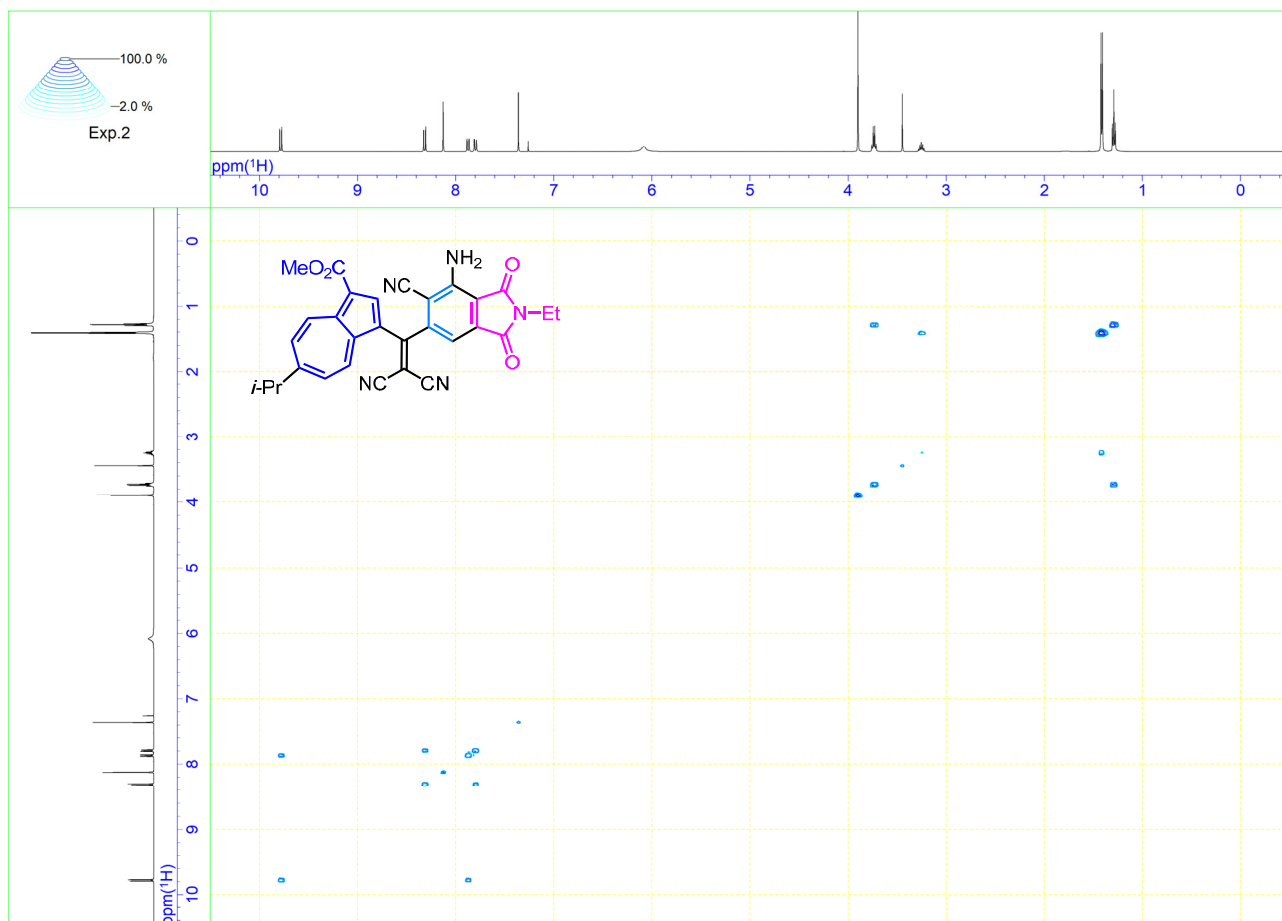

Figure S27. COSY spectrum of **4b** in CDCl<sub>3</sub> (500 MHz).

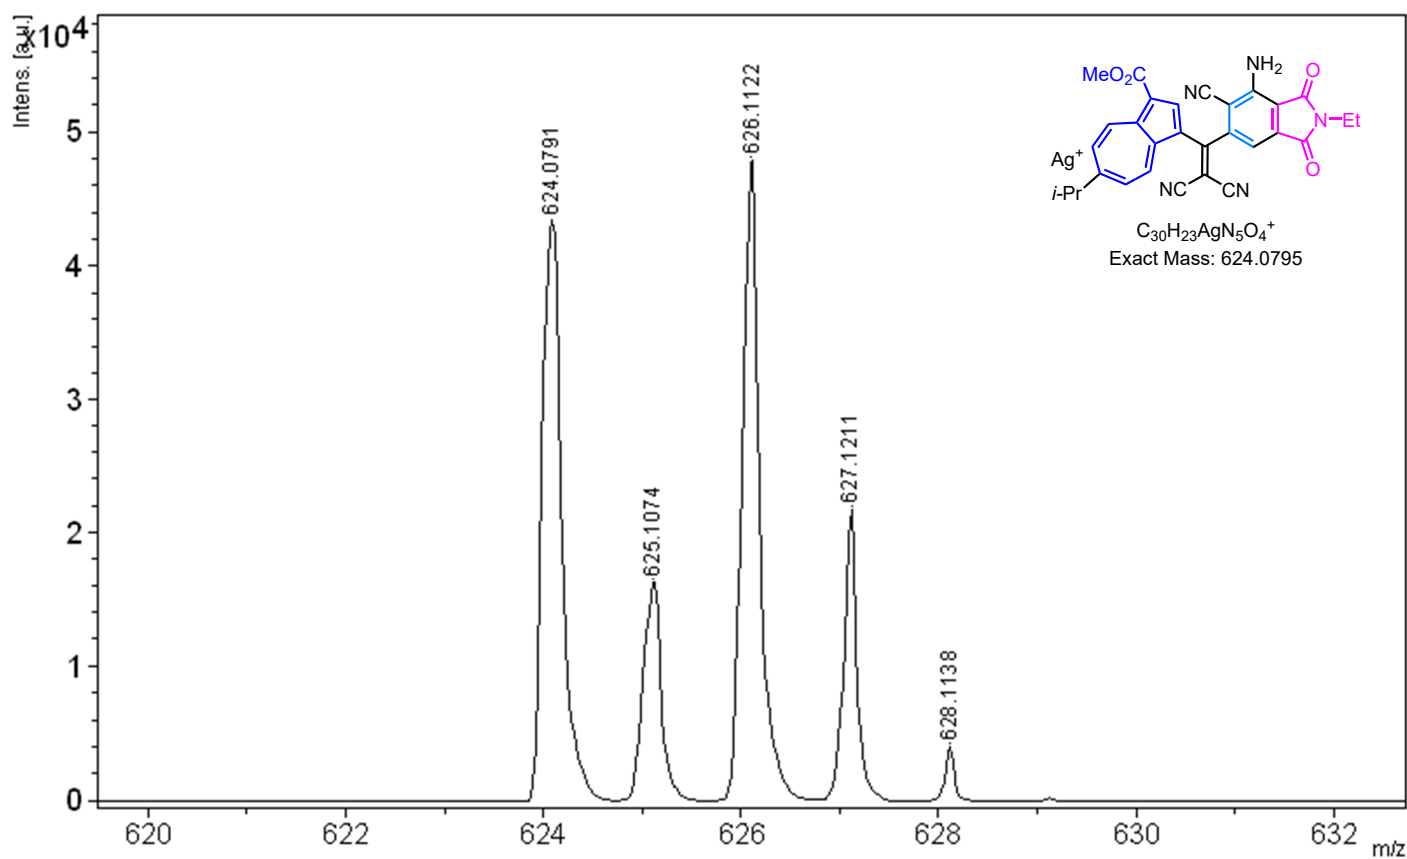

Figure S28. HRMS (MALDI-TOF, positive) of **4b**.

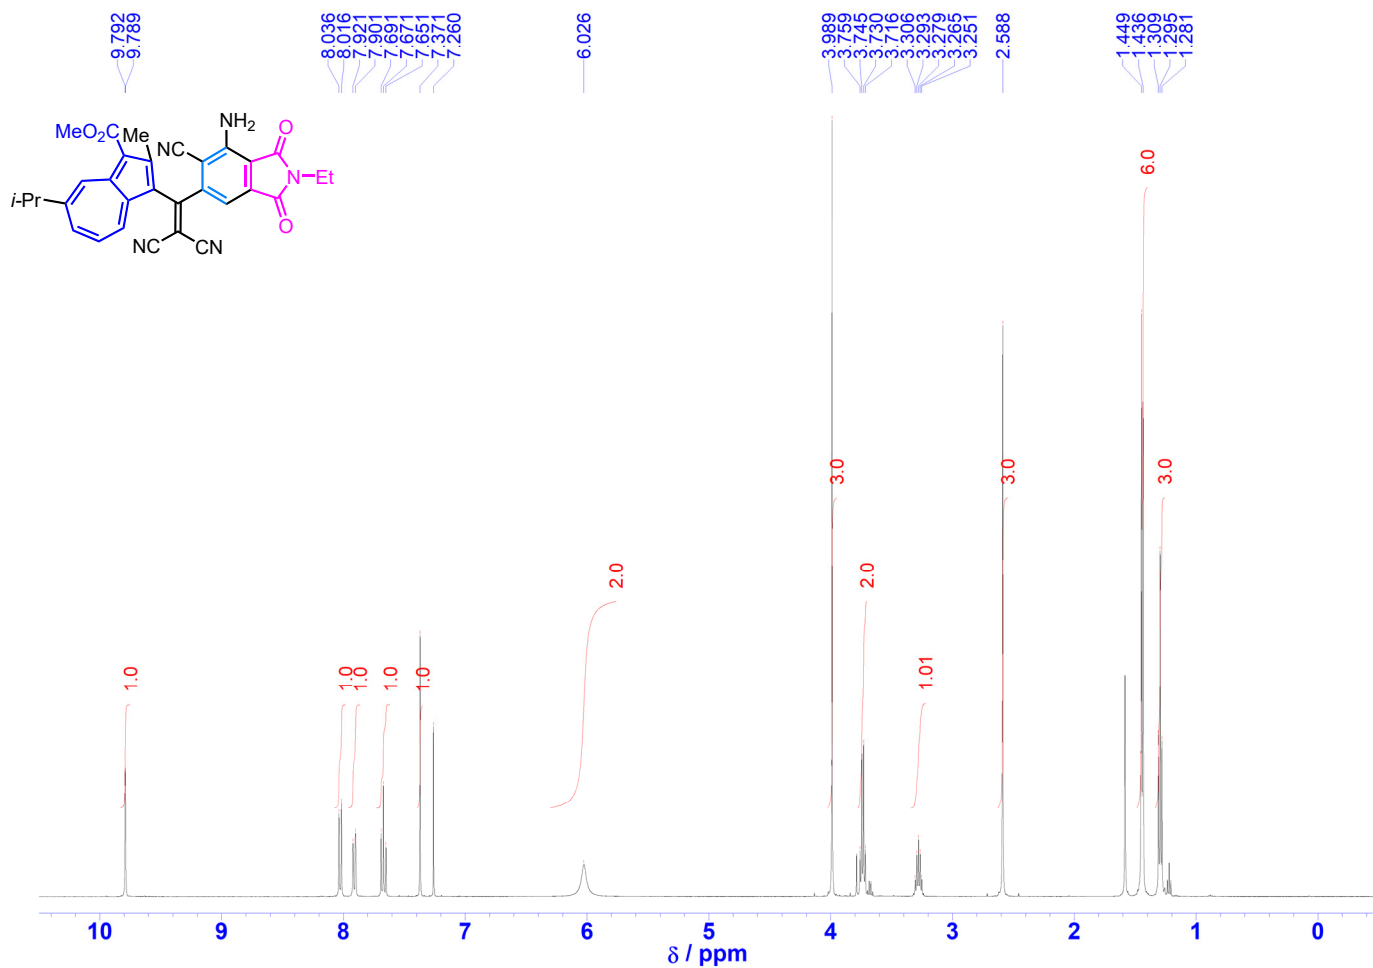

Figure S29.  $^1\text{H NMR}$  spectrum of **4c** in  $\text{CDCl}_3$  (500 MHz).

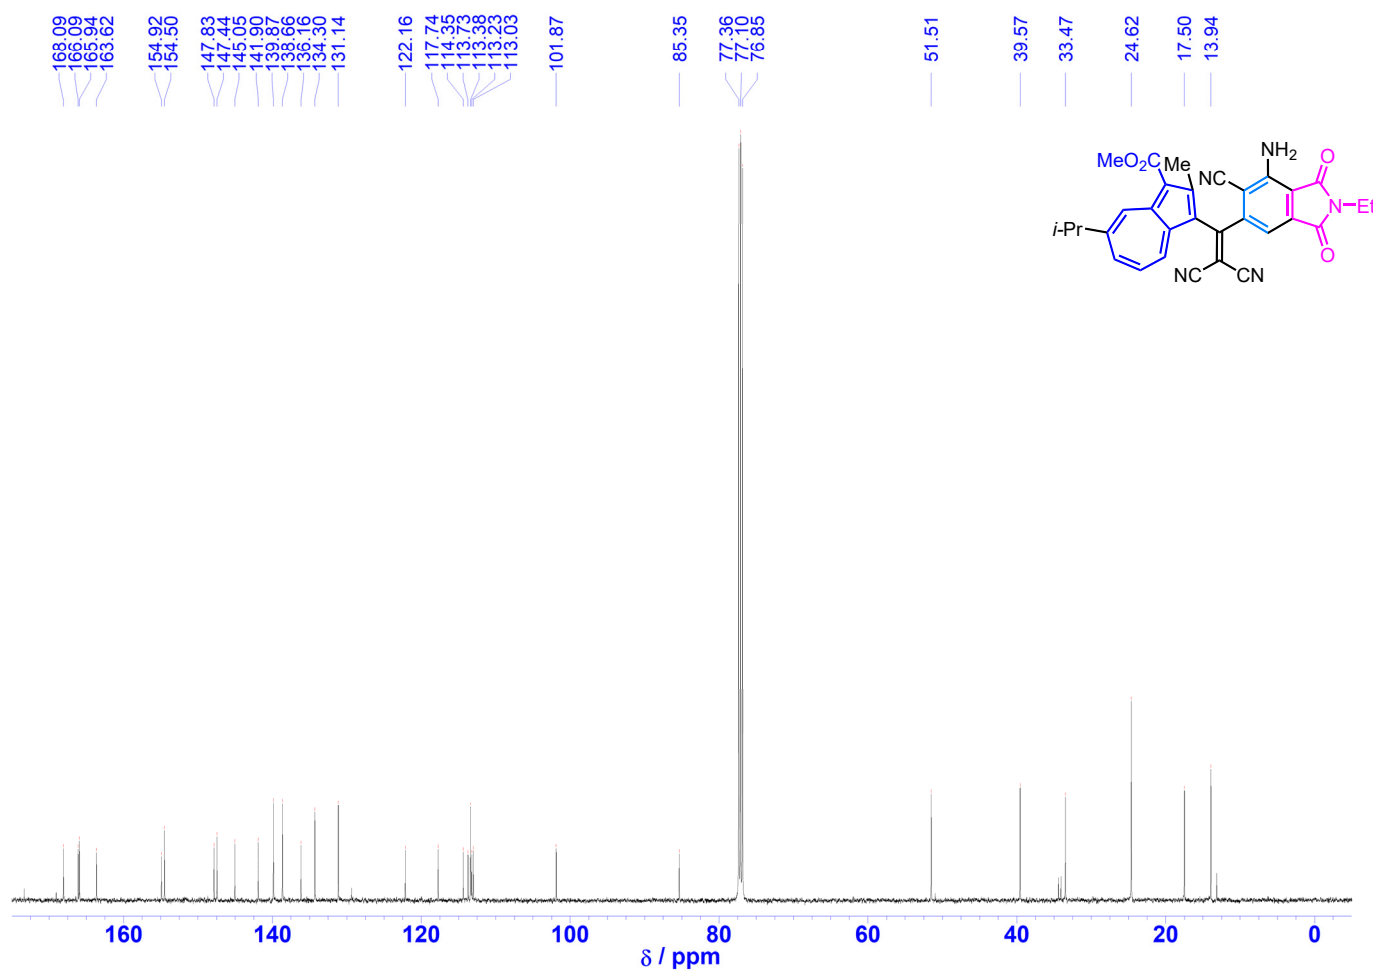

Figure S30.  $^{13}\text{C NMR}$  spectrum of **4c** in  $\text{CDCl}_3$  (125 MHz).

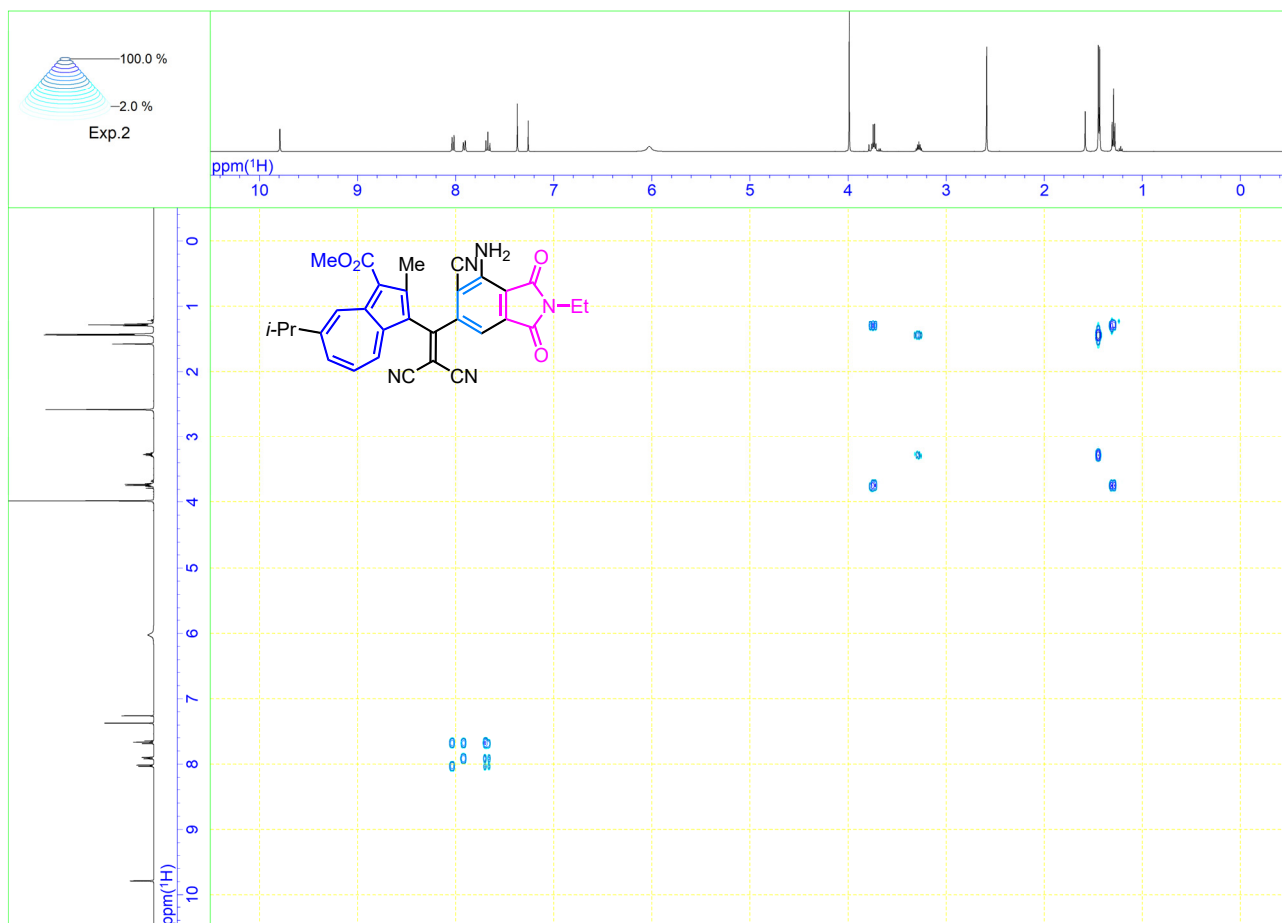

Figure S31. COSY spectrum of **4c** in CDCl<sub>3</sub> (500 MHz).

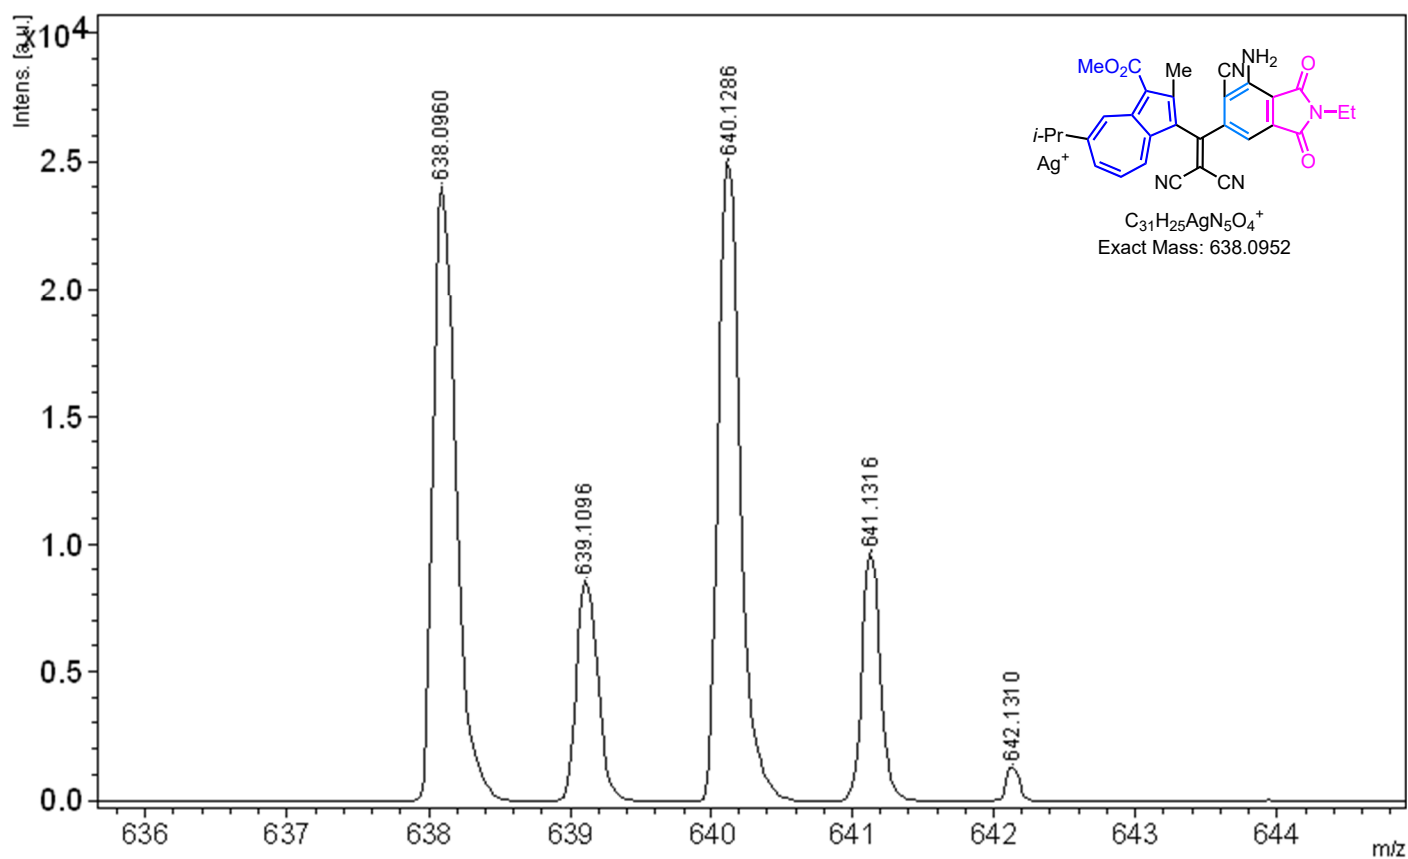

Figure S32. HRMS (MALDI-TOF, positive) of **4c**.

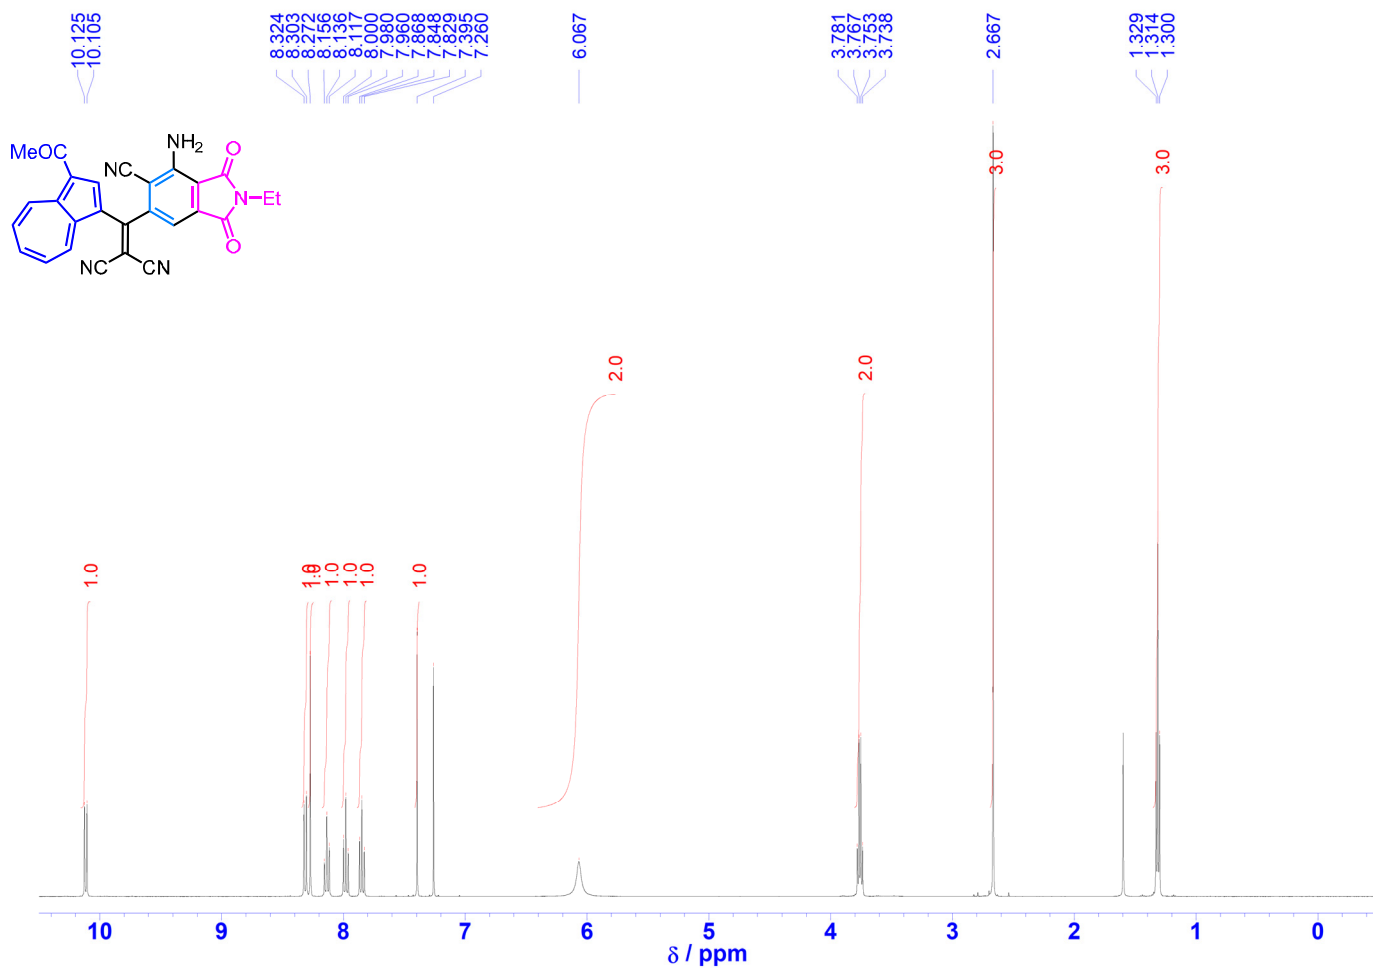

Figure S33. <sup>1</sup>H NMR spectrum of **4d** in CDCl<sub>3</sub> (500 MHz).

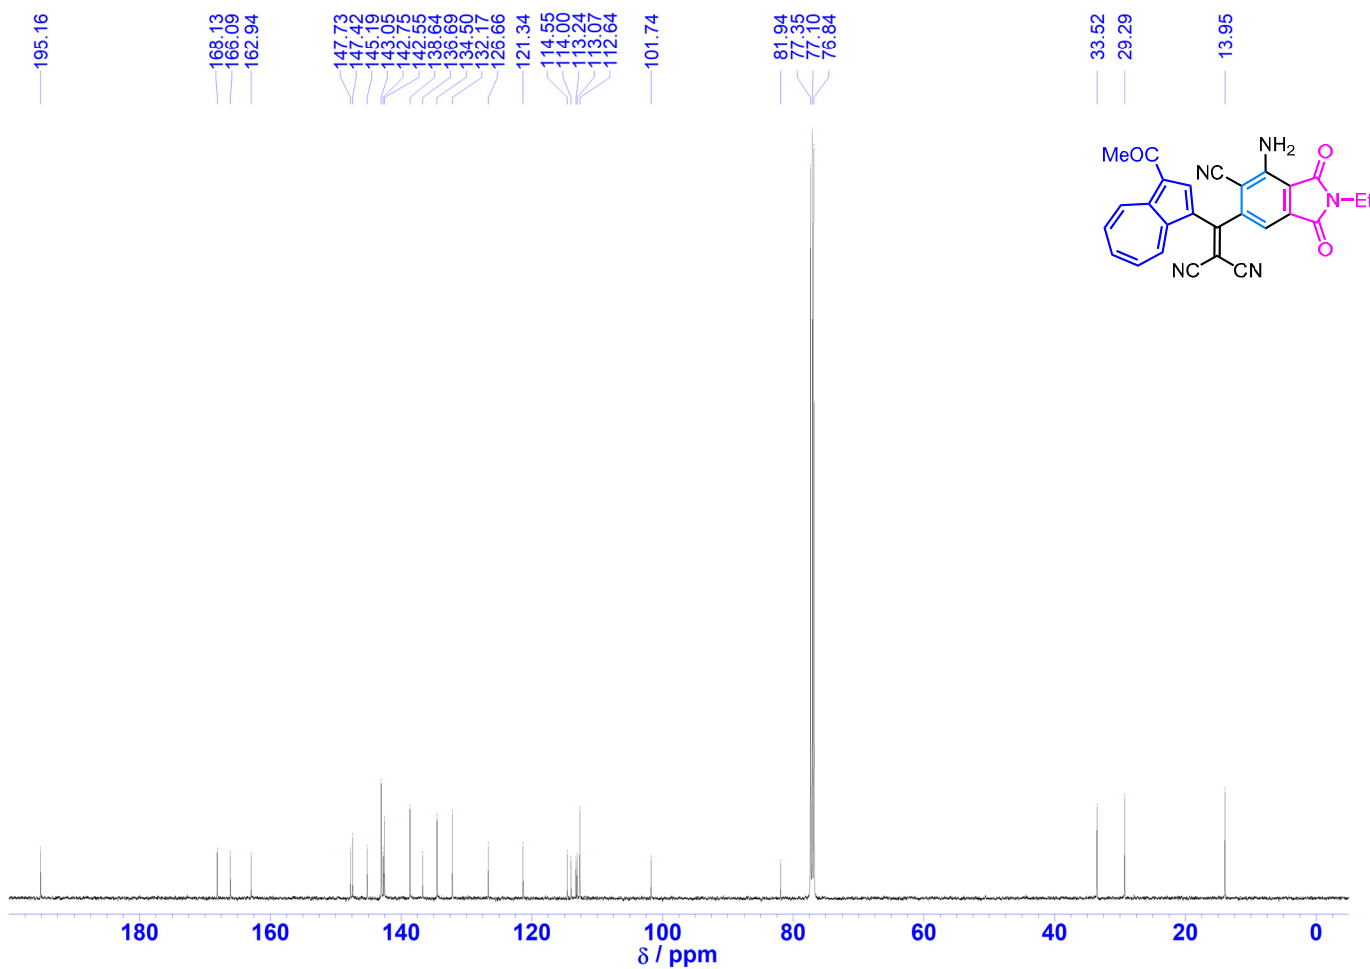

Figure S34. <sup>13</sup>C NMR spectrum of **4d** in CDCl<sub>3</sub> (125 MHz).

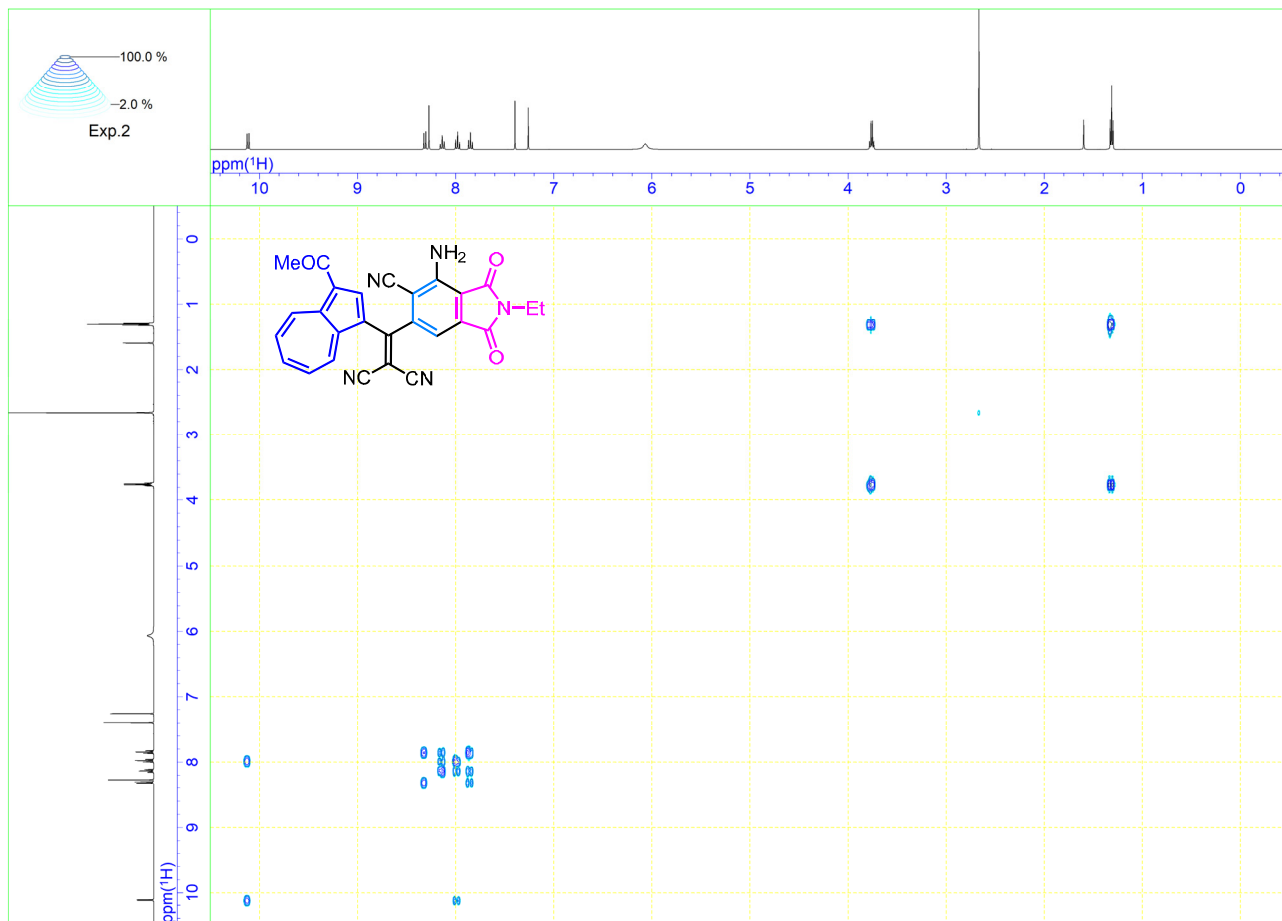

**Figure S35.** COSY spectrum of **4d** in  $\text{CDCl}_3$  (500 MHz).

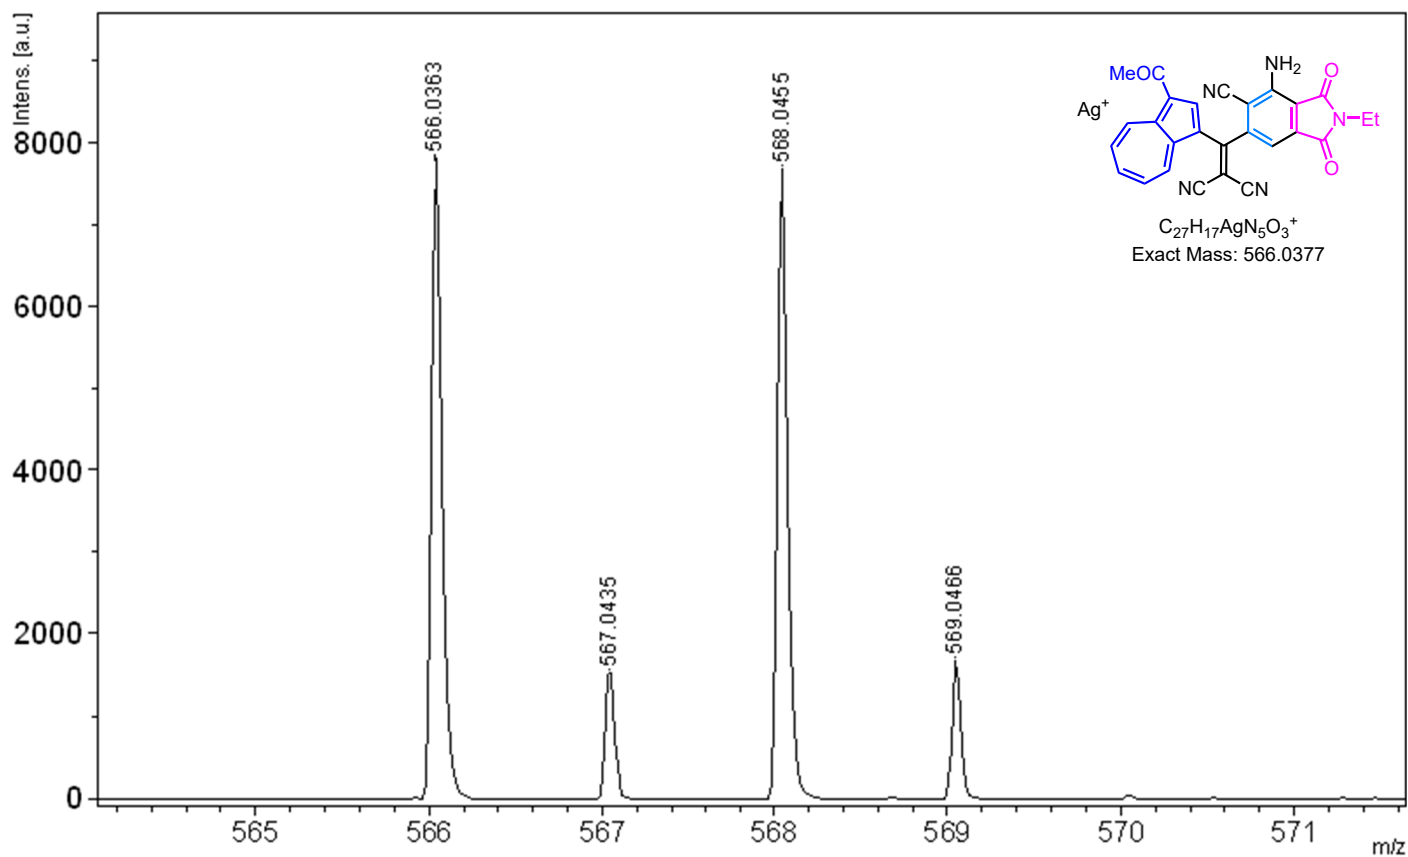

**Figure S36.** HRMS (MALDI-TOF, positive) of **4d**.



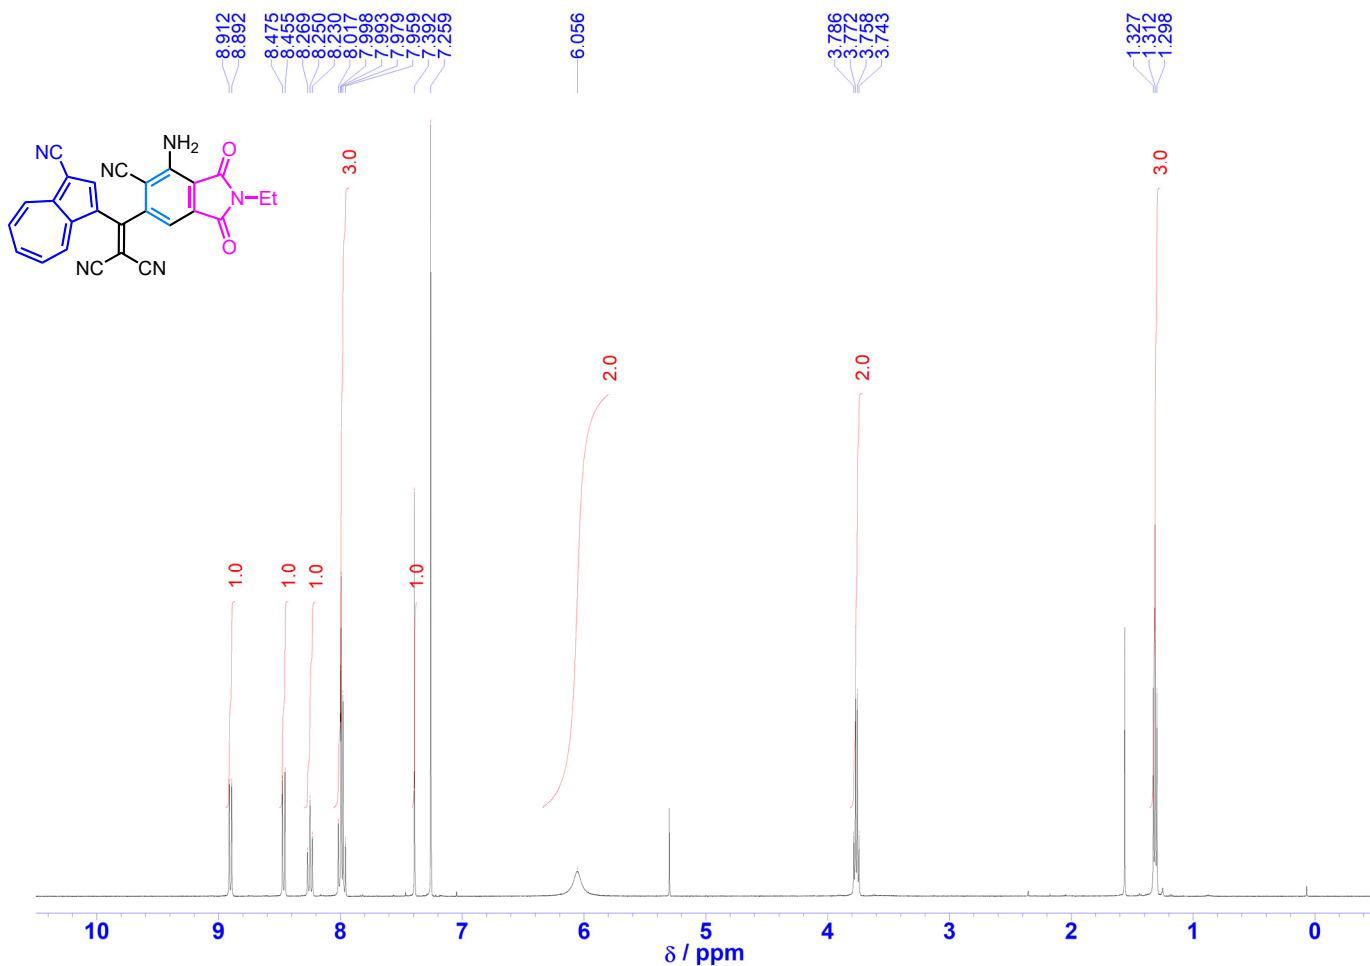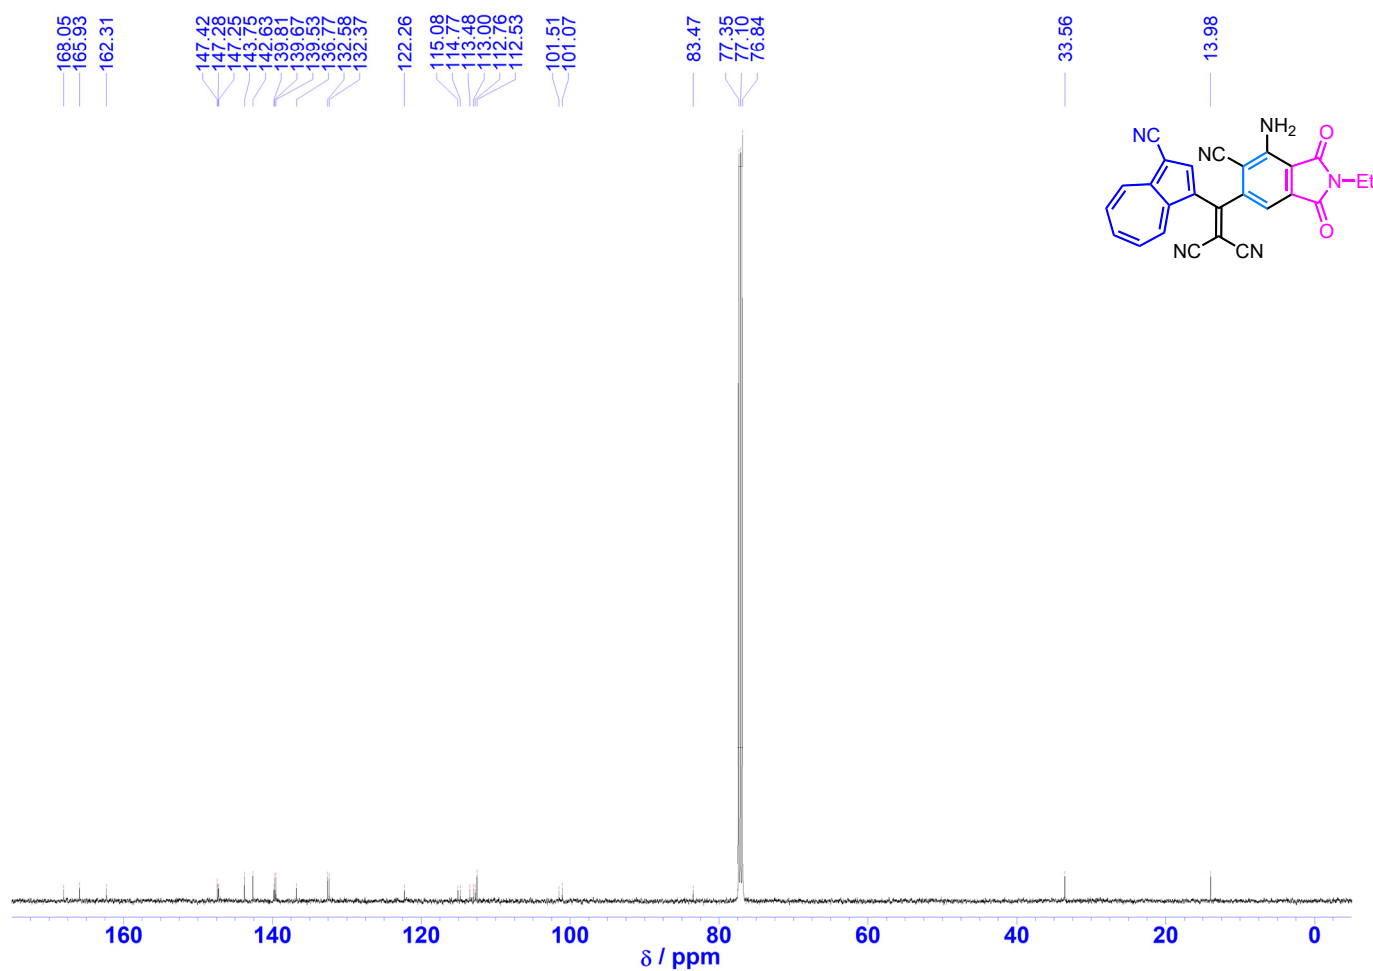

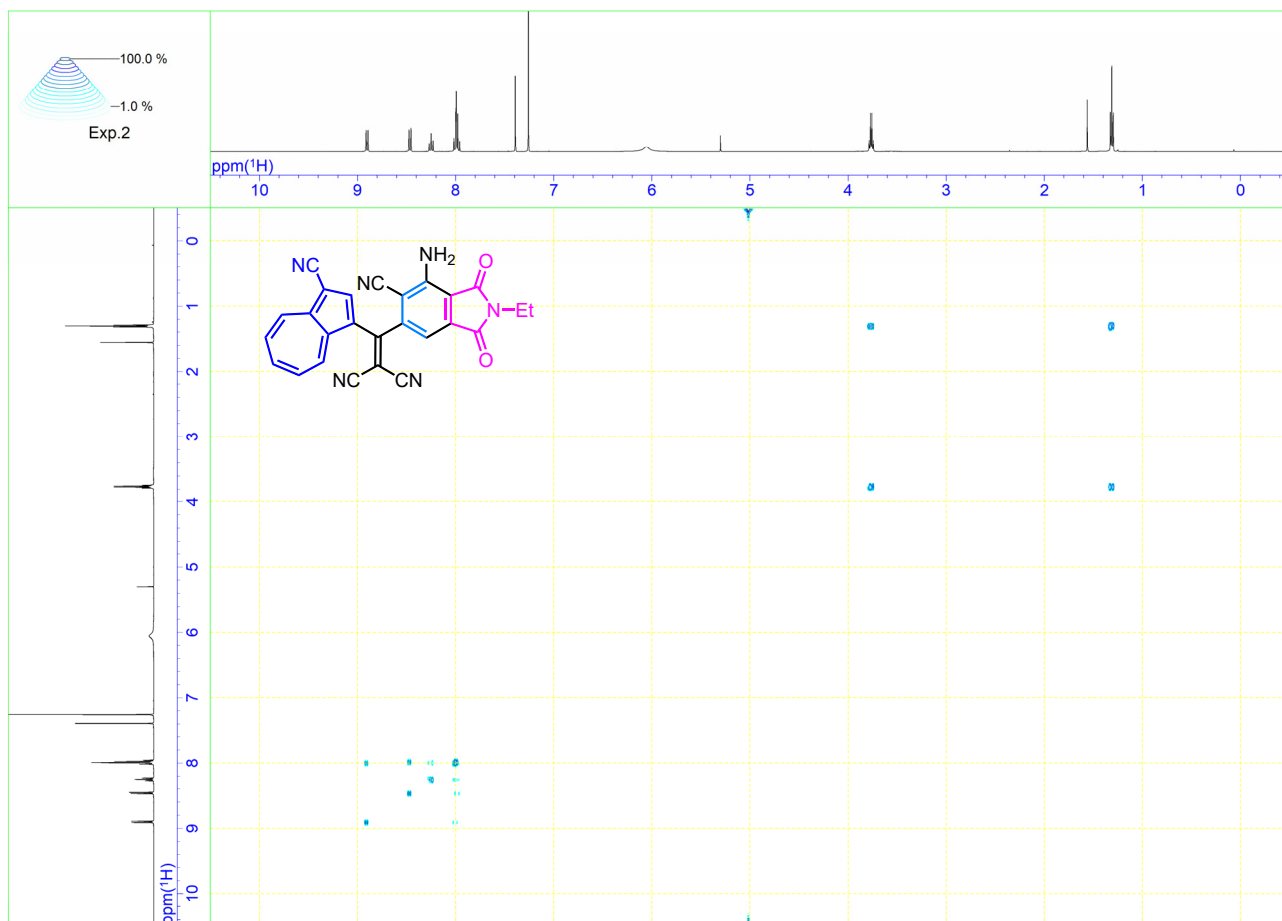

Figure S39. COSY spectrum of **4e** in CDCl<sub>3</sub> (500 MHz).

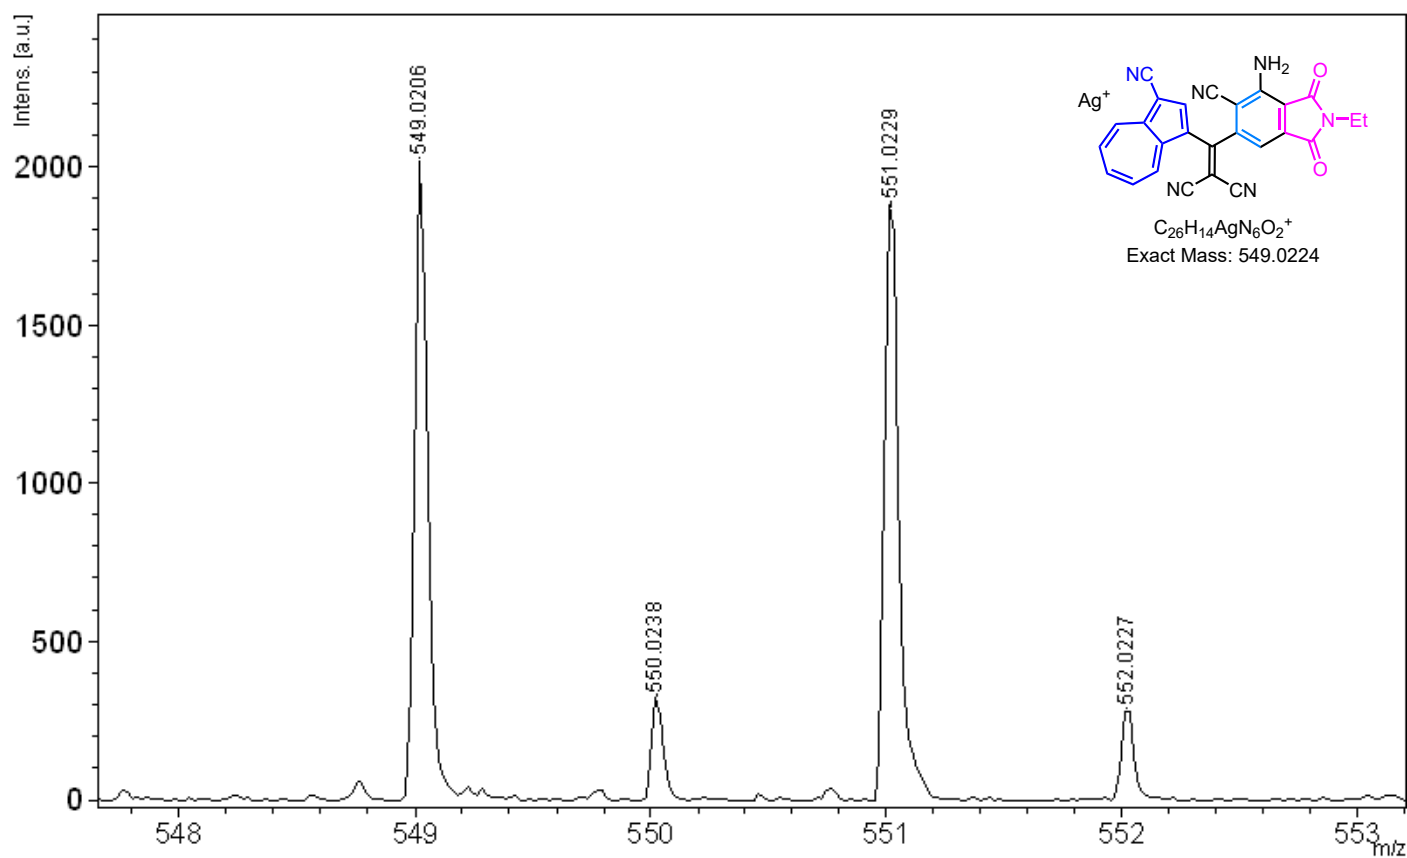

Figure S40. HRMS (MALDI-TOF, positive) of **4e**.

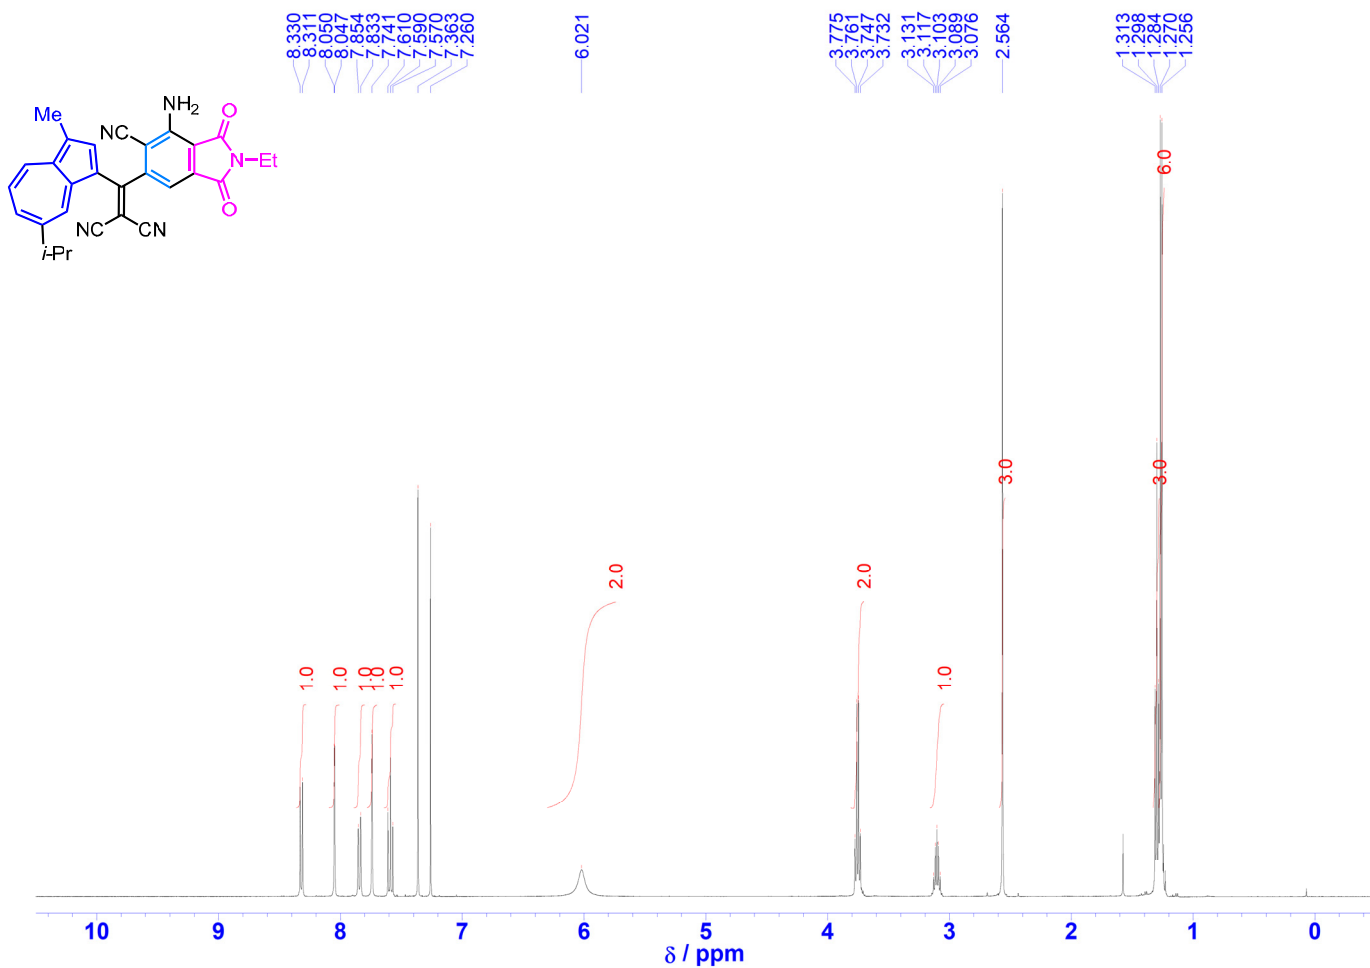

Figure S41. <sup>1</sup>H NMR spectrum of **4f** in CDCl<sub>3</sub> (500 MHz).

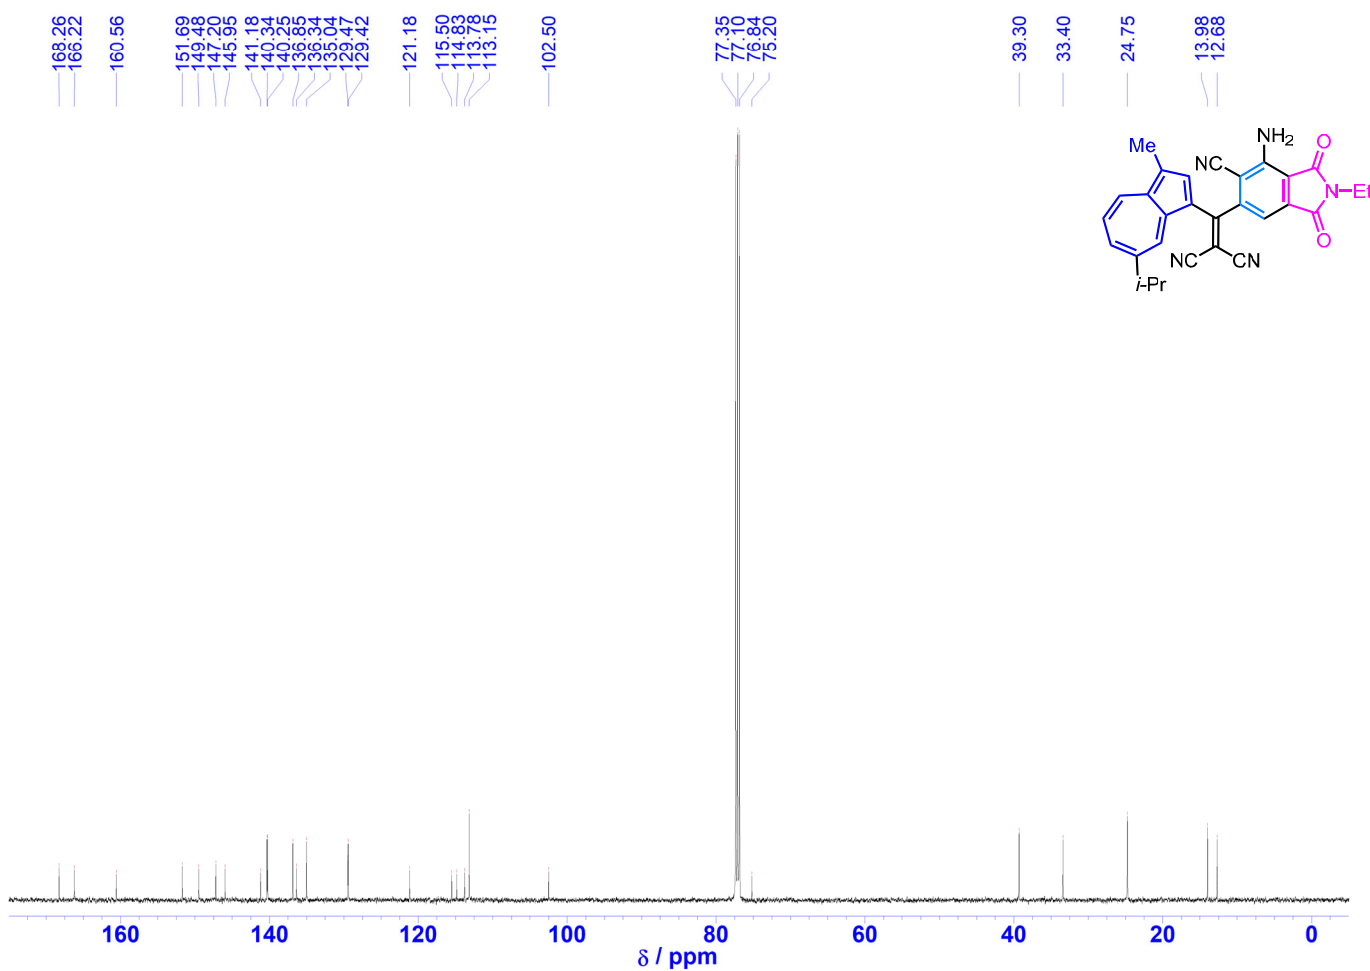

Figure S42. <sup>13</sup>C NMR spectrum of **4f** in CDCl<sub>3</sub> (125 MHz).

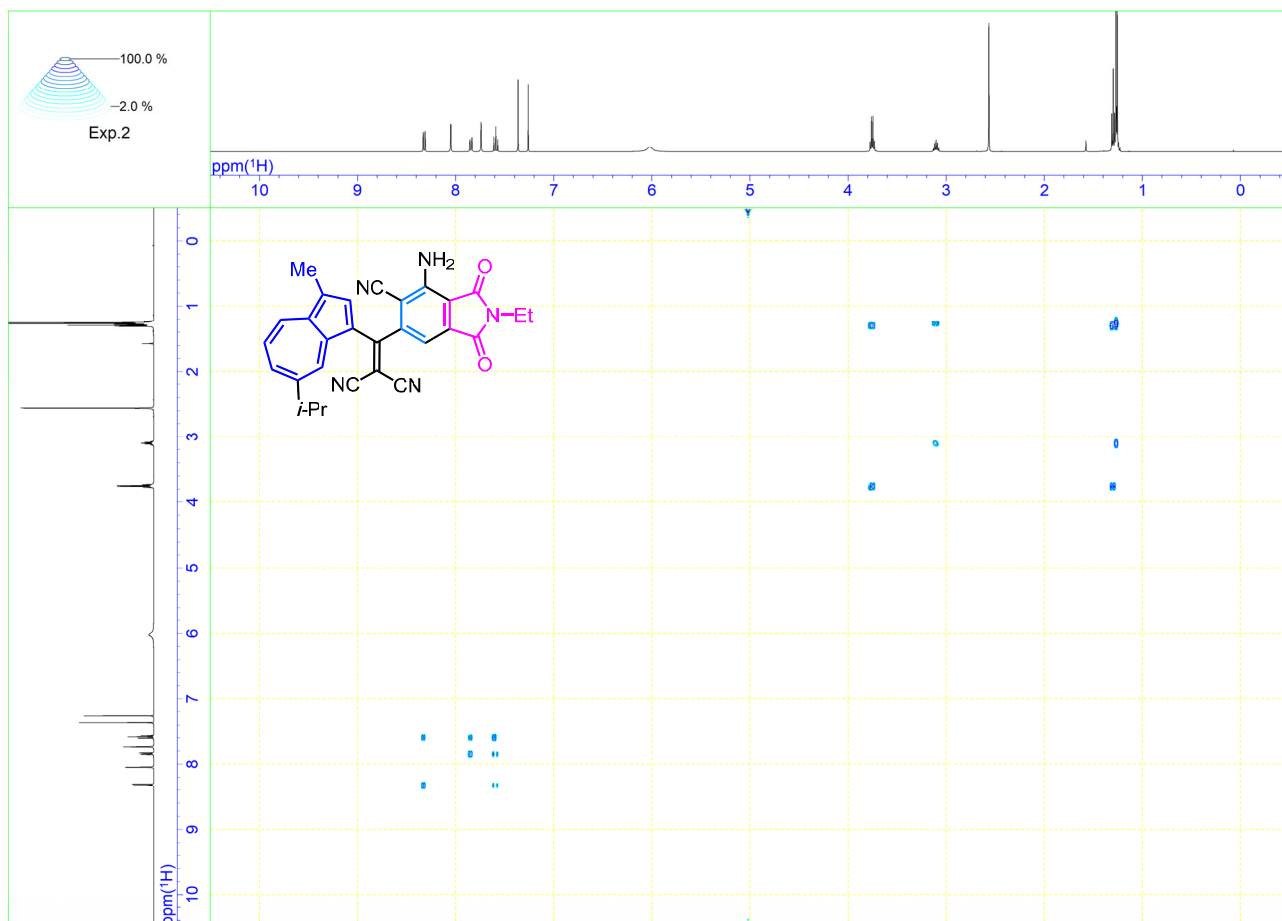

Figure S43. COSY spectrum of **4f** in CDCl<sub>3</sub> (500 MHz).

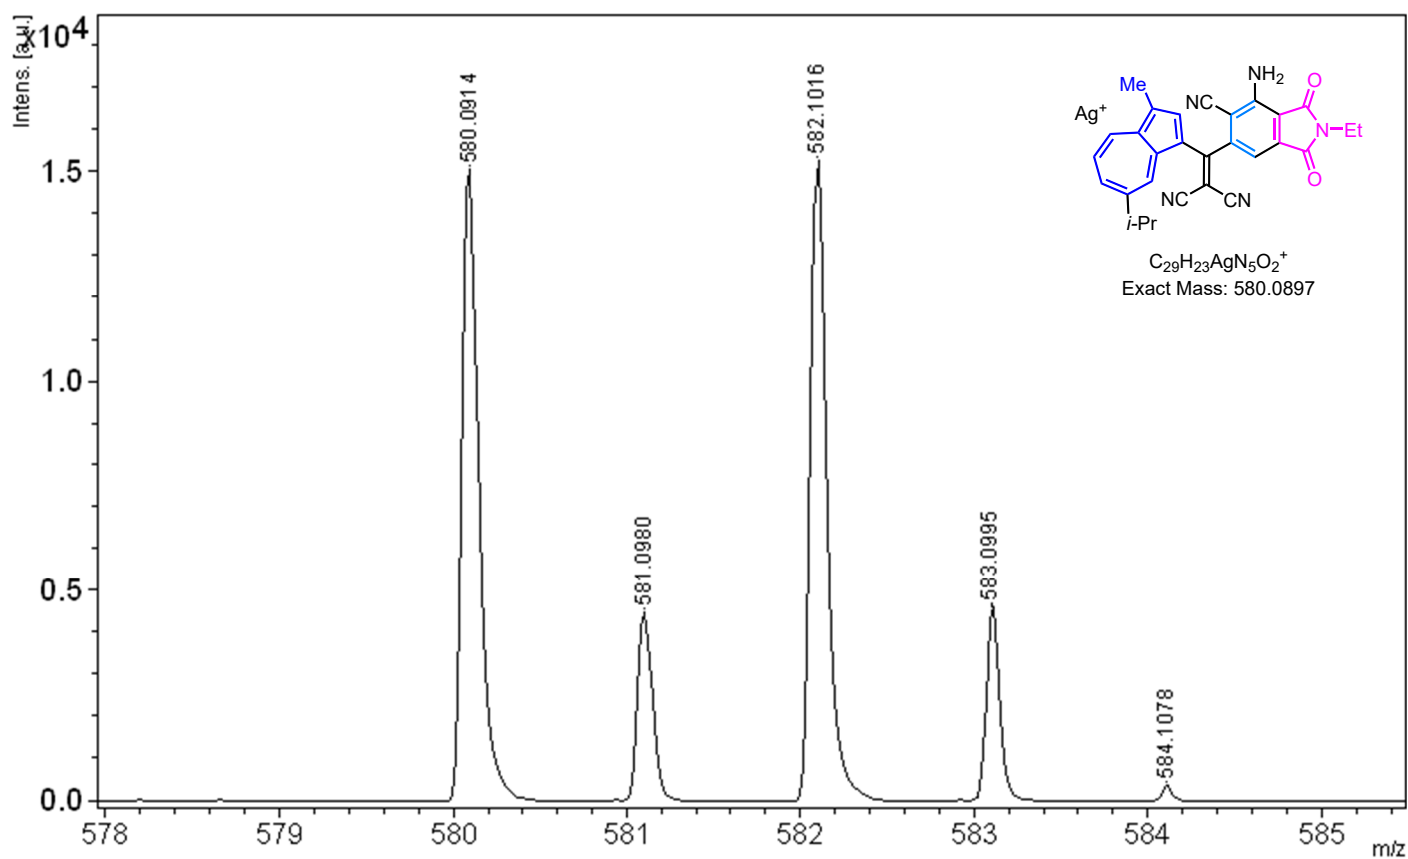

Figure S44. HRMS (MALDI-TOF, positive) of **4f**.

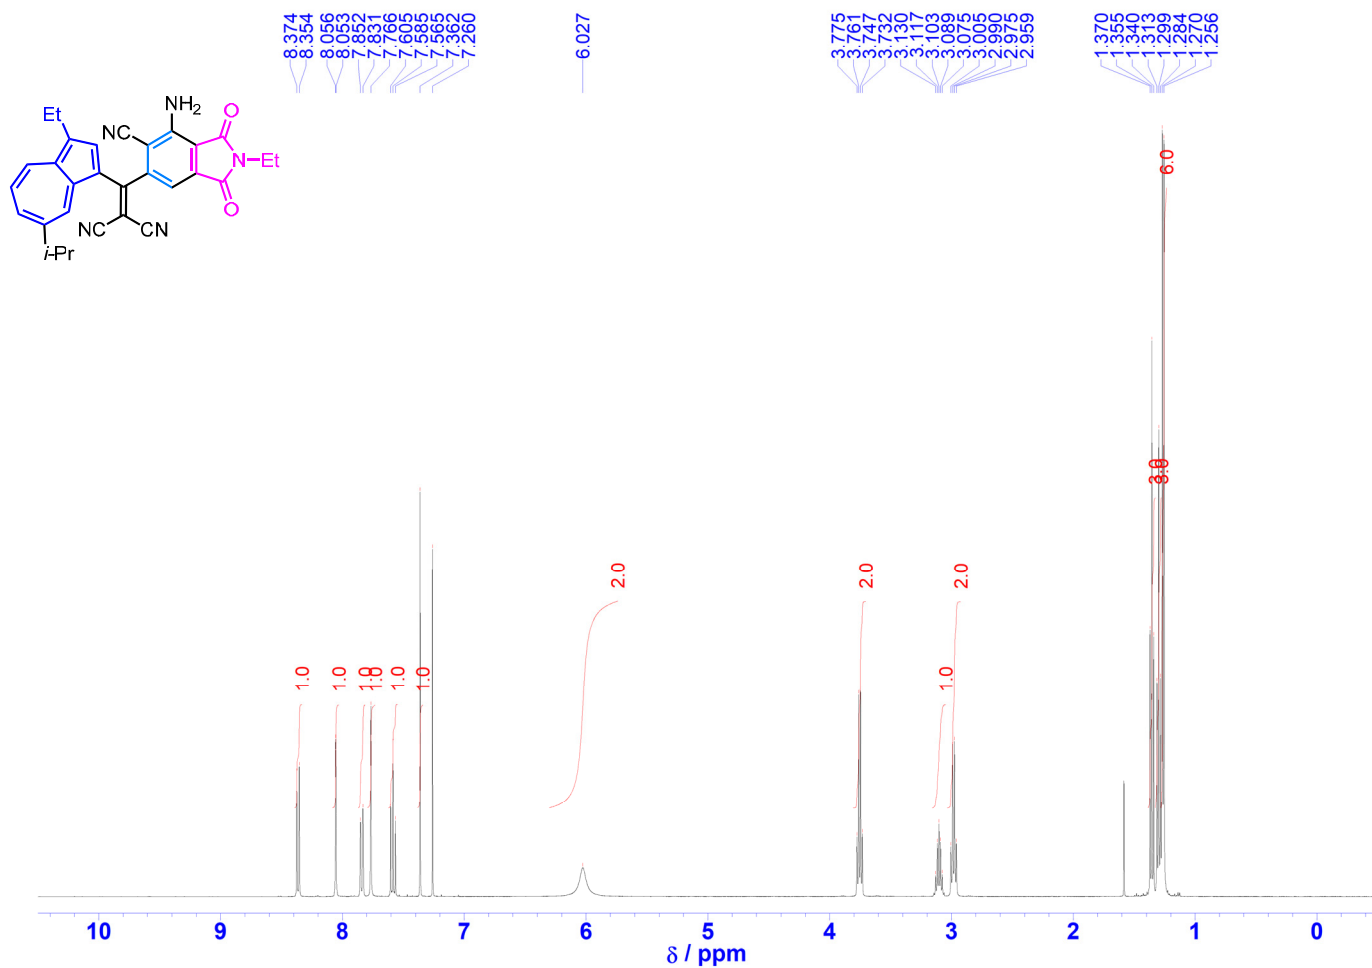

Figure S45. <sup>1</sup>H NMR spectrum of **4f** in CDCl<sub>3</sub> (500 MHz).

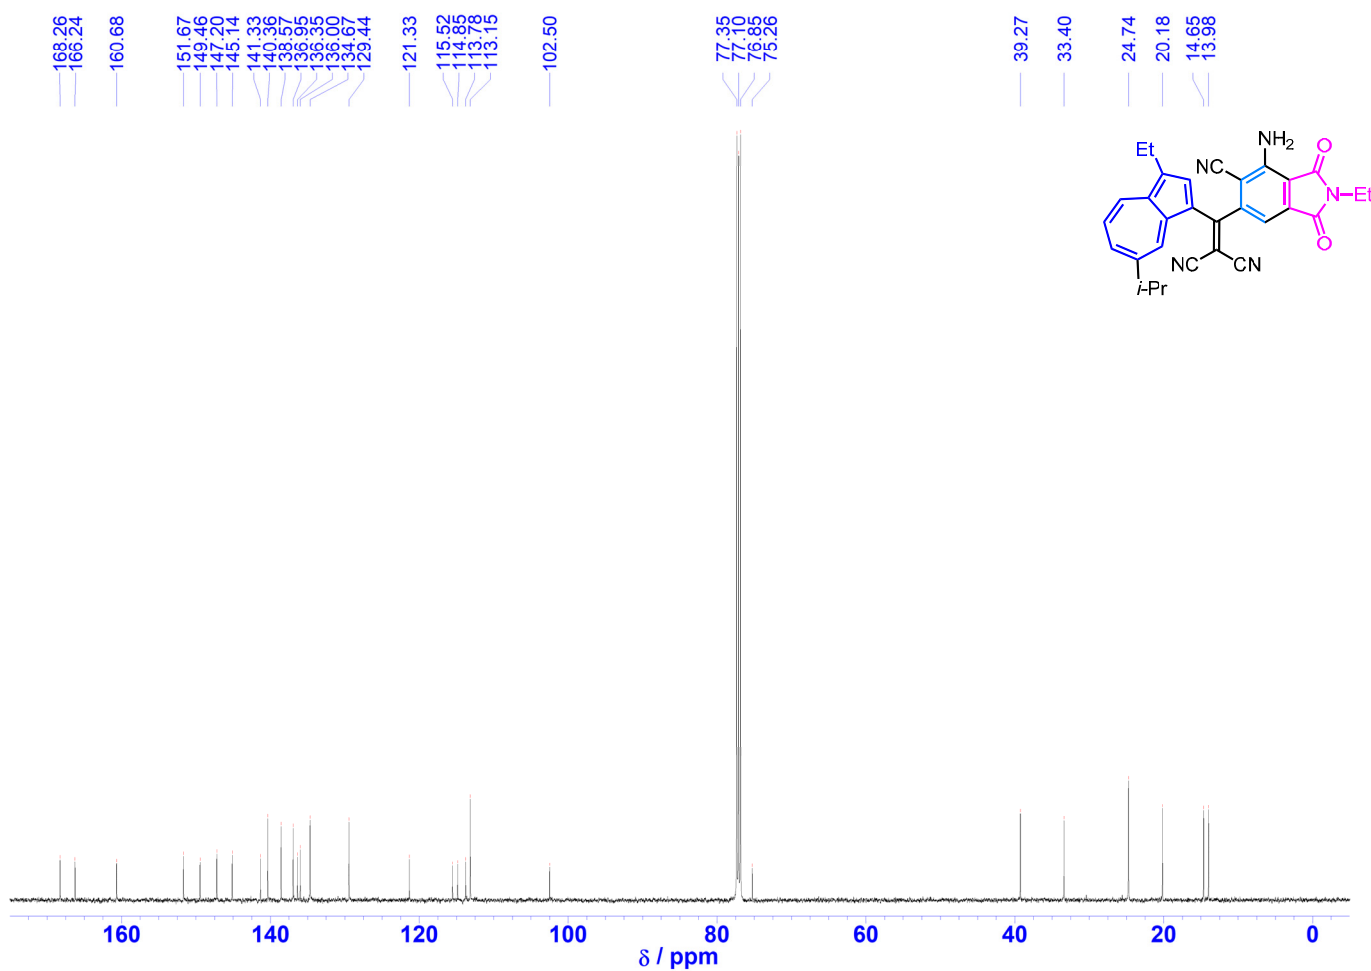

Figure S46. <sup>13</sup>C NMR spectrum of **4f** in CDCl<sub>3</sub> (125 MHz).

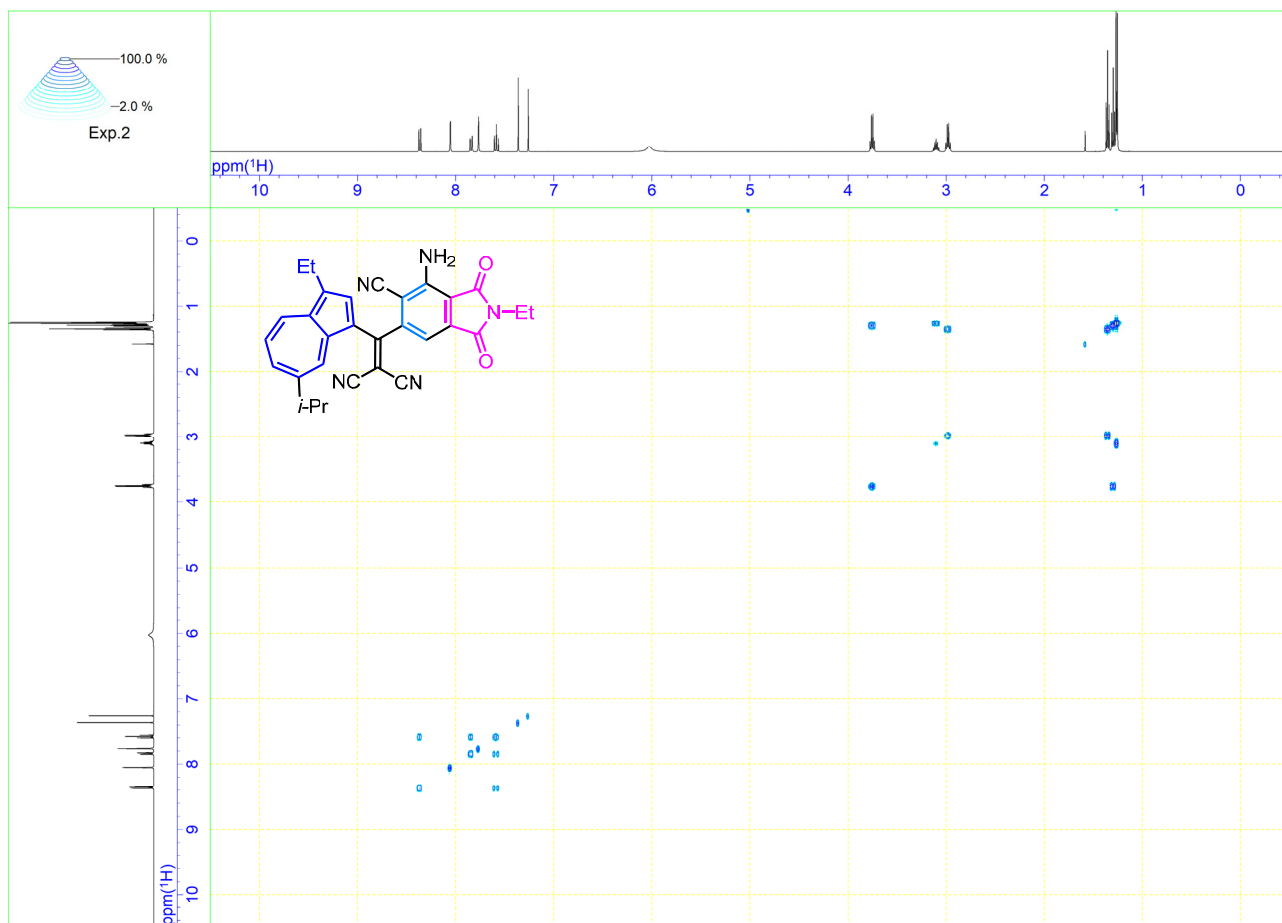

Figure S47. COSY spectrum of **4f** in CDCl<sub>3</sub> (500 MHz).

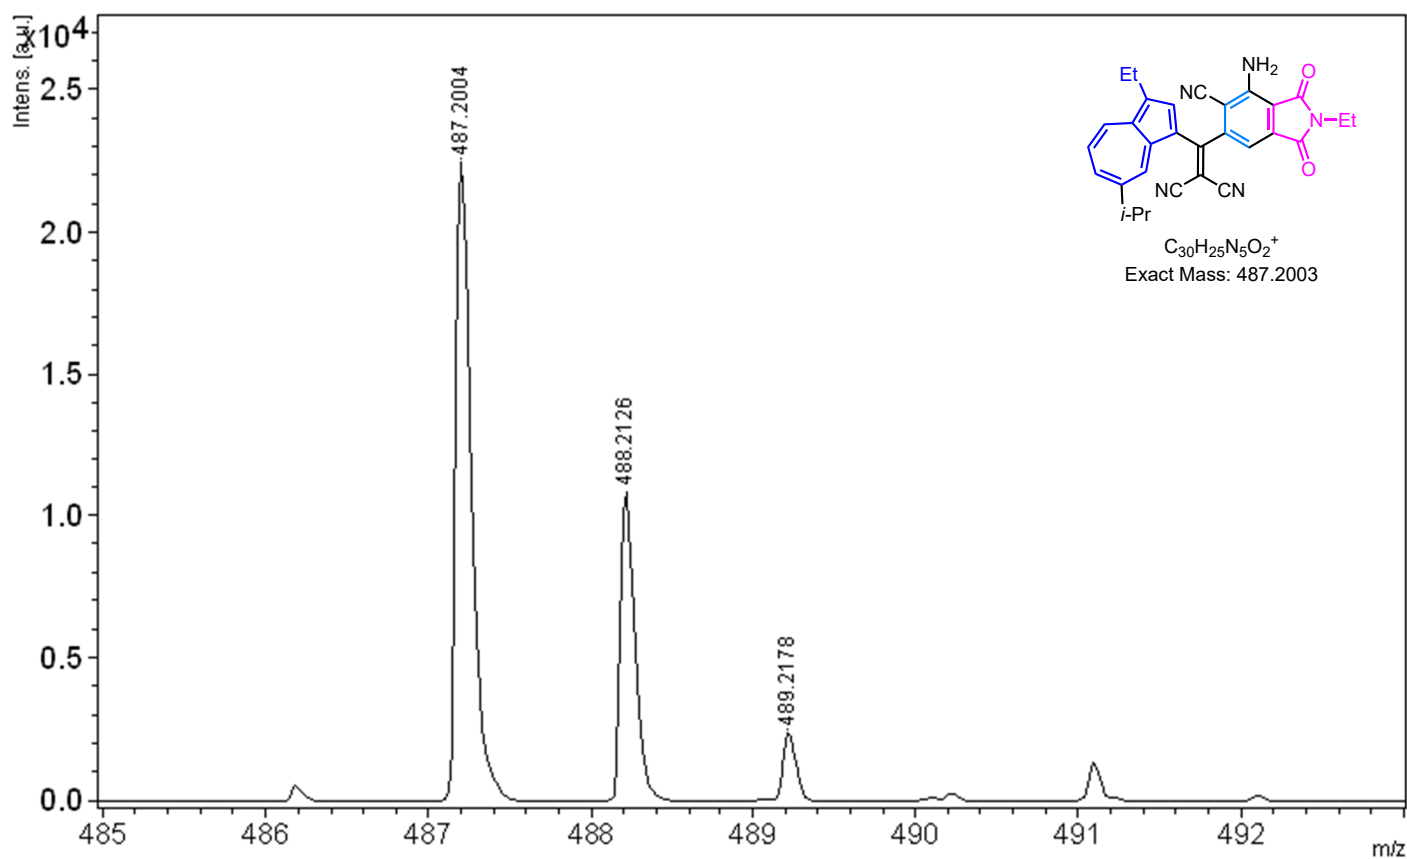

Figure S48. HRMS (MALDI-TOF, positive) of **4f**.

## 2. UV/Vis and fluorescent spectra of 2a–2e and 4a–4g (Figures S49–S86).

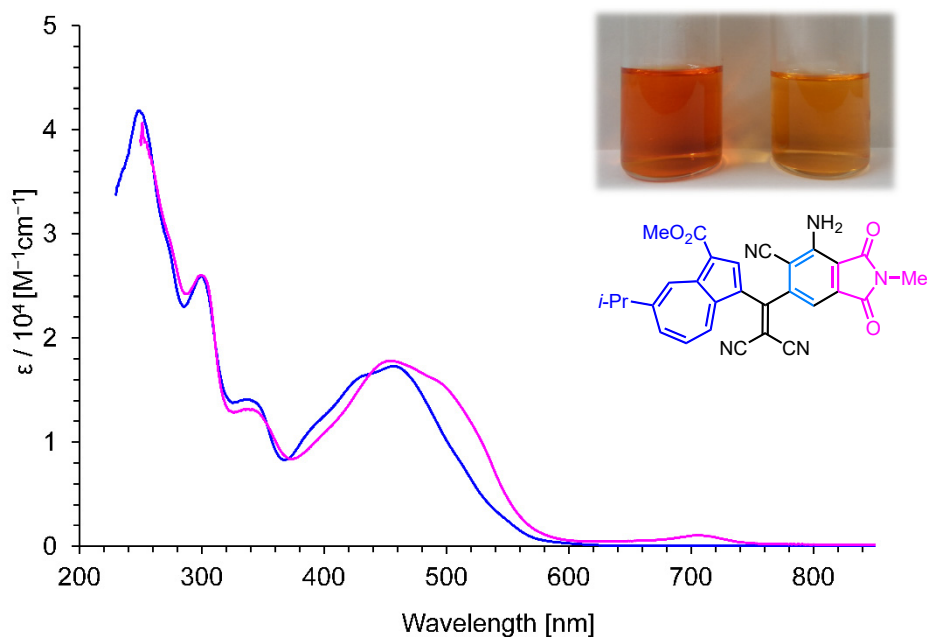

**Figure S49.** UV/Vis spectra of **2a** in  $CH_2Cl_2$  (blue line) and in 30%  $CF_3CO_2H / CH_2Cl_2$  (pink line); photo: in  $CH_2Cl_2$  (left) and in 30%  $CF_3CO_2H / CH_2Cl_2$  (right).

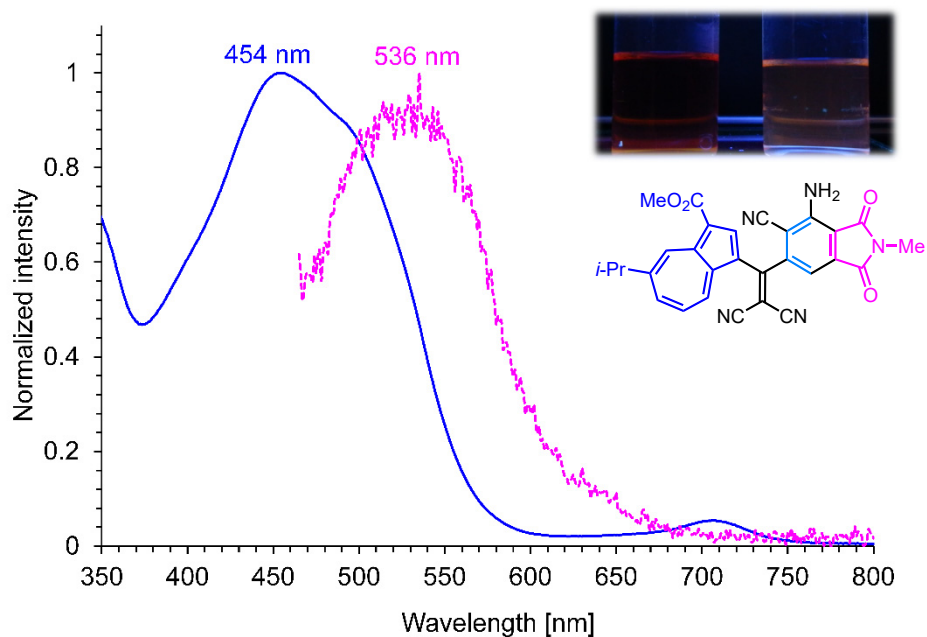

**Figure S50.** UV/Vis spectrum (blue line) and fluorescent spectrum (pink dotted-line) of **2a** in 30%  $CF_3CO_2H / CH_2Cl_2$ ; photo: in  $CH_2Cl_2$  (left) and in 30%  $CF_3CO_2H / CH_2Cl_2$  (right) under the UV-light irradiation at  $\lambda_{ex} = 365$  nm.

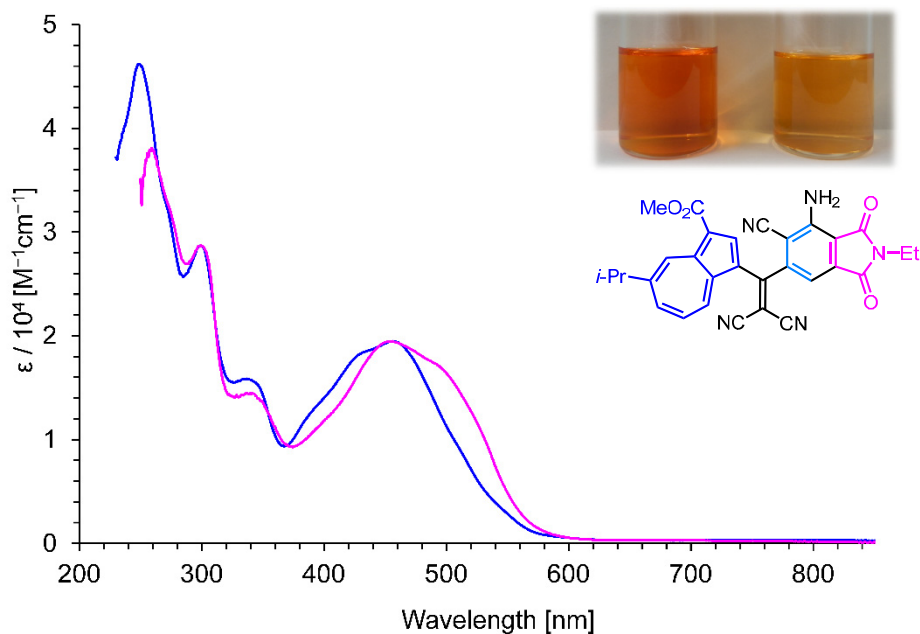

**Figure S51.** UV/Vis spectra of **2b** in  $CH_2Cl_2$  (blue line) and in 30%  $CF_3CO_2H / CH_2Cl_2$  (pink line); photo: in  $CH_2Cl_2$  (left) and in 30%  $CF_3CO_2H / CH_2Cl_2$  (right).

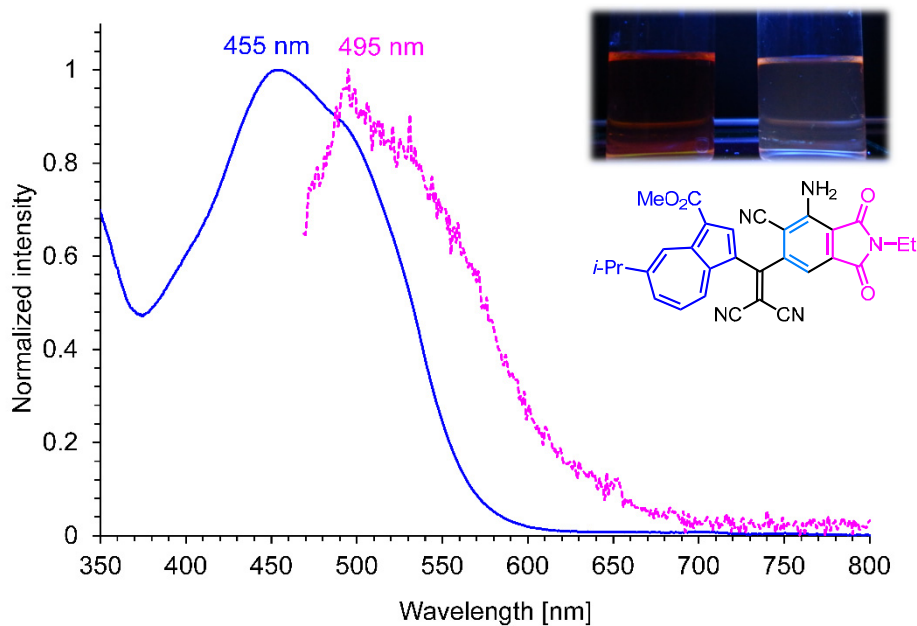

**Figure S52.** UV/Vis spectrum (blue line) and fluorescent spectrum (pink dotted-line) of **2b** in 30%  $CF_3CO_2H / CH_2Cl_2$ ; photo: in  $CH_2Cl_2$  (left) and in 30%  $CF_3CO_2H / CH_2Cl_2$  (right) under the UV-light irradiation at  $\lambda_{ex} = 365$  nm.



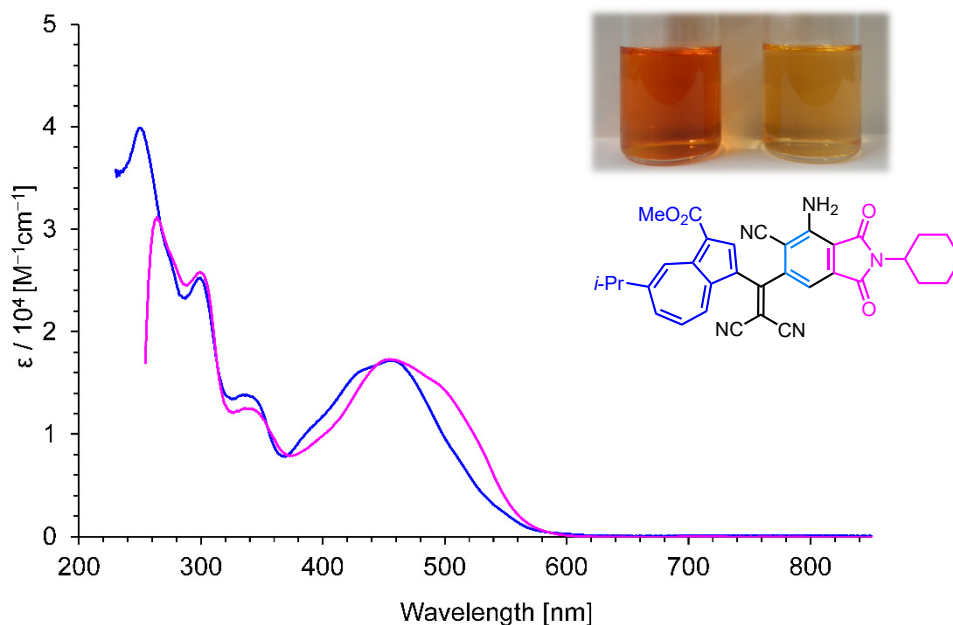

**Figure S53.** UV/Vis spectra of **2c** in  $CH_2Cl_2$  (blue line) and in 30%  $CF_3CO_2H / CH_2Cl_2$  (pink line); photo: in  $CH_2Cl_2$  (left) and in 30%  $CF_3CO_2H / CH_2Cl_2$  (right).

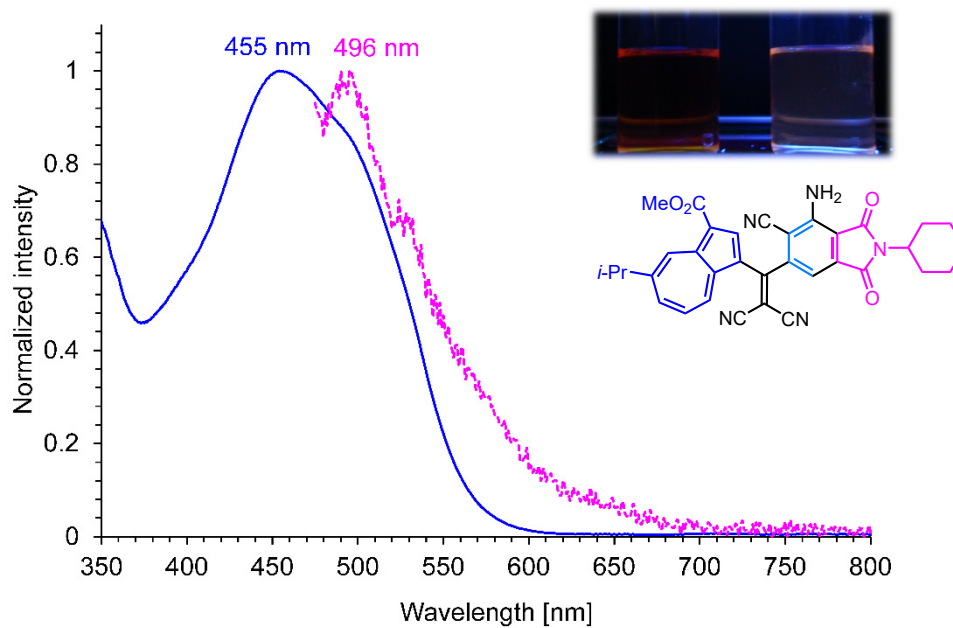

**Figure S54.** UV/Vis spectrum (blue line) and fluorescent spectrum (pink dotted-line) of **2c** in 30%  $CF_3CO_2H / CH_2Cl_2$ ; photo: in  $CH_2Cl_2$  (left) and in 30%  $CF_3CO_2H / CH_2Cl_2$  (right) under the UV-light irradiation at  $\lambda_{ex} = 365$  nm.

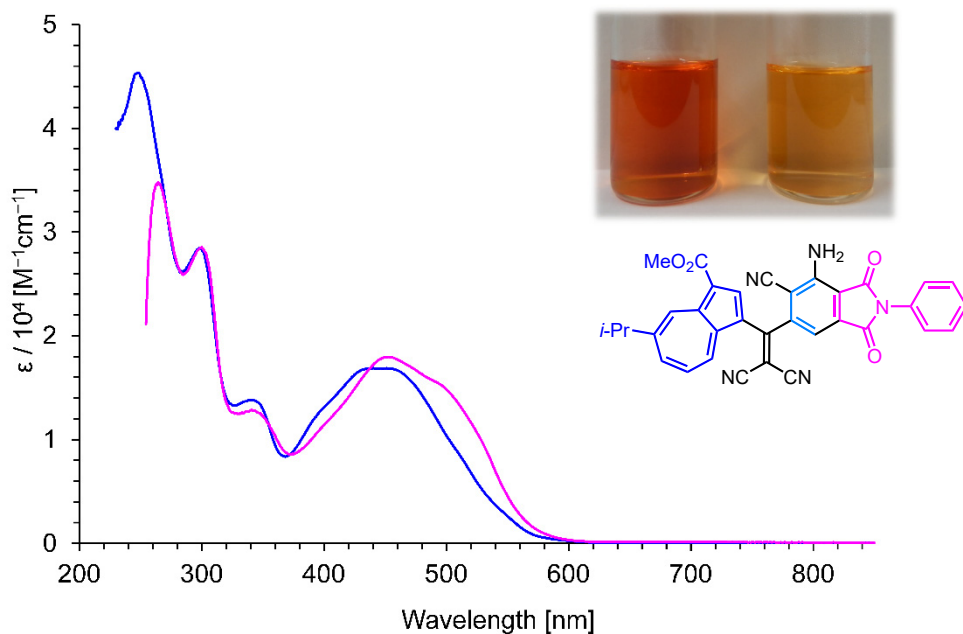

**Figure S55.** UV/Vis spectra of **2d** in  $\text{CH}_2\text{Cl}_2$  (blue line) and in 30%  $\text{CF}_3\text{CO}_2\text{H}/\text{CH}_2\text{Cl}_2$  (pink line); photo: in  $\text{CH}_2\text{Cl}_2$  (left) and in 30%  $\text{CF}_3\text{CO}_2\text{H}/\text{CH}_2\text{Cl}_2$  (right).

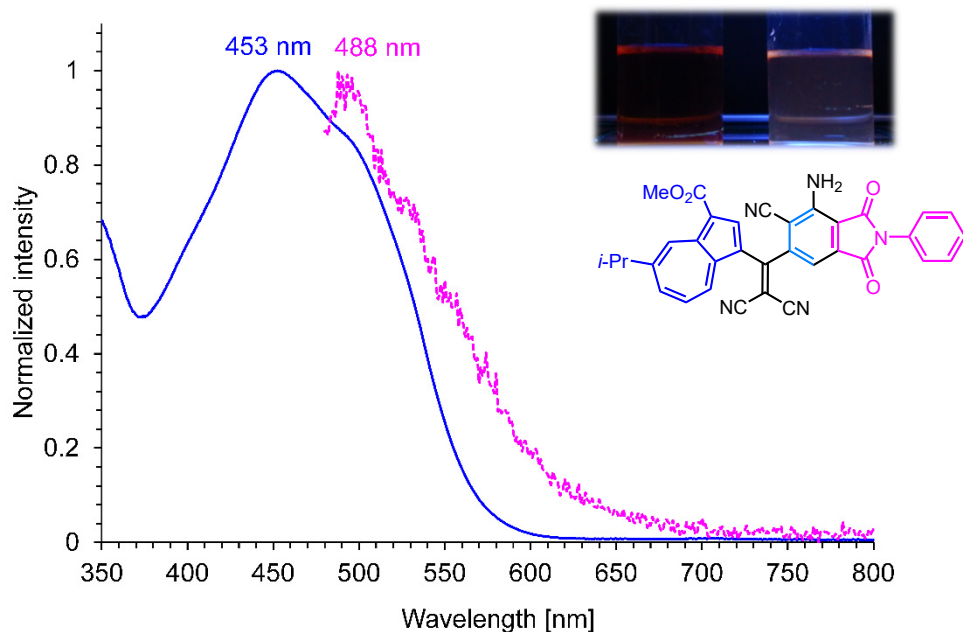

**Figure S56.** UV/Vis spectrum (blue line) and fluorescent spectrum (pink dotted-line) of **2d** in 30%  $\text{CF}_3\text{CO}_2\text{H}/\text{CH}_2\text{Cl}_2$ ; photo: in  $\text{CH}_2\text{Cl}_2$  (left) and in 30%  $\text{CF}_3\text{CO}_2\text{H}/\text{CH}_2\text{Cl}_2$  (right) under the UV-light irradiation at  $\lambda_{\text{ex}} = 365 \text{ nm}$ .

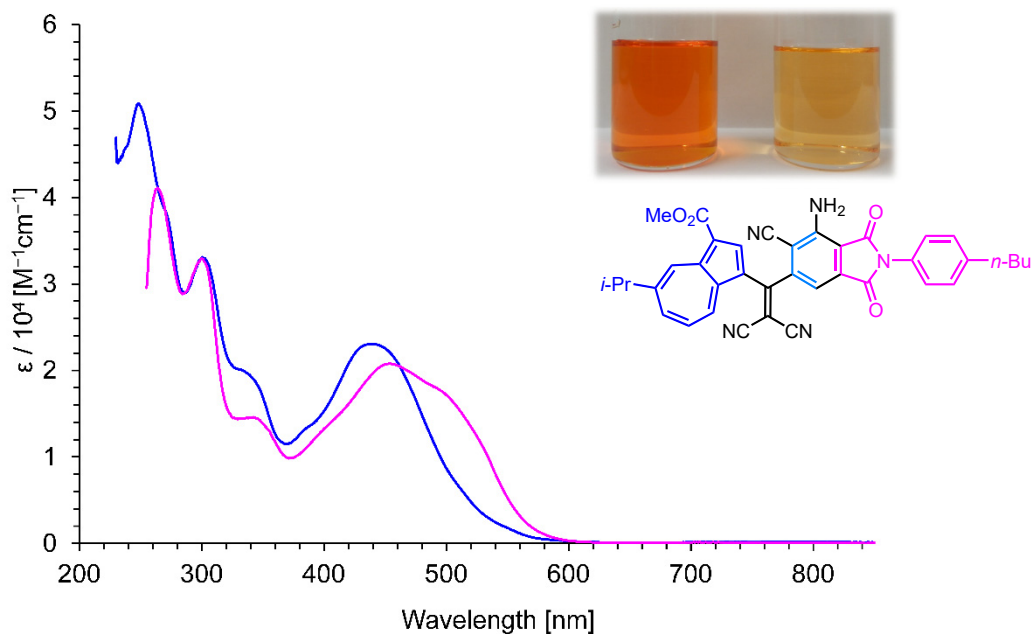

**Figure S57.** UV/Vis spectra of **2e** in  $\text{CH}_2\text{Cl}_2$  (blue line) and in 30%  $\text{CF}_3\text{CO}_2\text{H}/\text{CH}_2\text{Cl}_2$  (pink line); photo: in  $\text{CH}_2\text{Cl}_2$  (left) and in 30%  $\text{CF}_3\text{CO}_2\text{H}/\text{CH}_2\text{Cl}_2$  (right).

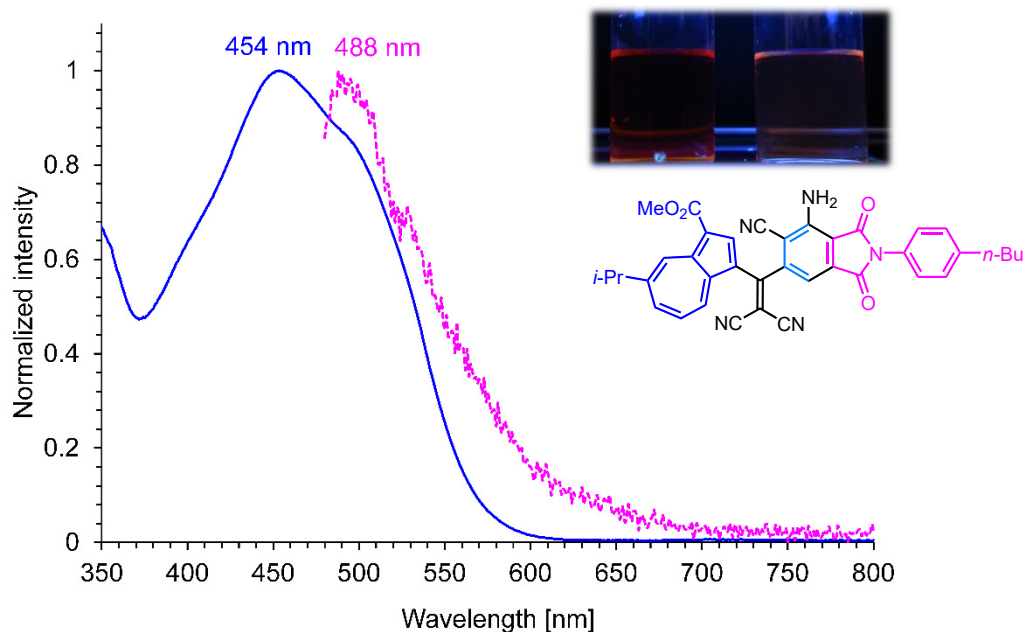

**Figure S58.** UV/Vis spectrum (blue line) and fluorescent spectrum (pink dotted-line) of **2e** in 30%  $\text{CF}_3\text{CO}_2\text{H}/\text{CH}_2\text{Cl}_2$ ; photo: in  $\text{CH}_2\text{Cl}_2$  (left) and in 30%  $\text{CF}_3\text{CO}_2\text{H}/\text{CH}_2\text{Cl}_2$  (right) under the UV-light irradiation at  $\lambda_{\text{ex}} = 365 \text{ nm}$ .

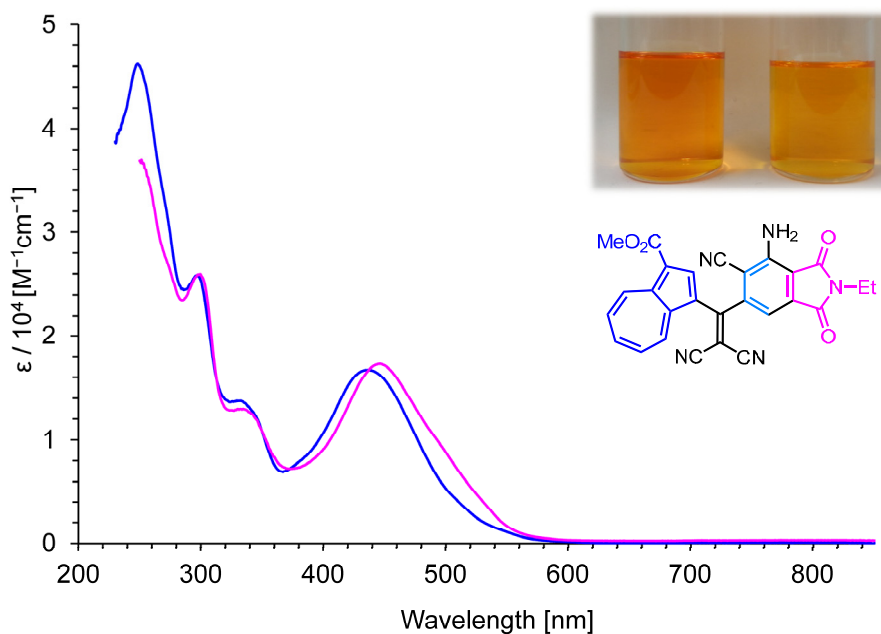

**Figure S59.** UV/Vis spectra of **4a** in  $CH_2Cl_2$  (blue line) and in 30%  $CF_3CO_2H / CH_2Cl_2$  (pink line); photo: in  $CH_2Cl_2$  (left) and in 30%  $CF_3CO_2H / CH_2Cl_2$  (right).

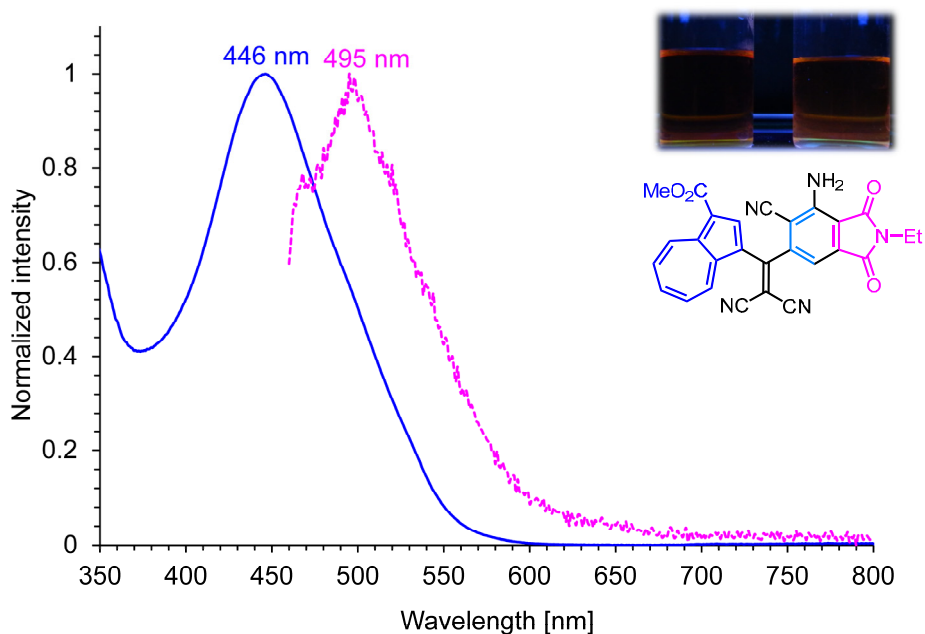

**Figure S60.** UV/Vis spectrum (blue line) and fluorescent spectrum (pink dotted-line) of **4a** in 30%  $CF_3CO_2H / CH_2Cl_2$ ; photo: in  $CH_2Cl_2$  (left) and in 30%  $CF_3CO_2H / CH_2Cl_2$  (right) under the UV-light irradiation at  $\lambda_{ex} = 365$  nm.

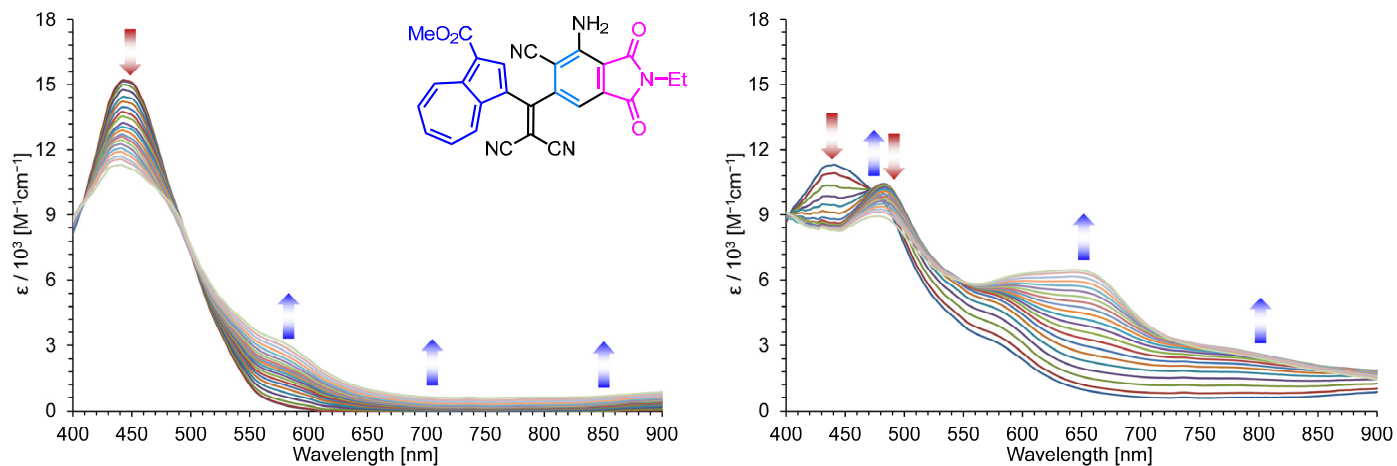

**Figure S61.** Continuous change in the visible spectrum of **4a**: constant-voltage electrochemical reduction at  $-1.20$  V (left) and further reduction at  $-1.60$  V (right) in benzonitrile containing  $Et_4NClO_4$  (0.1 M) at 20 sec intervals.

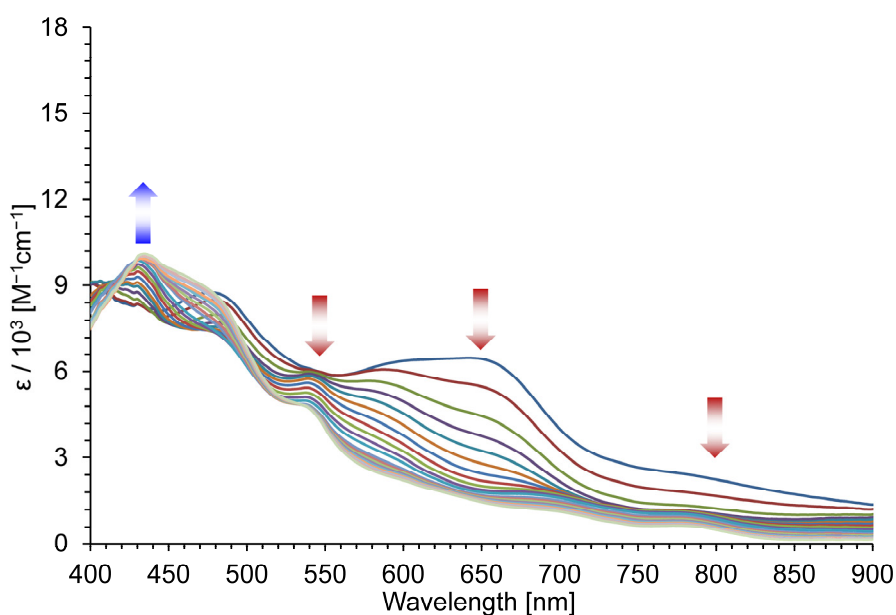

**Figure S62.** Continuous change in the visible spectrum of **4a**: constant-voltage electrochemical oxidation of the reduced species at  $\pm 0.00$  V in benzonitrile containing  $Et_4NClO_4$  (0.1 M) at 20 sec intervals.

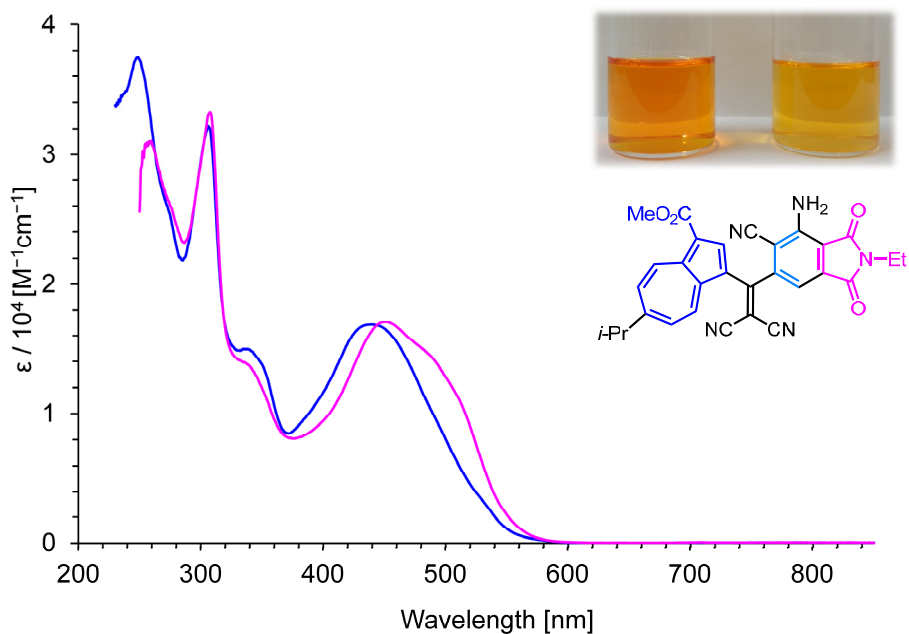

**Figure S63.** UV/Vis spectra of **4b** in CH<sub>2</sub>Cl<sub>2</sub> (blue line) and in 30% CF<sub>3</sub>CO<sub>2</sub>H/ CH<sub>2</sub>Cl<sub>2</sub> (pink line); photo: in CH<sub>2</sub>Cl<sub>2</sub> (left) and in 30% CF<sub>3</sub>CO<sub>2</sub>H/ CH<sub>2</sub>Cl<sub>2</sub> (right).

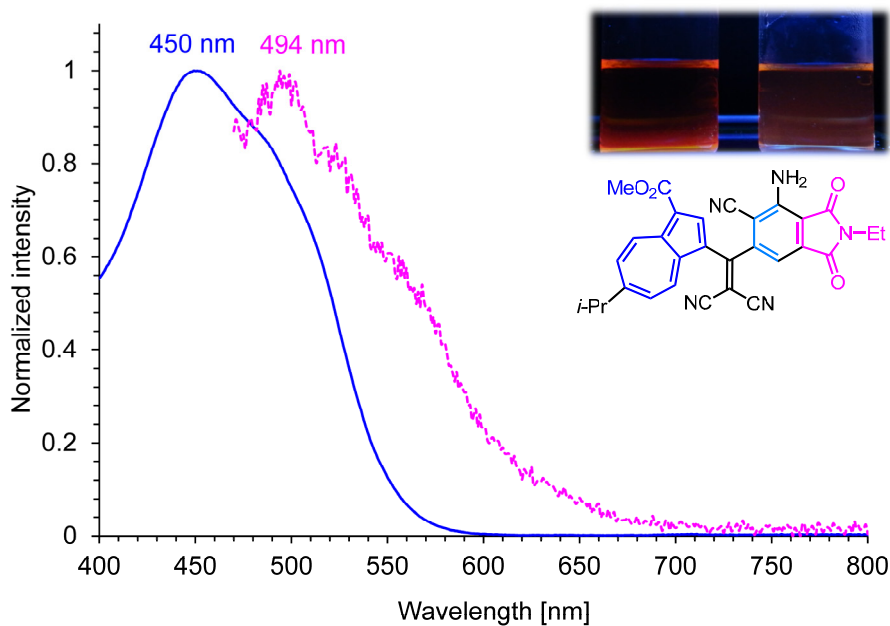

**Figure S64.** UV/Vis spectrum (blue line) and fluorescent spectrum (pink dotted-line) of **4b** in 30% CF<sub>3</sub>CO<sub>2</sub>H/ CH<sub>2</sub>Cl<sub>2</sub>; photo: in CH<sub>2</sub>Cl<sub>2</sub> (left) and in 30% CF<sub>3</sub>CO<sub>2</sub>H/ CH<sub>2</sub>Cl<sub>2</sub> (right) under the UV-light irradiation at  $\lambda_{\text{ex}} = 365$  nm.

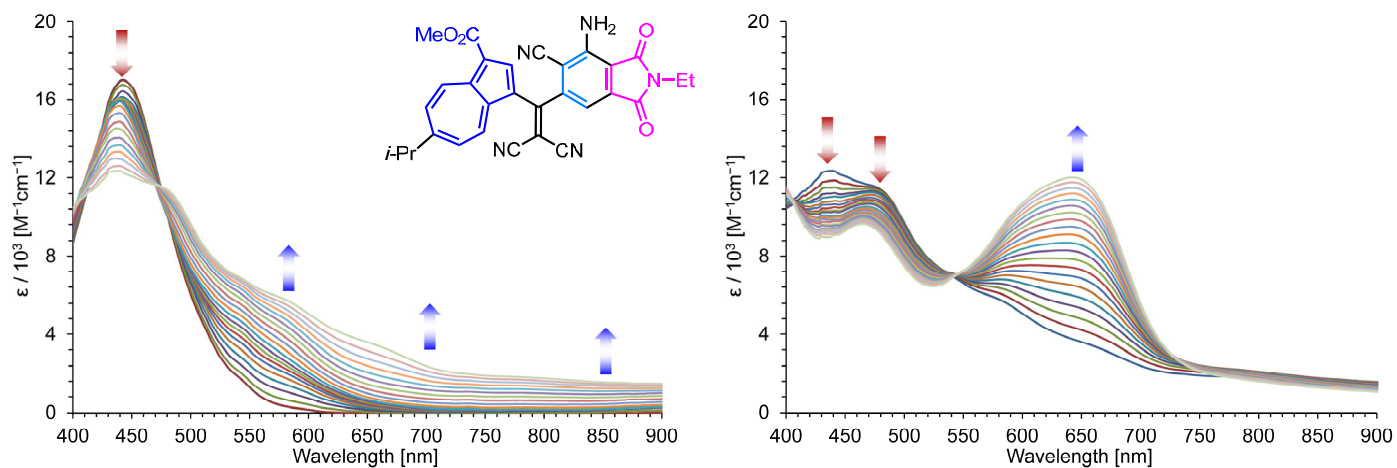

**Figure S65.** Continuous change in the visible spectrum of **4b**: constant-voltage electrochemical reduction at  $-1.15$  V (left) and further reduction at  $-1.60$  V (right) in benzonitrile containing Et $_4$ NCIO $_4$  (0.1 M) at 20 sec intervals.

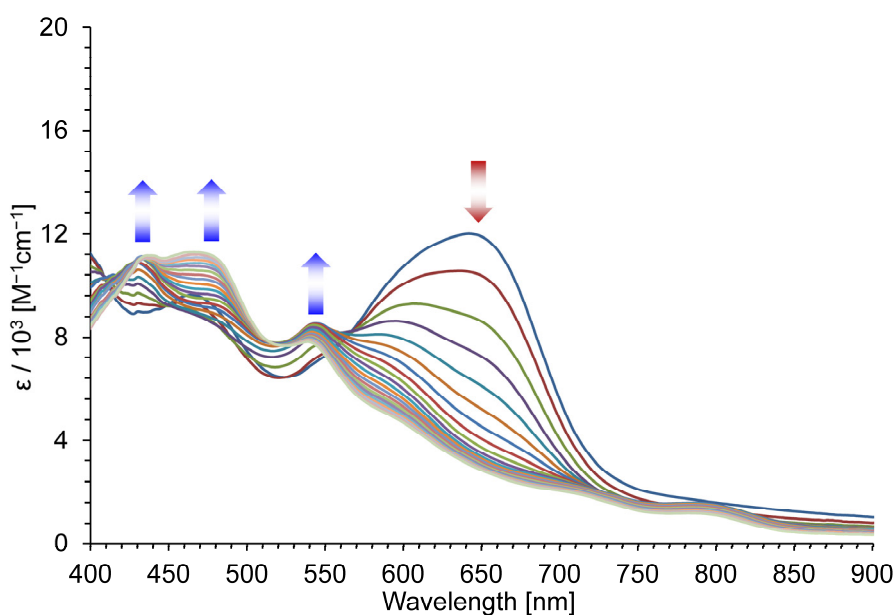

**Figure S66.** Continuous change in the visible spectrum of **4b**: constant-voltage electrochemical oxidation of the reduced species at  $\pm 0.00$  V in benzonitrile containing Et $_4$ NCIO $_4$  (0.1 M) at 20 sec intervals.

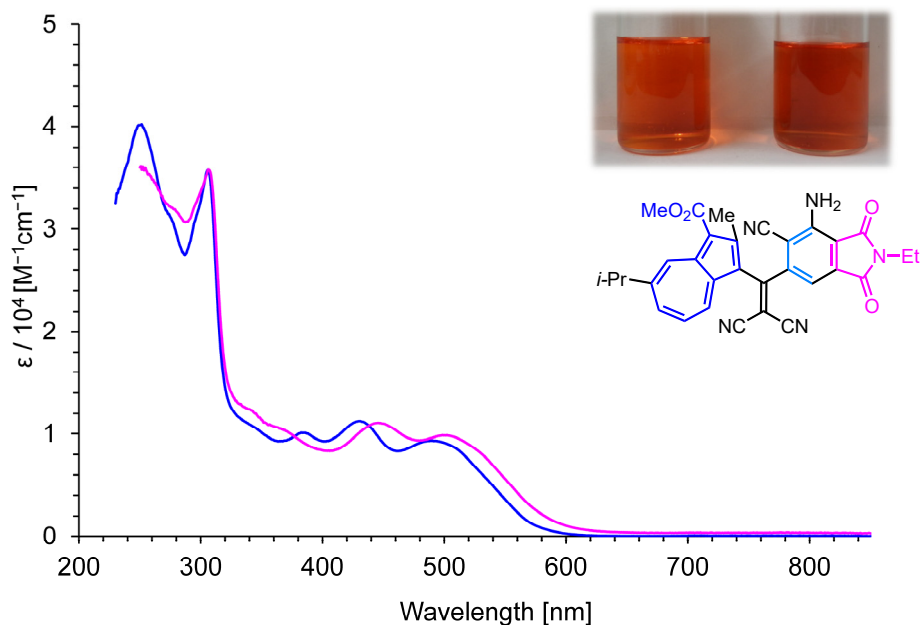

**Figure S67.** UV/Vis spectra of **4c** in  $CH_2Cl_2$  (blue line) and in 30%  $CF_3CO_2H / CH_2Cl_2$  (pink line); photo: in  $CH_2Cl_2$  (left) and in 30%  $CF_3CO_2H / CH_2Cl_2$  (right).

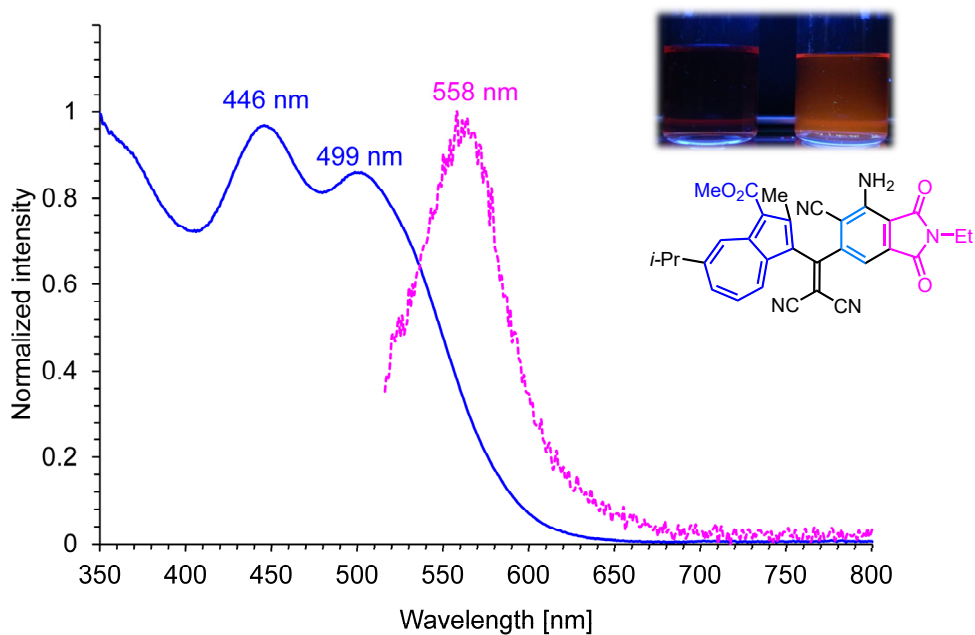

**Figure S68.** UV/Vis spectrum (blue line) and fluorescent spectrum (pink dotted-line) of **4c** in 30%  $CF_3CO_2H / CH_2Cl_2$ ; photo: in  $CH_2Cl_2$  (left) and in 30%  $CF_3CO_2H / CH_2Cl_2$  (right) under the UV-light irradiation at  $\lambda_{ex} = 365$  nm.



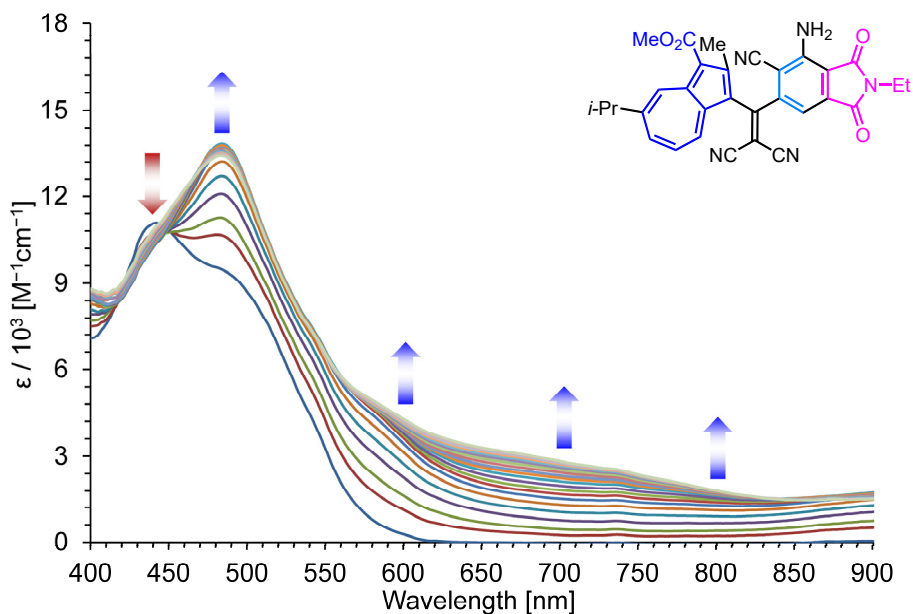

**Figure S69.** Continuous change in the visible spectrum of **4c**: constant-voltage electrochemical reduction at  $-1.60$  V in benzonitrile containing  $\text{Et}_4\text{NClO}_4$  (0.1 M) at 20 sec intervals.

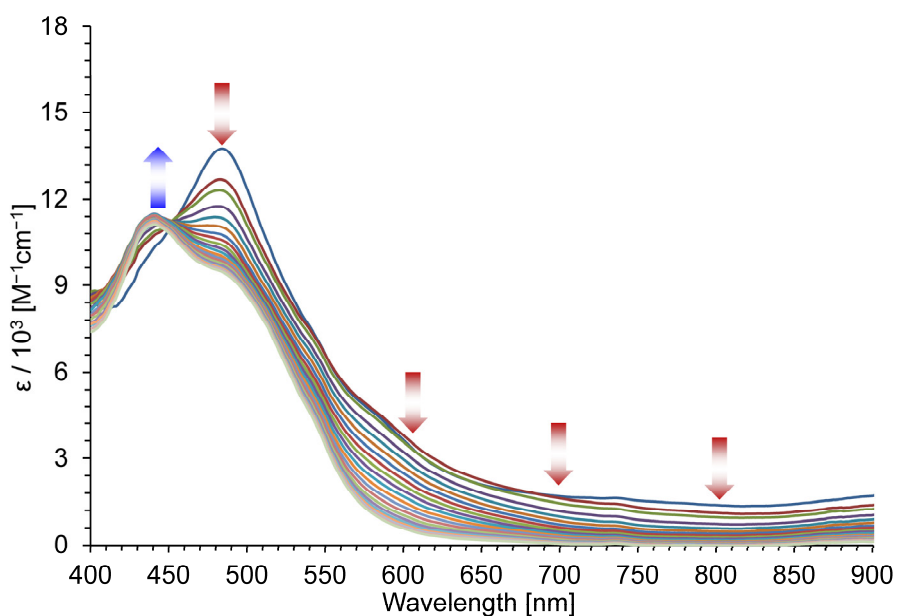

**Figure S70.** Continuous change in the visible spectrum of **4c**: constant-voltage electrochemical oxidation of the reduced species at  $\pm 0.00$  V in benzonitrile containing  $\text{Et}_4\text{NClO}_4$  (0.1 M) at 20 sec intervals.

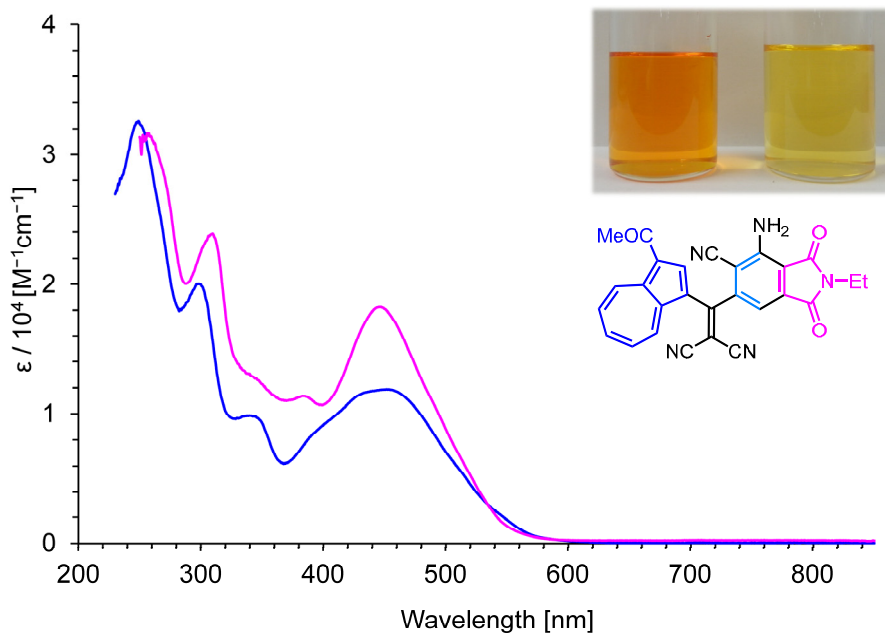

**Figure S71.** UV/Vis spectra of **4d** in  $CH_2Cl_2$  (blue line) and in 30%  $CF_3CO_2H / CH_2Cl_2$  (pink line); photo: in  $CH_2Cl_2$  (left) and in 30%  $CF_3CO_2H / CH_2Cl_2$  (right).

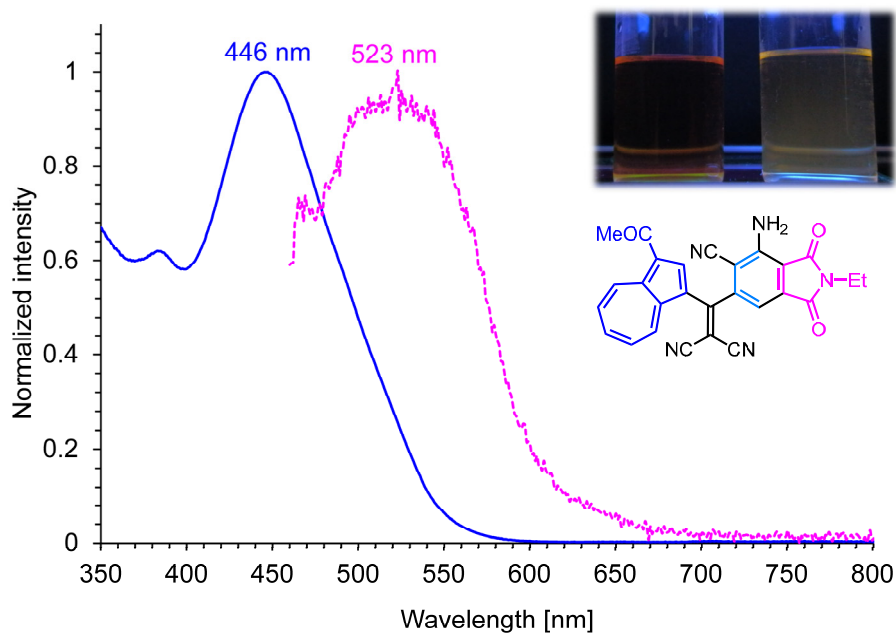

**Figure S72.** UV/Vis spectrum (blue line) and fluorescent spectrum (pink dotted-line) of **4d** in 30%  $CF_3CO_2H / CH_2Cl_2$ ; photo: in  $CH_2Cl_2$  (left) and in 30%  $CF_3CO_2H / CH_2Cl_2$  (right) under the UV-light irradiation at  $\lambda_{ex} = 365$  nm.

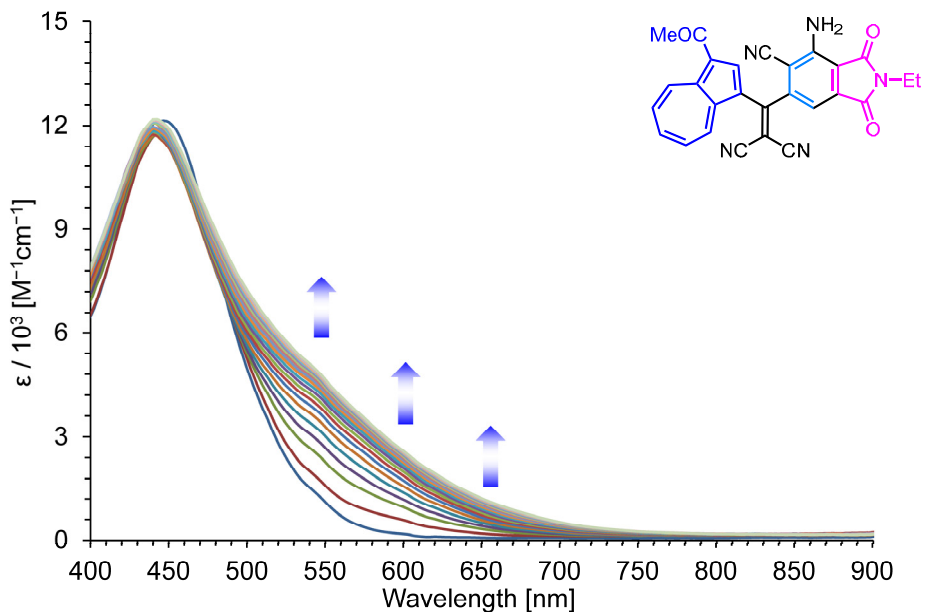

**Figure S73.** Continuous change in the visible spectrum of **4d**: constant-voltage electrochemical reduction at  $-2.00$  V in benzonitrile containing  $\text{Et}_4\text{NClO}_4$  ( $0.1$  M) at 20 sec intervals.

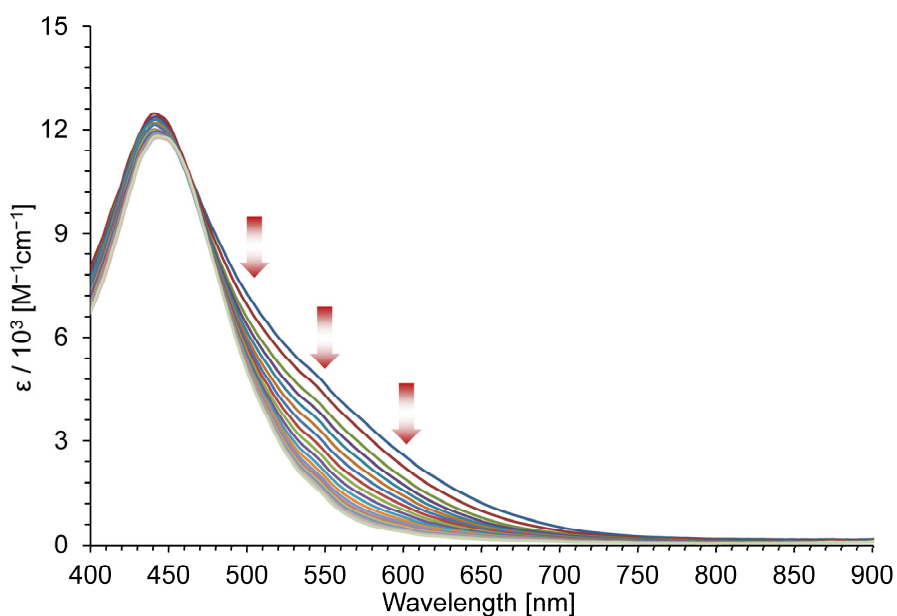

**Figure S74.** Continuous change in the visible spectrum of **4d**: constant-voltage electrochemical oxidation of the reduced species at  $\pm 0.00$  V in benzonitrile containing  $\text{Et}_4\text{NClO}_4$  ( $0.1$  M) at 20 sec intervals.

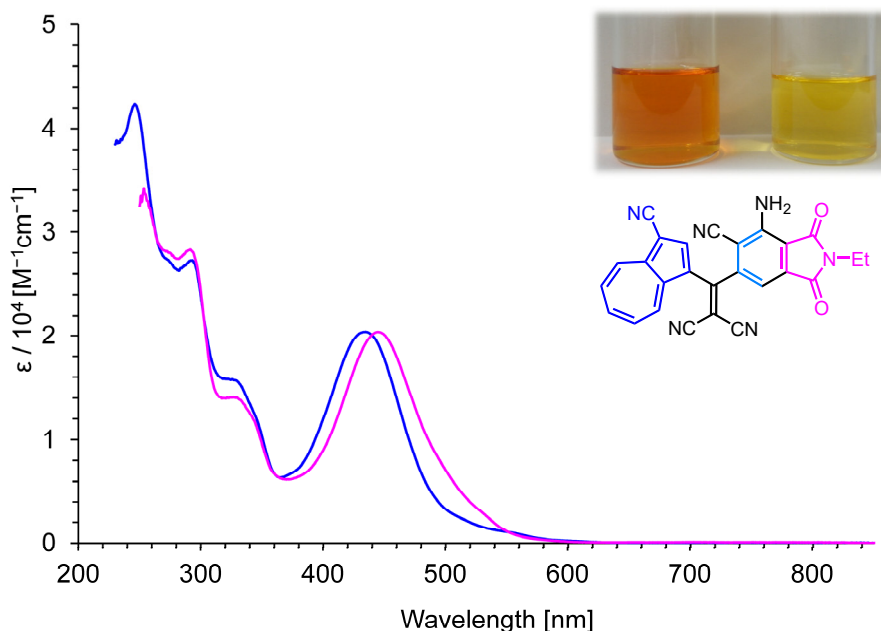

**Figure S75.** UV/Vis spectra of **4e** in  $\text{CH}_2\text{Cl}_2$  (blue line) and in 30%  $\text{CF}_3\text{CO}_2\text{H}/\text{CH}_2\text{Cl}_2$  (pink line); photo: in  $\text{CH}_2\text{Cl}_2$  (left) and in 30%  $\text{CF}_3\text{CO}_2\text{H}/\text{CH}_2\text{Cl}_2$  (right).

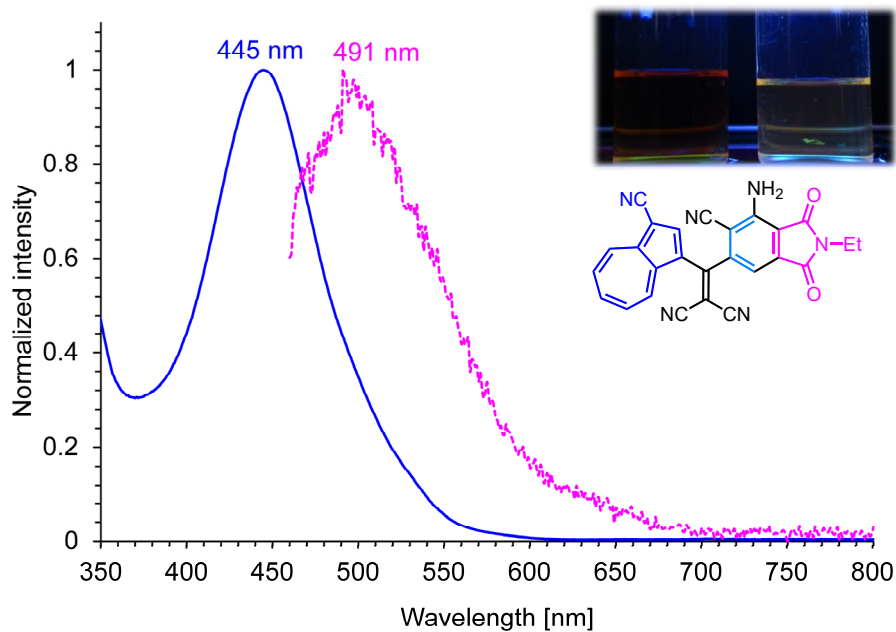

**Figure S76.** UV/Vis spectrum (blue line) and fluorescent spectrum (pink dotted-line) of **4e** in 30%  $\text{CF}_3\text{CO}_2\text{H}/\text{CH}_2\text{Cl}_2$ ; photo: in  $\text{CH}_2\text{Cl}_2$  (left) and in 30%  $\text{CF}_3\text{CO}_2\text{H}/\text{CH}_2\text{Cl}_2$  (right) under the UV-light irradiation at  $\lambda_{\text{ex}} = 365 \text{ nm}$ .

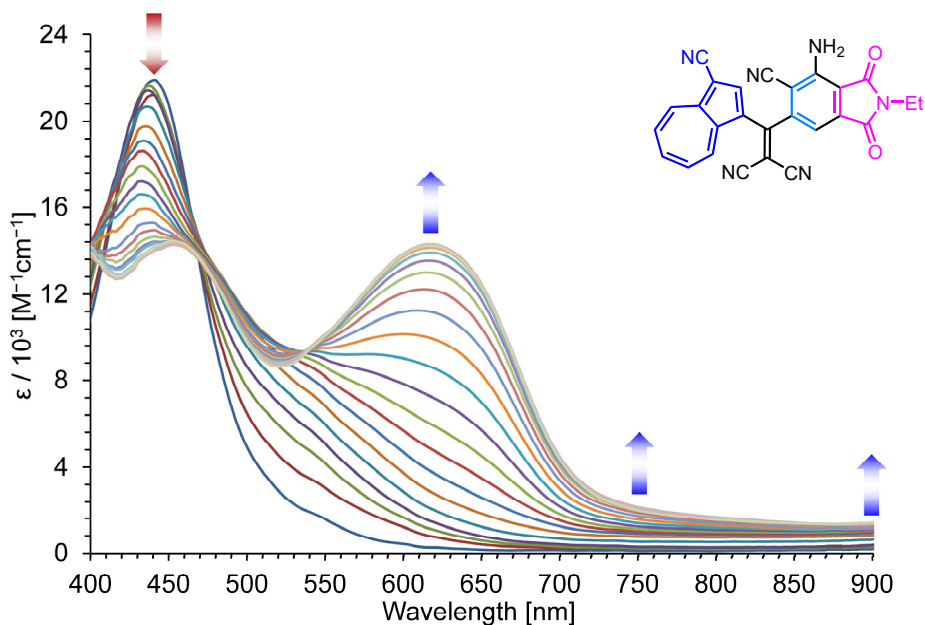

**Figure S77.** Continuous change in the visible spectrum of **4e**: constant-voltage electrochemical reduction at  $-2.00$  V in benzonitrile containing  $\text{Et}_4\text{NClO}_4$  ( $0.1$  M) at 20 sec intervals.

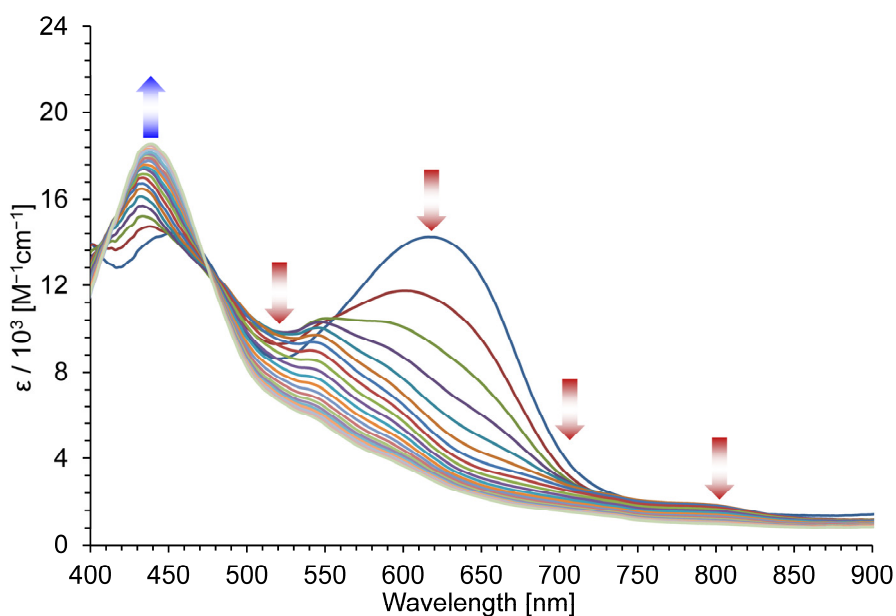

**Figure S78.** Continuous change in the visible spectrum of **4e**: constant-voltage electrochemical oxidation of the reduced species at  $\pm 0.00$  V in benzonitrile containing  $\text{Et}_4\text{NClO}_4$  ( $0.1$  M) at 20 sec intervals.

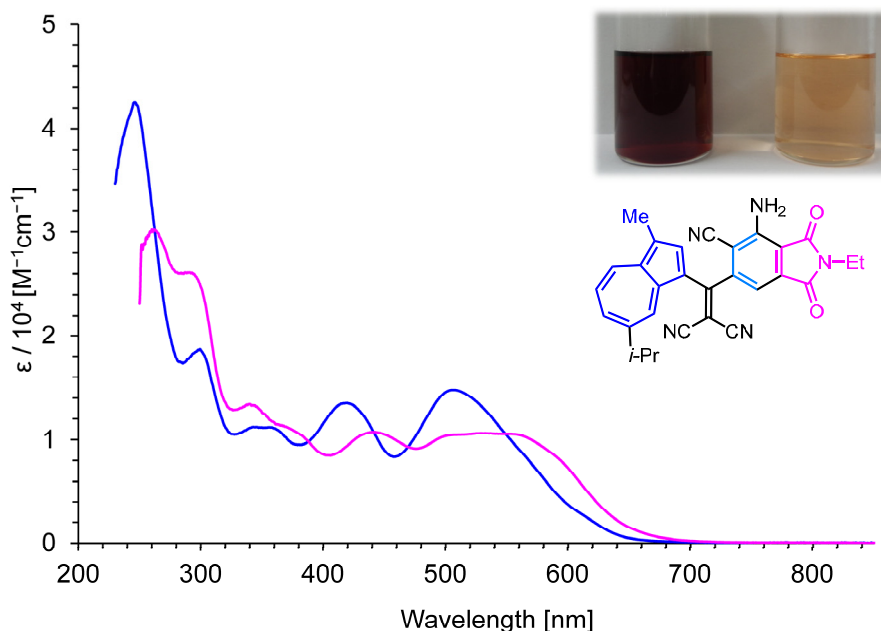

**Figure S79.** UV/Vis spectra of **4f** in  $\text{CH}_2\text{Cl}_2$  (blue line) and in 30%  $\text{CF}_3\text{CO}_2\text{H}/\text{CH}_2\text{Cl}_2$  (pink line); photo: in  $\text{CH}_2\text{Cl}_2$  (left) and in 30%  $\text{CF}_3\text{CO}_2\text{H}/\text{CH}_2\text{Cl}_2$  (right).

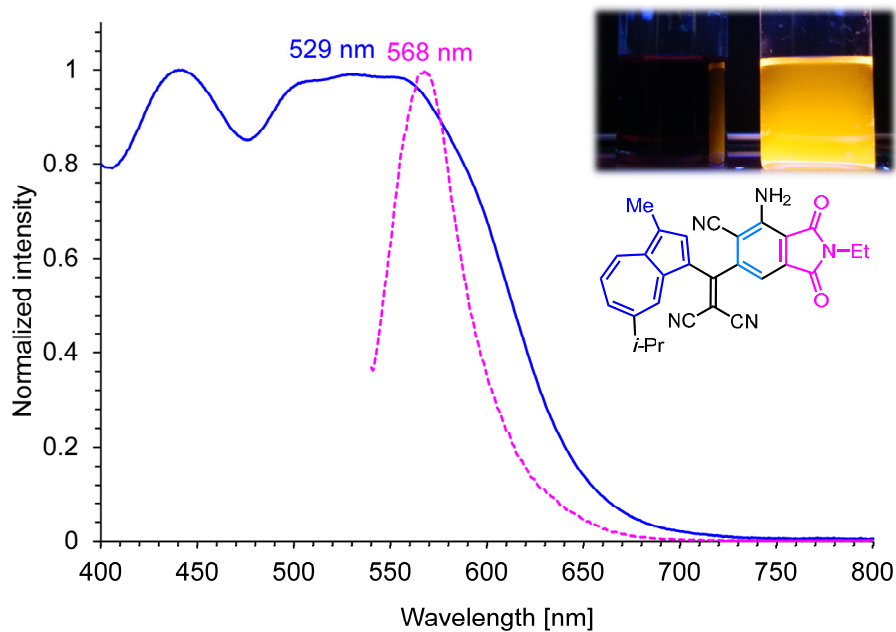

**Figure S80.** UV/Vis spectrum (blue line) and fluorescent spectrum (pink dotted-line) of **4f** in 30%  $\text{CF}_3\text{CO}_2\text{H}/\text{CH}_2\text{Cl}_2$ ; photo: in  $\text{CH}_2\text{Cl}_2$  (left) and in 30%  $\text{CF}_3\text{CO}_2\text{H}/\text{CH}_2\text{Cl}_2$  (right) under the UV-light irradiation at  $\lambda_{\text{ex}} = 365 \text{ nm}$ .

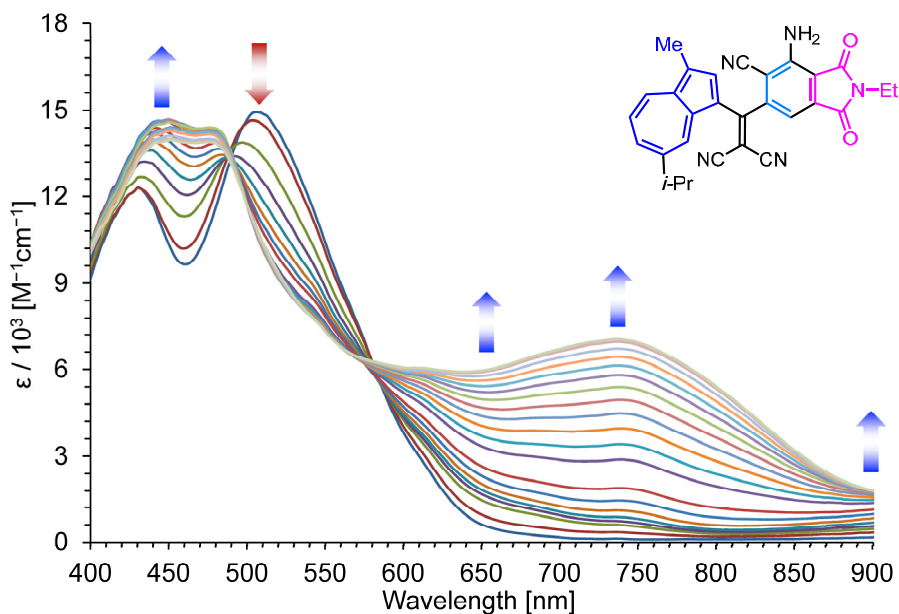

**Figure S81.** Continuous change in the visible spectrum of **4f**: constant-voltage electrochemical reduction at  $-2.00$  V in benzonitrile containing  $\text{Et}_4\text{NClO}_4$  (0.1 M) at 20 sec intervals.

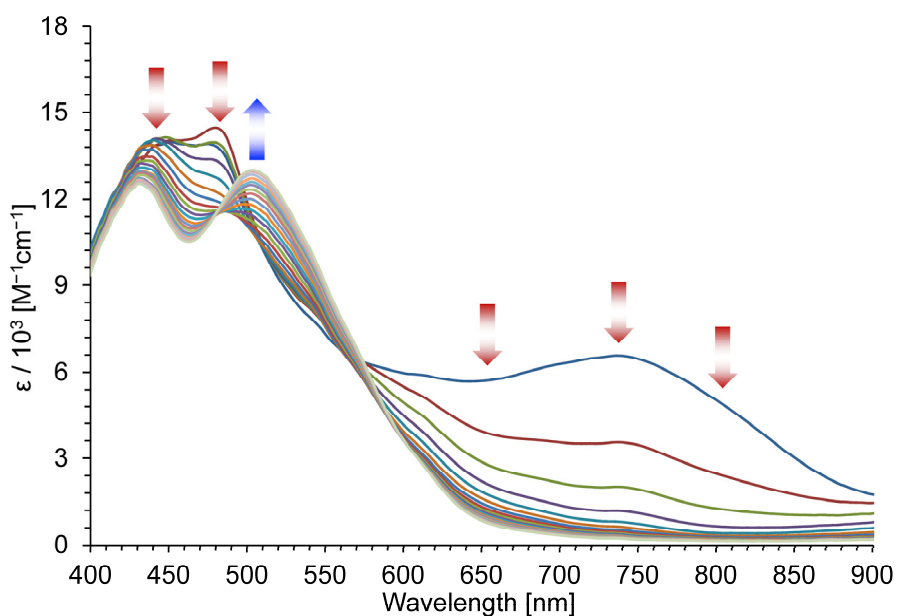

**Figure S82.** Continuous change in the visible spectrum of **4f**: constant-voltage electrochemical oxidation of the reduced species at  $\pm 0.00$  V in benzonitrile containing  $\text{Et}_4\text{NClO}_4$  (0.1 M) at 20 sec intervals.

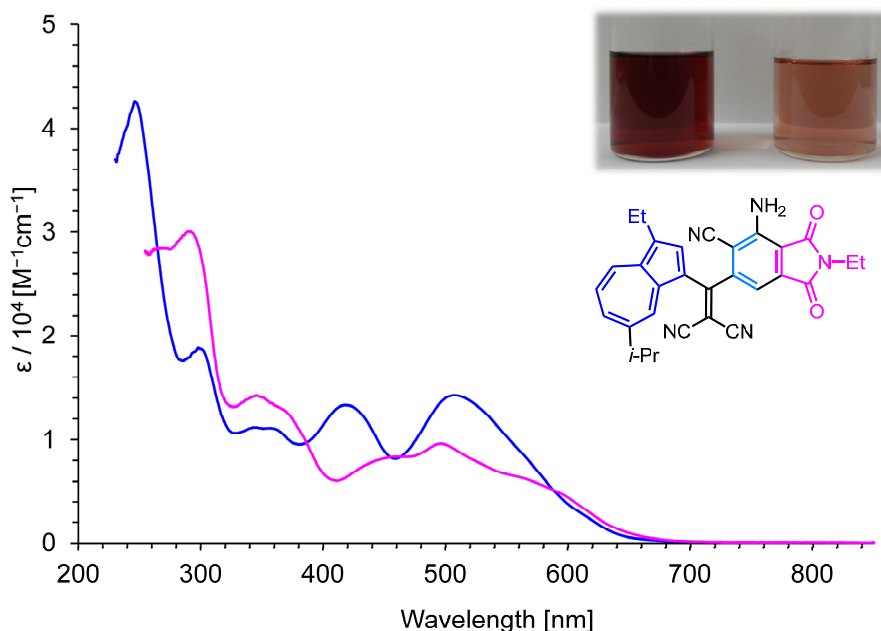

**Figure S83.** UV/Vis spectra of **4g** in  $\text{CH}_2\text{Cl}_2$  (blue line) and in 30%  $\text{CF}_3\text{CO}_2\text{H}/\text{CH}_2\text{Cl}_2$  (pink line); photo: in  $\text{CH}_2\text{Cl}_2$  (left) and in 30%  $\text{CF}_3\text{CO}_2\text{H}/\text{CH}_2\text{Cl}_2$  (right).

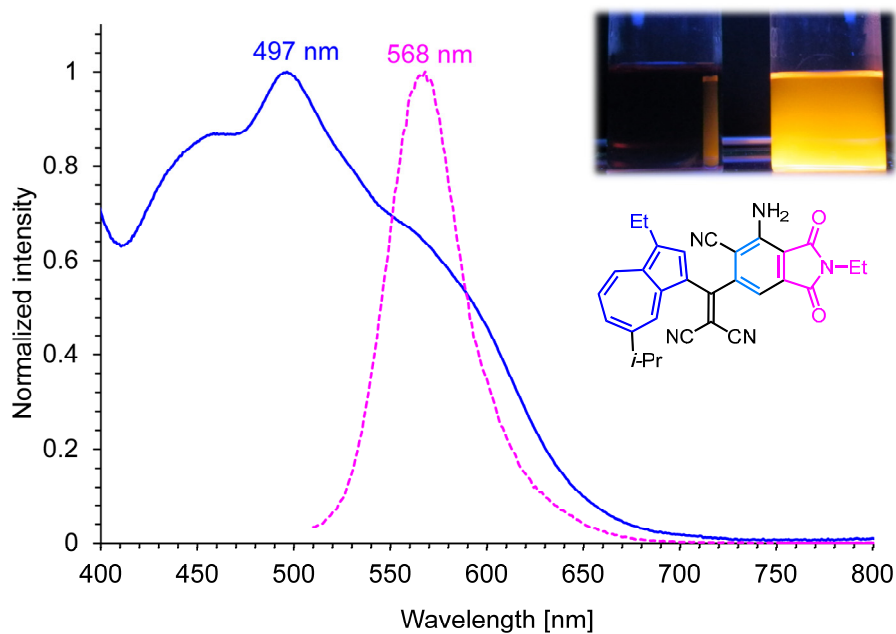

**Figure S84.** UV/Vis spectrum (blue line) and fluorescent spectrum (pink dotted-line) of **4g** in 30%  $\text{CF}_3\text{CO}_2\text{H}/\text{CH}_2\text{Cl}_2$ ; photo: in  $\text{CH}_2\text{Cl}_2$  (left) and in 30%  $\text{CF}_3\text{CO}_2\text{H}/\text{CH}_2\text{Cl}_2$  (right) under the UV-light irradiation at  $\lambda_{\text{ex}} = 365 \text{ nm}$ .



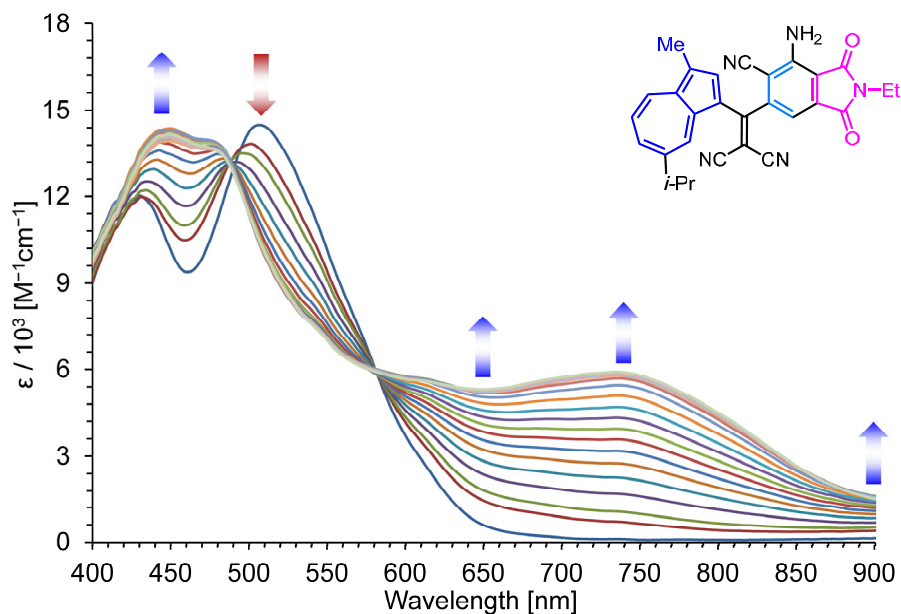

**Figure S85.** Continuous change in the visible spectrum of **4g**: constant-voltage electrochemical reduction at  $-2.00$  V in benzonitrile containing  $\text{Et}_4\text{NClO}_4$  (0.1 M) at 20 sec intervals.

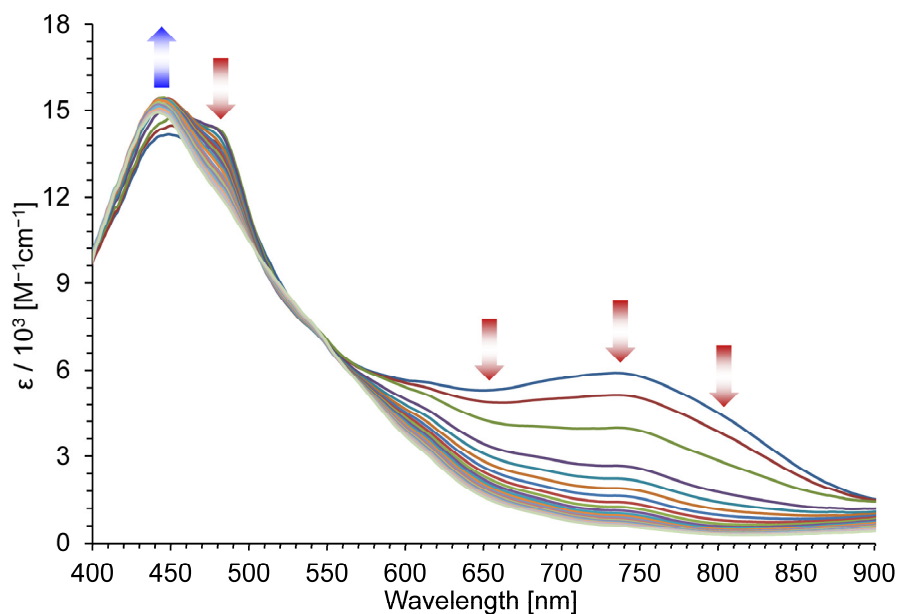

**Figure S86.** Continuous change in the visible spectrum of **4g**: constant-voltage electrochemical oxidation of the reduced species at  $\pm 0.00$  V in benzonitrile containing  $\text{Et}_4\text{NClO}_4$  (0.1 M) at 20 sec intervals.

3. Frontier Kohn–Sham orbitals of compounds 2a–2e and 4a–4g (Figures S87–S98).

HOMO (-6.25 eV)

LUMO (-3.37eV)

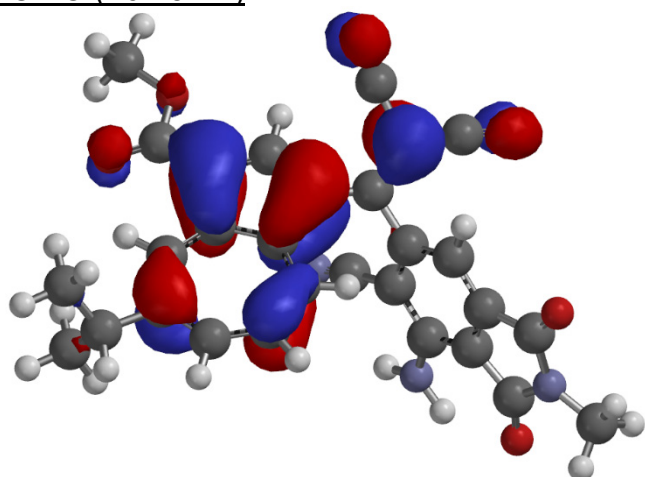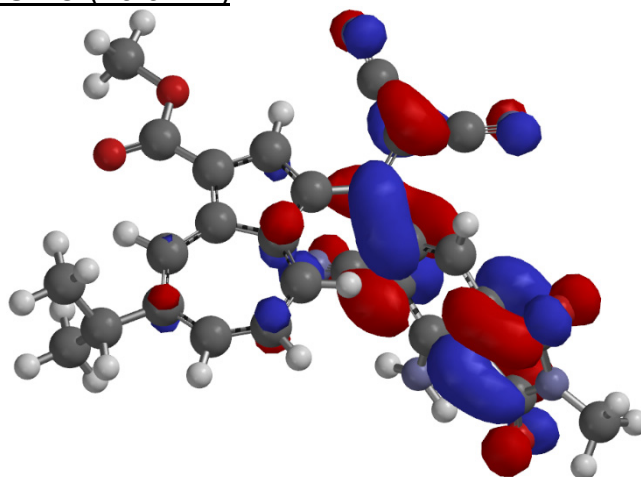

**Figure S87.** Frontier Kohn–Sham orbitals of TCBD **2a** at the B3LYP/6-311G\* level.

HOMO (-6.24 eV)

LUMO (-3.36 eV)

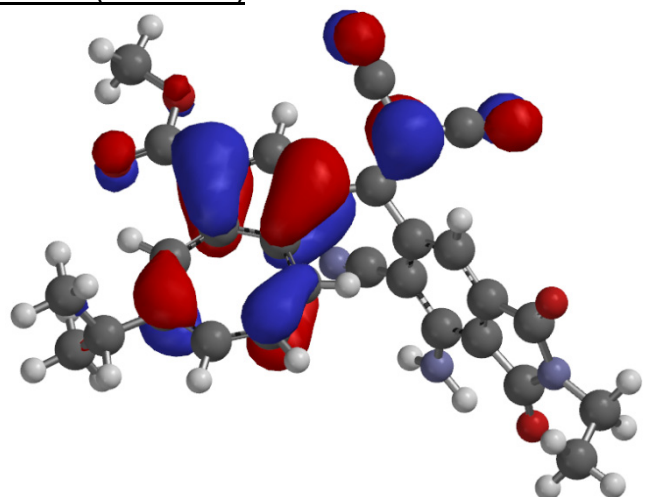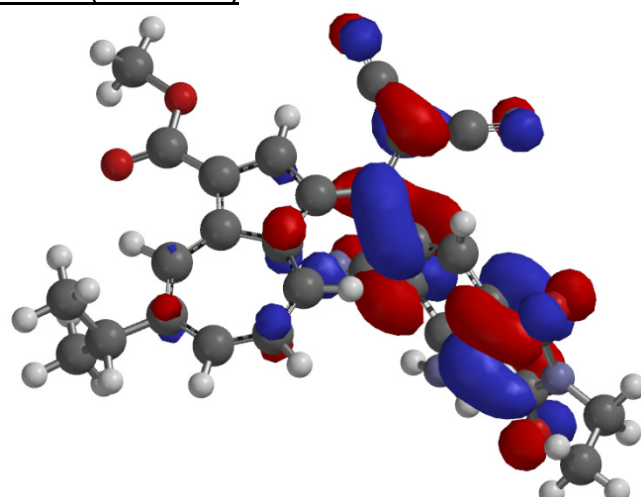

**Figure S88.** Frontier Kohn–Sham orbitals of TCBD **2b** at the B3LYP/6-311G\* level.

HOMO (-6.22 eV)

LUMO (-3.33 eV)

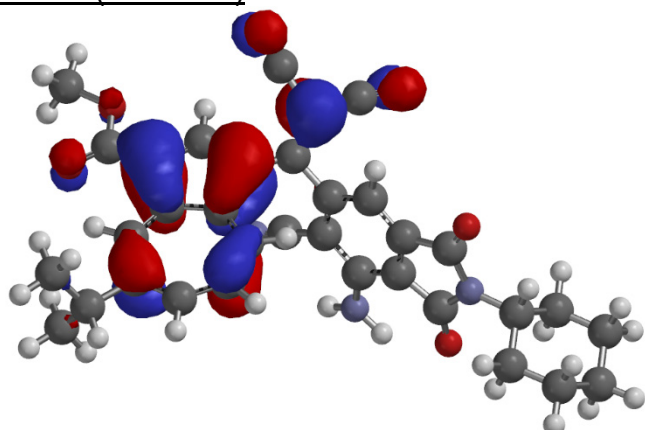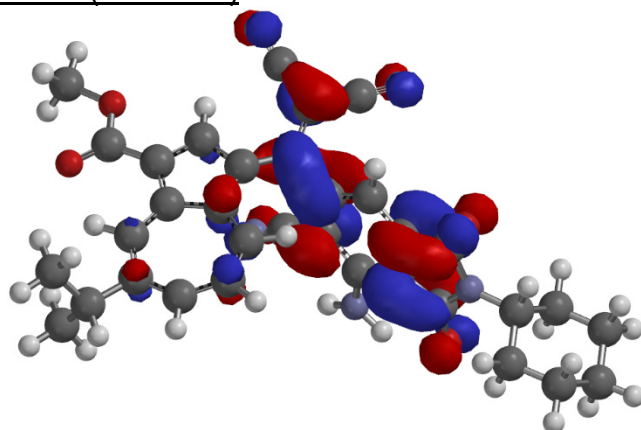

**Figure S89.** Frontier Kohn–Sham orbitals of TCBD **2c** at the B3LYP/6-311G\* level.

HOMO (-6.26 eV)

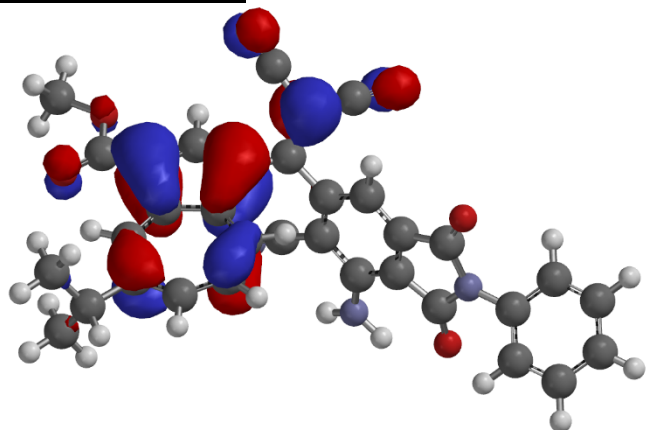

LUMO (-3.40 eV)

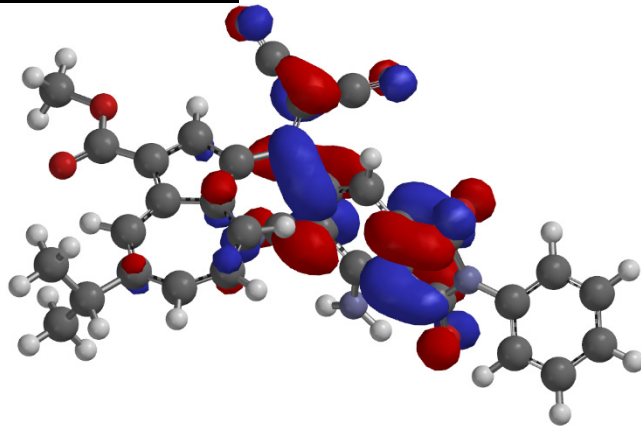

**Figure S90.** Frontier Kohn–Sham orbitals of TCBD **2d** at the B3LYP/6-311G\* level.

HOMO (-6.24 eV)

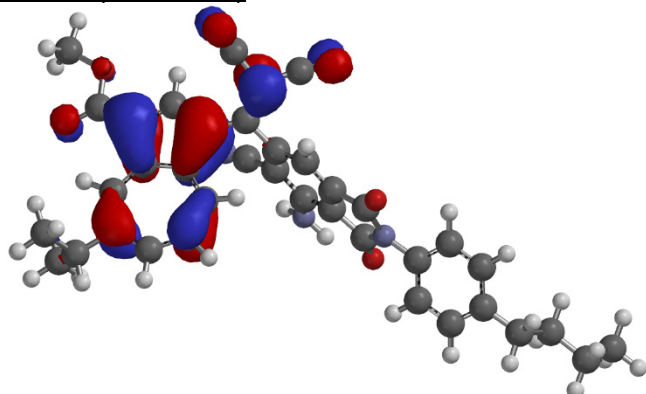

LUMO (-3.36 eV)

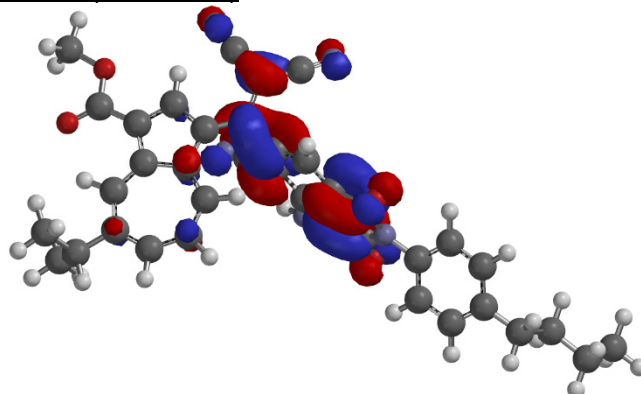

**Figure S91.** Frontier Kohn–Sham orbitals of TCBD **2e** at the B3LYP/6-311G\* level.

HOMO (-6.38 eV)

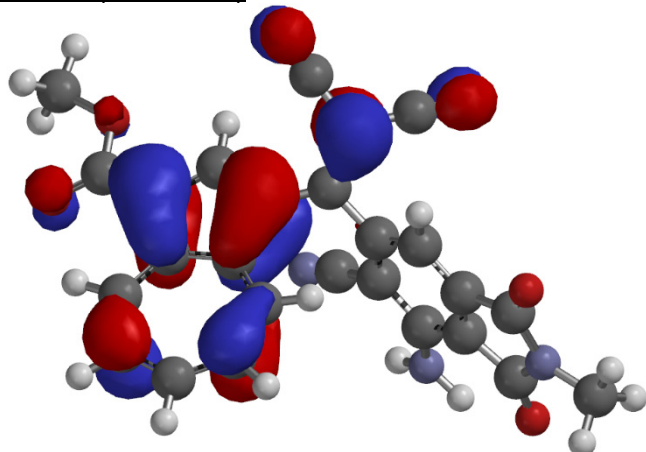

LUMO (-3.43 eV)

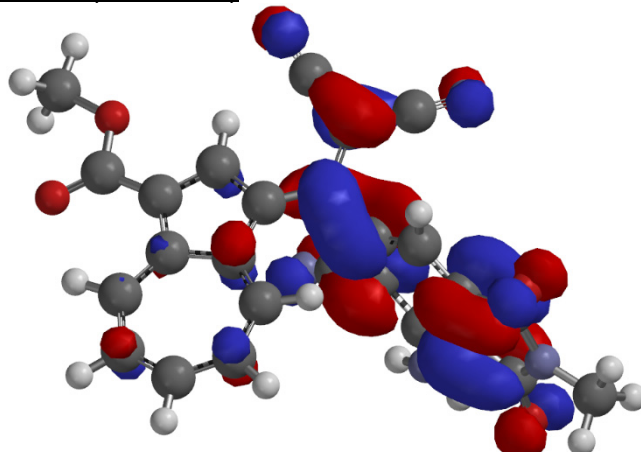

**Figure S92.** Frontier Kohn–Sham orbitals of TCBD **4a** at the B3LYP/6-311G\* level.

HOMO (-6.29 eV)

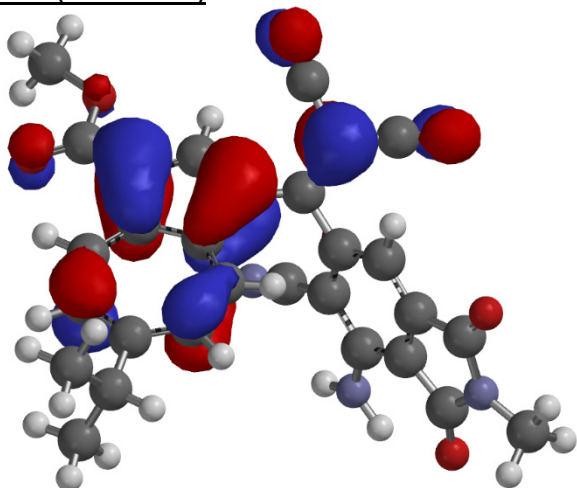

LUMO (-3.37 eV)

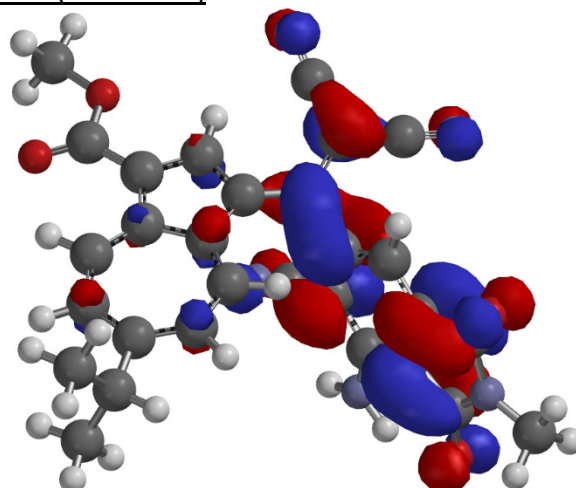

**Figure S93.** Frontier Kohn–Sham orbitals of TCBD **4b** at the B3LYP/6-311G\* level.

HOMO (-6.19 eV)

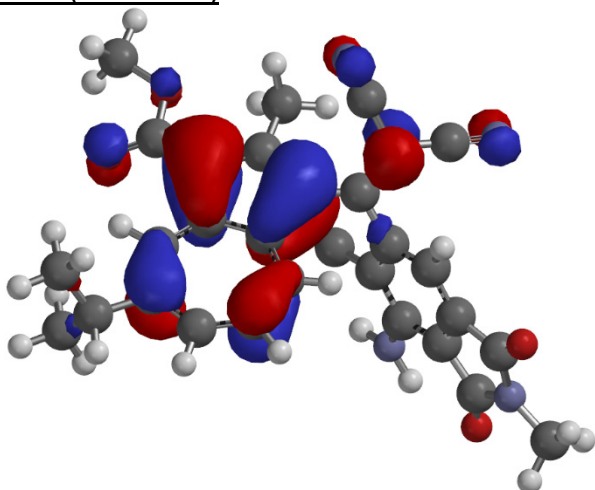

LUMO (-3.43 eV)

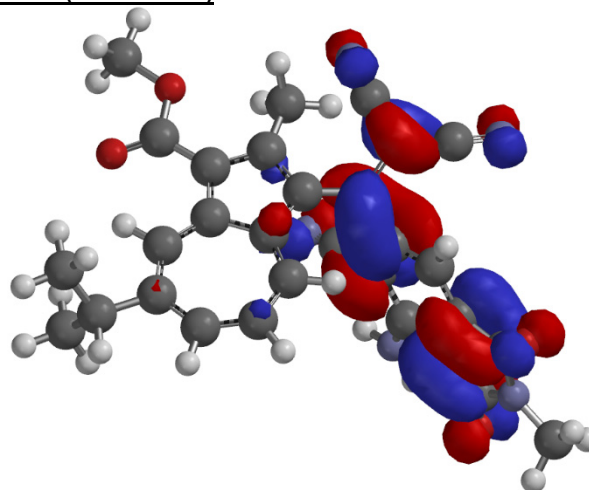

**Figure S94.** Frontier Kohn–Sham orbitals of TCBD **4c** at the B3LYP/6-311G\* level.

HOMO (-6.43 eV)

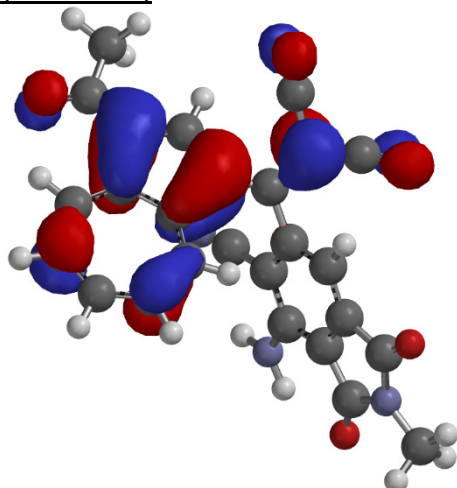

LUMO (-3.49 eV)

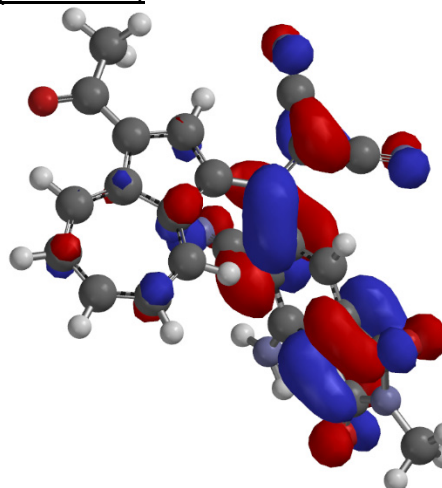

**Figure S95.** Frontier Kohn–Sham orbitals of TCBD **4d** at the B3LYP/6-311G\* level.

HOMO (-6.61 eV)

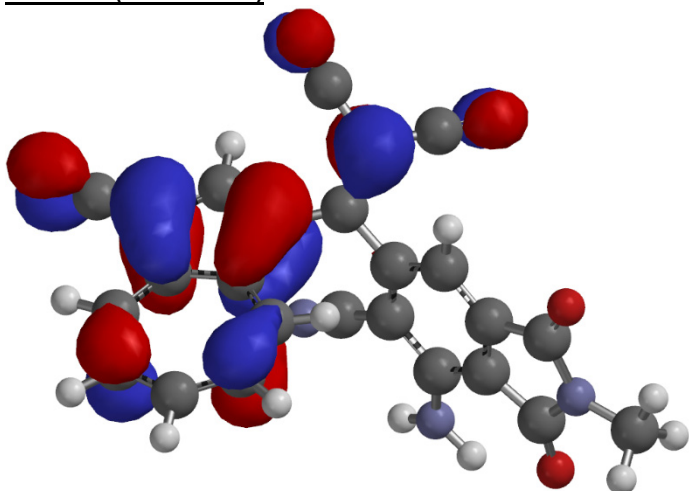

LUMO (-3.63 eV)

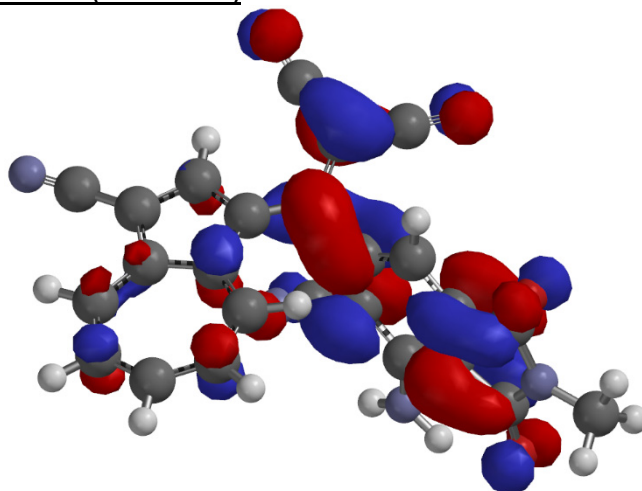

**Figure S96.** Frontier Kohn–Sham orbitals of TCBD **4e** at the B3LYP/6-311G\* level.

HOMO (-5.93 eV)

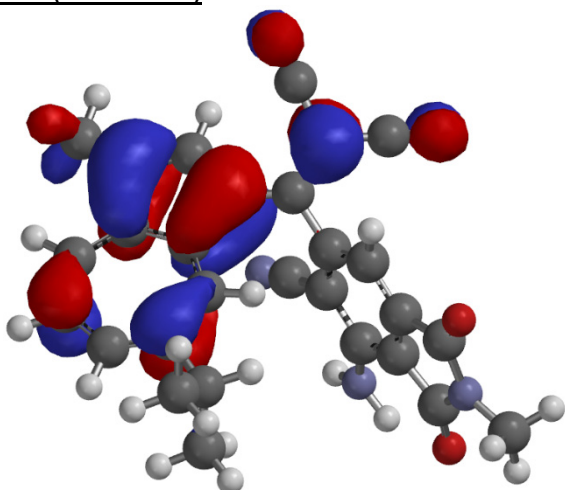

LUMO (-3.29 eV)

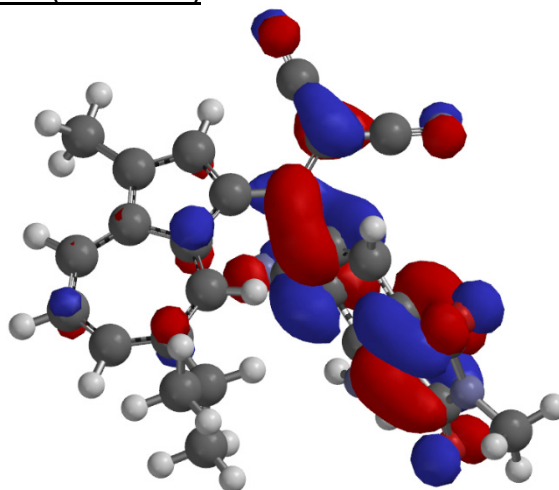

**Figure S97.** Frontier Kohn–Sham orbitals of TCBD **4f** at the B3LYP/6-311G\* level.

HOMO (-5.91 eV)

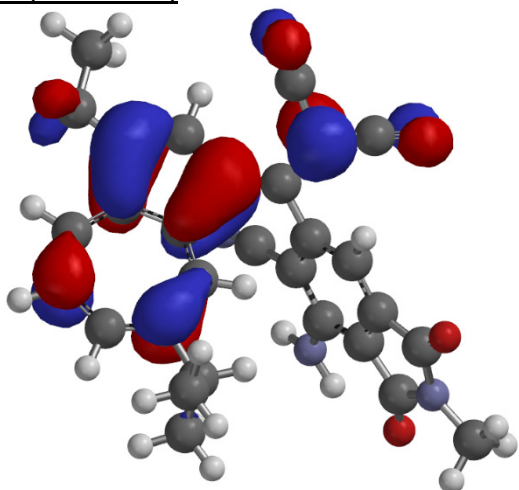

LUMO (-3.28 eV)

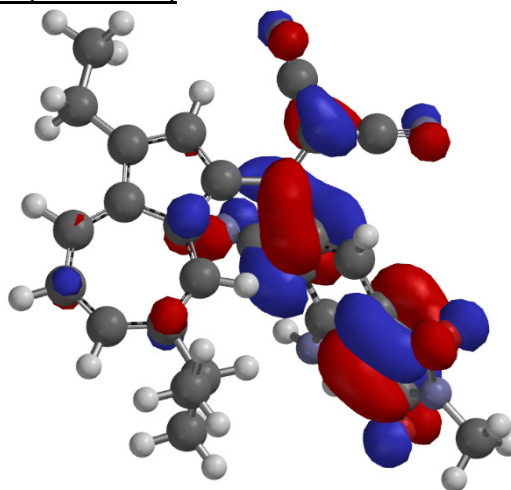

**Figure S98.** Frontier Kohn–Sham orbitals of TCBD **4g** at the B3LYP/6-311G\* level.

**Table S1.** Cartesian coordinates of **2a**; absolute energy is – 1692.74938 au.

|    | Atom   | X        | Y        | Z        |    | Atom   | X        | Y        | Z        |
|----|--------|----------|----------|----------|----|--------|----------|----------|----------|
| 1  | O O1   | 5.453963 | 0.622032 | 0.529487 | 31 | H H12C | 6.56834  | 3.022627 | 0.399094 |
| 2  | O O2   | 4.553036 | 2.667219 | 0.80248  | 32 | C C13  | -0.45414 | 1.710203 | -0.42974 |
| 3  | O O3   | -5.53535 | -1.94822 | 1.860487 | 33 | C C14  | -0.68465 | 3.014294 | -0.81664 |
| 4  | O O4   | -5.29138 | -0.26952 | -2.40811 | 34 | C C15  | 0.32275  | 3.856244 | -1.37734 |
| 5  | N N1   | 1.104346 | 4.565462 | -1.84902 | 35 | C C16  | -1.96391 | 3.635422 | -0.67666 |
| 6  | N N2   | -2.98215 | 4.17162  | -0.56583 | 36 | C C17  | -1.63976 | 0.895009 | -0.02166 |
| 7  | N N3   | 0.062843 | 0.71635  | 3.121675 | 37 | C C18  | -1.70777 | 0.356503 | 1.282307 |
| 8  | N N4   | -2.92772 | -0.93971 | 2.957065 | 38 | C C19  | -2.82972 | -0.41999 | 1.715467 |
| 9  | H H4NA | -3.76476 | -1.4438  | 3.20844  | 39 | C C20  | -3.83141 | -0.62034 | 0.756358 |
| 10 | H H4NB | -2.23677 | -0.74453 | 3.662803 | 40 | C C21  | -3.74855 | -0.09133 | -0.52147 |
| 11 | N N5   | -5.7453  | -1.24528 | -0.34692 | 41 | C C22  | -2.67691 | 0.673955 | -0.94152 |
| 12 | C C1   | 3.128431 | 0.971229 | 0.079649 | 42 | H H22  | -2.63339 | 1.083242 | -1.94272 |
| 13 | C C2   | 2.036566 | 1.83021  | 0.020828 | 43 | C C23  | -0.68935 | 0.588438 | 2.252237 |
| 14 | H H2   | 2.081178 | 2.876968 | 0.279112 | 44 | C C24  | -5.10496 | -1.35659 | 0.890068 |
| 15 | C C3   | 0.868862 | 1.12732  | -0.35605 | 45 | C C25  | -4.98626 | -0.50189 | -1.26551 |
| 16 | C C4   | 1.247231 | -0.23877 | -0.57144 | 46 | C C26  | -7.04476 | -1.82358 | -0.64336 |
| 17 | C C5   | 0.440393 | -1.26849 | -1.04879 | 47 | H H26A | -7.23977 | -1.67173 | -1.70332 |
| 18 | H H5   | -0.58792 | -1.00846 | -1.27379 | 48 | H H26B | -7.82563 | -1.3373  | -0.05568 |
| 19 | C C6   | 0.771043 | -2.59971 | -1.28676 | 49 | H H8   | -7.04468 | -2.88991 | -0.41426 |
| 20 | H H6   | -0.04286 | -3.21481 | -1.66084 | 50 | C C27  | 4.377934 | -3.79032 | -0.587   |
| 21 | C C7   | 1.983706 | -3.26754 | -1.11549 | 51 | H H3   | 3.992282 | -4.76071 | -0.91826 |
| 22 | H H7   | 1.954853 | -4.32569 | -1.36473 | 52 | C C28  | 5.545213 | -3.41615 | -1.51831 |
| 23 | C C8   | 3.224063 | -2.79053 | -0.6832  | 53 | H H1   | 6.317345 | -4.19011 | -1.48884 |
| 24 | C C9   | 3.507912 | -1.46166 | -0.33642 | 54 | H H10  | 6.01344  | -2.47469 | -1.22033 |
| 25 | H H9   | 4.533138 | -1.25245 | -0.05316 | 55 | H H11  | 5.213611 | -3.31284 | -2.55466 |
| 26 | C C10  | 2.689654 | -0.33828 | -0.28657 | 56 | C C29  | 4.857775 | -3.95681 | 0.866316 |
| 27 | C C11  | 4.48836  | 1.358513 | 0.481721 | 57 | H H4   | 5.631007 | -4.72788 | 0.926125 |
| 28 | C C12  | 5.84349  | 3.153168 | 1.203429 | 58 | H H12  | 4.038881 | -4.25139 | 1.527858 |
| 29 | H H12A | 6.193379 | 2.622267 | 2.089456 | 59 | H H13  | 5.285837 | -3.0299  | 1.257341 |
| 30 | H H12B | 5.698832 | 4.20865  | 1.420102 |    |        |          |          |          |

**Table S2.** Cartesian coordinates of **2b**; absolute energy is -1732.07420 au.

|    | Atom   | X        | Y        | Z        |    | Atom   | X        | Y        | Z        |
|----|--------|----------|----------|----------|----|--------|----------|----------|----------|
| 1  | O O1   | 5.711274 | 0.325755 | 0.449505 | 32 | C C13  | -0.12604 | 1.822162 | -0.38764 |
| 2  | O O2   | 4.978708 | 2.444906 | 0.653253 | 33 | C C14  | -0.27057 | 3.130722 | -0.80176 |
| 3  | O O3   | -5.43203 | -1.39099 | 2.053265 | 34 | C C15  | 0.781213 | 3.886538 | -1.40189 |
| 4  | O O4   | -5.1015  | 0.115383 | -2.27432 | 35 | C C16  | -1.50097 | 3.841895 | -0.65337 |
| 5  | N N1   | 1.601144 | 4.525641 | -1.90755 | 36 | C C17  | -1.3629  | 1.106422 | 0.055497 |
| 6  | N N2   | -2.47841 | 4.447795 | -0.5345  | 37 | C C18  | -1.45948 | 0.619826 | 1.377595 |
| 7  | N N3   | 0.348769 | 0.91912  | 3.191115 | 38 | C C19  | -2.62876 | -0.06328 | 1.84176  |
| 8  | N N4   | -2.75394 | -0.53102 | 3.10156  | 39 | C C20  | -3.6473  | -0.22903 | 0.893522 |
| 9  | H H4NA | -3.62559 | -0.95805 | 3.376933 | 40 | C C21  | -3.53669 | 0.250029 | -0.40179 |
| 10 | H H4NB | -2.04845 | -0.3544  | 3.797804 | 41 | C C22  | -2.41899 | 0.927354 | -0.8517  |
| 11 | N N5   | -5.60789 | -0.75797 | -0.18099 | 42 | H H22  | -2.35438 | 1.299989 | -1.86606 |
| 12 | C C1   | 3.406598 | 0.834679 | 0.048277 | 43 | C C23  | -0.41946 | 0.814184 | 2.332718 |
| 13 | C C2   | 2.379823 | 1.770479 | -0.00913 | 44 | C C24  | -4.96829 | -0.87045 | 1.057195 |
| 14 | H H2   | 2.512338 | 2.819269 | 0.207455 | 45 | C C25  | -4.80414 | -0.10111 | -1.12604 |
| 15 | C C3   | 1.151268 | 1.144663 | -0.3244  | 46 | C C26  | -6.94632 | -1.2726  | -0.46274 |
| 16 | C C4   | 1.421167 | -0.25384 | -0.49704 | 47 | H H26A | -7.37072 | -0.63344 | -1.23809 |
| 17 | C C5   | 0.52334  | -1.23827 | -0.89969 | 48 | H H26B | -7.53495 | -1.14708 | 0.447639 |
| 18 | H H5   | -0.49142 | -0.91154 | -1.0947  | 49 | C C27  | 4.281557 | -4.0276  | -0.49715 |
| 19 | C C6   | 0.744958 | -2.59892 | -1.09264 | 50 | H H3   | 3.793507 | -4.98547 | -0.70832 |
| 20 | H H6   | -0.12678 | -3.16617 | -1.40726 | 51 | C C28  | 5.368183 | -3.82221 | -1.56774 |
| 21 | C C7   | 1.911846 | -3.34753 | -0.93994 | 52 | H H1   | 6.085856 | -4.64727 | -1.54558 |
| 22 | H H7   | 1.794975 | -4.40953 | -1.14329 | 53 | H H10  | 5.927437 | -2.89667 | -1.40471 |
| 23 | C C8   | 3.200828 | -2.94815 | -0.57575 | 54 | H H11  | 4.937566 | -3.7799  | -2.57159 |
| 24 | C C9   | 3.593931 | -1.63232 | -0.29195 | 55 | C C29  | 4.894166 | -4.1273  | 0.910926 |
| 25 | H H9   | 4.641953 | -1.48803 | -0.05464 | 56 | H H4   | 5.602653 | -4.9589  | 0.957783 |
| 26 | C C10  | 2.860926 | -0.45049 | -0.25507 | 57 | H H12  | 4.126195 | -4.2979  | 1.669737 |
| 27 | C C11  | 4.803955 | 1.13257  | 0.394758 | 58 | H H13  | 5.43698  | -3.21872 | 1.18371  |
| 28 | C C12  | 6.314318 | 2.845481 | 0.996211 | 59 | C C30  | -6.93911 | -2.73471 | -0.90584 |
| 29 | H H12A | 6.648612 | 2.330777 | 1.897737 | 60 | H H8   | -6.36384 | -2.86358 | -1.82551 |
| 30 | H H12B | 6.258701 | 3.918047 | 1.164798 | 61 | H H14  | -7.96105 | -3.07192 | -1.09789 |
| 31 | H H12C | 7.002479 | 2.620412 | 0.180529 | 62 | H H15  | -6.5128  | -3.3767  | -0.13183 |

**Table S3.** Cartesian coordinates of **2c**; absolute energy is -1888.15669 au.

|    | Atom   | X        | Y        | Z        |    | Atom  | X        | Y        | Z        |
|----|--------|----------|----------|----------|----|-------|----------|----------|----------|
| 1  | O O1   | 6.640951 | -0.0168  | 0.486864 | 37 | C C18 | -0.48669 | 0.864827 | 1.255824 |
| 2  | O O2   | 6.060601 | 2.157722 | 0.545872 | 38 | C C19 | -1.71113 | 0.315012 | 1.752643 |
| 3  | O O3   | -4.61149 | -0.7198  | 2.045705 | 39 | C C20 | -2.74266 | 0.190594 | 0.81171  |
| 4  | O O4   | -4.1652  | 0.511082 | -2.36644 | 40 | C C21 | -2.58984 | 0.582363 | -0.50676 |
| 5  | N N1   | 2.907238 | 4.265369 | -2.26911 | 41 | C C22 | -1.41505 | 1.125551 | -0.99229 |
| 6  | N N2   | -1.17265 | 4.643514 | -0.96955 | 42 | H H22 | -1.31956 | 1.431851 | -2.0261  |
| 7  | N N3   | 1.333672 | 1.117517 | 3.064074 | 43 | C C23 | 0.563363 | 1.026766 | 2.20593  |
| 8  | N N4   | -1.87691 | -0.06833 | 3.036134 | 44 | C C24 | -4.12112 | -0.30561 | 1.011147 |
| 9  | H H4NA | -2.78362 | -0.4008  | 3.328669 | 45 | C C25 | -3.88989 | 0.323101 | -1.20769 |
| 10 | H H4NB | -1.15902 | 0.084882 | 3.725169 | 46 | C C27 | 4.908843 | -4.30763 | -0.20918 |
| 11 | N N5   | -4.75745 | -0.20008 | -0.2299  | 47 | H H3  | 4.366301 | -5.23655 | -0.41753 |
| 12 | C C1   | 4.384944 | 0.629193 | 0.012396 | 48 | C C28 | 6.072495 | -4.22073 | -1.21207 |
| 13 | C C2   | 3.431263 | 1.631446 | -0.12716 | 49 | H H1  | 6.722779 | -5.09348 | -1.10845 |
| 14 | H H2   | 3.635458 | 2.679654 | 0.028143 | 50 | H H10 | 6.686993 | -3.33198 | -1.04491 |
| 15 | C C3   | 2.166483 | 1.07781  | -0.43235 | 51 | H H11 | 5.711527 | -4.18963 | -2.24326 |
| 16 | C C4   | 2.334862 | -0.34423 | -0.51266 | 52 | C C29 | 5.426539 | -4.39461 | 1.237772 |
| 17 | C C5   | 1.375067 | -1.28385 | -0.87887 | 53 | H H4  | 6.091904 | -5.25523 | 1.349595 |
| 18 | H H5   | 0.391609 | -0.89773 | -1.12139 | 54 | H H12 | 4.606266 | -4.50847 | 1.951138 |
| 19 | C C6   | 1.50134  | -2.66623 | -0.98604 | 55 | H H13 | 5.993023 | -3.50323 | 1.519416 |
| 20 | H H6   | 0.597218 | -3.18727 | -1.28897 | 56 | C C26 | -6.16148 | -0.53852 | -0.51802 |
| 21 | C C7   | 2.606885 | -3.48595 | -0.76004 | 57 | C C30 | -7.90554 | -2.35987 | -0.67013 |
| 22 | H H7   | 2.418365 | -4.547   | -0.90597 | 58 | C C31 | -8.58666 | 0.004507 | -0.06305 |
| 23 | C C8   | 3.912954 | -3.1595  | -0.38526 | 59 | C C32 | -8.88172 | -1.48791 | 0.130301 |
| 24 | C C9   | 4.395608 | -1.86086 | -0.16787 | 60 | C C33 | -7.13085 | 0.343551 | 0.285873 |
| 25 | H H9   | 5.446159 | -1.77816 | 0.087989 | 61 | C C34 | -6.4454  | -2.03584 | -0.32234 |
| 26 | C C10  | 3.751451 | -0.62935 | -0.22351 | 62 | H H8  | -8.0706  | -2.20146 | -1.74394 |
| 27 | C C11  | 5.794862 | 0.847267 | 0.366079 | 63 | H H14 | -8.78586 | 0.284252 | -1.10551 |
| 28 | C C12  | 7.416763 | 2.482925 | 0.887291 | 64 | H H15 | -8.79926 | -1.73861 | 1.195578 |
| 29 | H H12A | 7.696796 | 2.012731 | 1.830648 | 65 | H H16 | -6.95872 | 0.189428 | 1.355235 |
| 30 | H H12B | 7.439158 | 3.566167 | 0.976941 | 66 | H H17 | -6.24416 | -2.3107  | 0.717524 |
| 31 | H H12C | 8.099202 | 2.148277 | 0.105182 | 67 | H H18 | -6.27354 | -0.29847 | -1.57953 |
| 32 | C C13  | 0.945734 | 1.843994 | -0.57008 | 68 | H H19 | -8.10055 | -3.42062 | -0.48282 |
| 33 | C C14  | 0.914007 | 3.122594 | -1.08835 | 69 | H H20 | -9.26171 | 0.609377 | 0.551117 |
| 34 | C C15  | 2.031887 | 3.737899 | -1.72872 | 70 | H H21 | -9.91317 | -1.71063 | -0.16123 |
| 35 | C C16  | -0.25229 | 3.945409 | -1.01841 | 71 | H H23 | -6.922   | 1.397387 | 0.073103 |
| 36 | C C17  | -0.34719 | 1.264339 | -0.09242 | 72 | H H24 | -5.76401 | -2.62088 | -0.94853 |



**Table S4.** Cartesian coordinates of **2d**; absolute energy is -1884.52144 au.

|    | Atom   | X        | Y        | Z        |    | Atom  | X        | Y        | Z        |
|----|--------|----------|----------|----------|----|-------|----------|----------|----------|
| 1  | O O1   | 6.476809 | 0.012091 | 0.346186 | 34 | C C15 | 1.782003 | 3.793501 | -1.65058 |
| 2  | O O2   | 5.897445 | 2.185382 | 0.447539 | 35 | C C16 | -0.48248 | 3.970815 | -0.8678  |
| 3  | O O3   | -4.67657 | -0.79858 | 2.286043 | 36 | C C17 | -0.52814 | 1.285207 | 0.030703 |
| 4  | O O4   | -4.36111 | 0.436658 | -2.14934 | 37 | C C18 | -0.62341 | 0.892308 | 1.383873 |
| 5  | N N1   | 2.63775  | 4.334094 | -2.20898 | 38 | C C19 | -1.82438 | 0.326542 | 1.91897  |
| 6  | N N2   | -1.41061 | 4.654579 | -0.78006 | 39 | C C20 | -2.87759 | 0.173267 | 1.005548 |
| 7  | N N3   | 1.247719 | 1.177881 | 3.134673 | 40 | C C21 | -2.7685  | 0.562633 | -0.31767 |
| 8  | N N4   | -1.94719 | -0.04737 | 3.209167 | 41 | C C22 | -1.61882 | 1.126672 | -0.83783 |
| 9  | H H4NA | -2.83579 | -0.4006  | 3.53113  | 42 | H H22 | -1.55767 | 1.42832  | -1.87561 |
| 10 | H H4NB | -1.2074  | 0.11255  | 3.873145 | 43 | C C23 | 0.452533 | 1.073166 | 2.301168 |
| 11 | N N5   | -4.90344 | -0.29473 | 0.006879 | 44 | C C24 | -4.227   | -0.36952 | 1.244011 |
| 12 | C C1   | 4.205086 | 0.660693 | -0.04225 | 45 | C C25 | -4.06823 | 0.259688 | -0.99599 |
| 13 | C C2   | 3.245791 | 1.663    | -0.13542 | 46 | C C27 | 4.728556 | -4.27235 | -0.34586 |
| 14 | H H2   | 3.454407 | 2.70974  | 0.023744 | 47 | H H3  | 4.180935 | -5.19933 | -0.54936 |
| 15 | C C3   | 1.971232 | 1.110699 | -0.40025 | 48 | C C28 | 5.857182 | -4.16771 | -1.38677 |
| 16 | C C4   | 2.138701 | -0.31049 | -0.50349 | 49 | H H1  | 6.509435 | -5.0429  | -1.32348 |
| 17 | C C5   | 1.168362 | -1.24788 | -0.84692 | 50 | H H10 | 6.478318 | -3.28287 | -1.22357 |
| 18 | H H5   | 0.175587 | -0.86211 | -1.04771 | 51 | H H11 | 5.460581 | -4.11632 | -2.40399 |
| 19 | C C6   | 1.29338  | -2.62819 | -0.97884 | 52 | C C29 | 5.294978 | -4.37869 | 1.081379 |
| 20 | H H6   | 0.379938 | -3.14694 | -1.25669 | 53 | H H4  | 5.963128 | -5.24079 | 1.160046 |
| 21 | C C7   | 2.407889 | -3.44819 | -0.80486 | 54 | H H12 | 4.499081 | -4.50174 | 1.82047  |
| 22 | H H7   | 2.216605 | -4.50742 | -0.95998 | 55 | H H13 | 5.870898 | -3.49085 | 1.355211 |
| 23 | C C8   | 3.725769 | -3.12391 | -0.4713  | 56 | C C26 | -6.24916 | -0.72456 | -0.21142 |
| 24 | C C9   | 4.213143 | -1.82719 | -0.25343 | 57 | C C30 | -8.86844 | -1.5659  | -0.65093 |
| 25 | H H9   | 5.271968 | -1.74565 | -0.03372 | 58 | C C31 | -7.12122 | 0.076668 | -0.95065 |
| 26 | C C10  | 3.565355 | -0.5962  | -0.26994 | 59 | C C32 | -6.68429 | -1.94432 | 0.310618 |
| 27 | C C11  | 5.626642 | 0.876694 | 0.263797 | 60 | C C33 | -7.99548 | -2.35636 | 0.092997 |
| 28 | C C12  | 7.264409 | 2.508683 | 0.745508 | 61 | C C34 | -8.4263  | -0.35218 | -1.17217 |
| 29 | H H12A | 7.577971 | 2.027277 | 1.672566 | 62 | H H8  | -6.77867 | 1.01866  | -1.35828 |
| 30 | H H12B | 7.288524 | 3.590776 | 0.847856 | 63 | H H14 | -6.0082  | -2.5572  | 0.892688 |
| 31 | H H12C | 7.919504 | 2.184984 | -0.06415 | 64 | H H15 | -8.33173 | -3.30224 | 0.504518 |
| 32 | C C13  | 0.745325 | 1.875828 | -0.4858  | 65 | H H16 | -9.09965 | 0.270537 | -1.75154 |
| 33 | C C14  | 0.68892  | 3.160862 | -0.98505 | 66 | H H17 | -9.88828 | -1.89358 | -0.82294 |

**Table S5.** Cartesian coordinates of **2e**; absolute energy is -2041.81134 au.

|    | Atom   | X        | Y        | Z        |    | Atom  | X        | Y        | Z        |
|----|--------|----------|----------|----------|----|-------|----------|----------|----------|
| 1  | O O1   | 7.641176 | -0.40941 | 0.357444 | 40 | C C21 | -1.52196 | 0.870048 | -0.27591 |
| 2  | O O2   | 7.226832 | 1.798925 | 0.504449 | 41 | C C22 | -0.3395  | 1.337457 | -0.81942 |
| 3  | O O3   | -3.48915 | -0.2915  | 2.379319 | 42 | H H22 | -0.26765 | 1.612813 | -1.86381 |
| 4  | O O4   | -3.14013 | 0.805147 | -2.08948 | 43 | C C23 | 1.760703 | 1.186442 | 2.297804 |
| 5  | N N1   | 4.169404 | 4.179225 | -2.25547 | 44 | C C24 | -3.02372 | 0.078066 | 1.321146 |
| 6  | N N2   | 0.159642 | 4.85137  | -0.84882 | 45 | C C25 | -2.84753 | 0.637685 | -0.93445 |
| 7  | N N3   | 2.571594 | 1.245072 | 3.120623 | 46 | C C27 | 5.574726 | -4.52998 | -0.4512  |
| 8  | N N4   | -0.7084  | 0.279228 | 3.255854 | 47 | H H3  | 4.96607  | -5.40757 | -0.69584 |
| 9  | H H4NA | -1.61606 | -0.00627 | 3.591411 | 48 | C C28 | 6.724615 | -4.46838 | -1.47238 |
| 10 | H H4NB | 0.050429 | 0.389822 | 3.908202 | 49 | H H1  | 7.313217 | -5.38881 | -1.43141 |
| 11 | N N5   | -3.70633 | 0.164316 | 0.088913 | 50 | H H10 | 7.402936 | -3.63545 | -1.26957 |
| 12 | C C1   | 5.430173 | 0.419389 | -0.03827 | 51 | H H11 | 6.348813 | -4.35378 | -2.49235 |
| 13 | C C2   | 4.554045 | 1.495889 | -0.13059 | 52 | C C29 | 6.110948 | -4.72829 | 0.978198 |
| 14 | H H2   | 4.841799 | 2.521779 | 0.040496 | 53 | H H4  | 6.720004 | -5.63497 | 1.031406 |
| 15 | C C3   | 3.242877 | 1.04842  | -0.41076 | 54 | H H12 | 5.297118 | -4.82698 | 1.70136  |
| 16 | C C4   | 3.296964 | -0.37965 | -0.52513 | 55 | H H13 | 6.739142 | -3.89111 | 1.294163 |
| 17 | C C5   | 2.254973 | -1.23262 | -0.87907 | 56 | C C26 | -5.07848 | -0.18854 | -0.10067 |
| 18 | H H5   | 1.295715 | -0.76583 | -1.07192 | 57 | C C30 | -7.77904 | -0.88458 | -0.46228 |
| 19 | C C6   | 2.270912 | -2.61626 | -1.03208 | 58 | C C31 | -5.9121  | 0.622241 | -0.87165 |
| 20 | H H6   | 1.319061 | -3.05752 | -1.31491 | 59 | C C32 | -5.58692 | -1.34905 | 0.484359 |
| 21 | C C7   | 3.319346 | -3.52328 | -0.87886 | 60 | C C33 | -6.92484 | -1.68105 | 0.306615 |
| 22 | H H7   | 3.046929 | -4.56112 | -1.05569 | 61 | C C34 | -7.2444  | 0.265808 | -1.05135 |
| 23 | C C8   | 4.658997 | -3.30781 | -0.54407 | 62 | H H8  | -5.5195  | 1.514793 | -1.34139 |
| 24 | C C9   | 5.244263 | -2.05791 | -0.29493 | 63 | H H14 | -4.94544 | -1.9815  | 1.084355 |
| 25 | H H9   | 6.305001 | -2.06583 | -0.07134 | 64 | H H15 | -7.30897 | -2.58433 | 0.771799 |
| 26 | C C10  | 4.695642 | -0.78005 | -0.28798 | 65 | H H16 | -7.88006 | 0.900652 | -1.66184 |
| 27 | C C11  | 6.860177 | 0.519009 | 0.286462 | 66 | C C35 | -9.24186 | -1.23459 | -0.61012 |
| 28 | C C12  | 8.609685 | 2.011209 | 0.82745  | 67 | H H17 | -9.36299 | -2.3237  | -0.57875 |
| 29 | H H12A | 8.871759 | 1.488065 | 1.747845 | 68 | H H18 | -9.59436 | -0.91413 | -1.59537 |
| 30 | H H12B | 8.713753 | 3.085965 | 0.954281 | 69 | C C36 | -10.1155 | -0.60237 | 0.491712 |
| 31 | H H12C | 9.250761 | 1.656077 | 0.0199   | 70 | H H19 | -9.69572 | -0.87424 | 1.466673 |
| 32 | C C13  | 2.081618 | 1.909514 | -0.50187 | 71 | H H21 | -10.041  | 0.49001  | 0.42604  |
| 33 | C C14  | 2.129517 | 3.186501 | -1.01949 | 72 | C C37 | -11.5924 | -1.02102 | 0.4476   |
| 34 | C C15  | 3.271931 | 3.717087 | -1.69218 | 73 | H H20 | -11.6615 | -2.11364 | 0.524834 |
| 35 | C C16  | 1.027947 | 4.091298 | -0.91851 | 74 | H H24 | -12.0884 | -0.62637 | 1.341819 |
| 36 | C C17  | 0.770167 | 1.430395 | 0.034452 | 75 | C C38 | -12.3524 | -0.54558 | -0.79425 |
| 37 | C C18  | 0.662624 | 1.072444 | 1.39634  | 76 | H H23 | -11.9637 | -0.99324 | -1.71289 |
| 38 | C C19  | -0.57155 | 0.613449 | 1.956479 | 77 | H H25 | -12.2881 | 0.541934 | -0.90465 |

39 C C20 -1.6432 0.519641 1.056958 78 H H26 -13.4124 -0.80652 -0.73202

**Table S6.** Cartesian coordinates of **4a**; absolute energy is -1574.78186 au.

|    | Atom   | X        | Y        | Z        |    | Atom   | X        | Y        | Z        |
|----|--------|----------|----------|----------|----|--------|----------|----------|----------|
| 1  | O O1   | 5.882361 | -1.13115 | 0.280474 | 26 | C C10  | 2.962926 | -1.37105 | -0.50531 |
| 2  | O O2   | 5.472705 | 1.032957 | 0.75047  | 27 | C C11  | 5.108801 | -0.19739 | 0.334323 |
| 3  | O O3   | -5.39735 | -1.32711 | 1.784235 | 28 | C C12  | 6.849118 | 1.186149 | 1.130449 |
| 4  | O O4   | -4.82227 | 0.65211  | -2.32163 | 29 | H H12A | 7.086651 | 0.539228 | 1.975944 |
| 5  | N N1   | 2.48704  | 3.872106 | -1.55221 | 30 | H H12B | 6.956723 | 2.232232 | 1.406202 |
| 6  | N N2   | -1.56082 | 4.288073 | -0.15163 | 31 | H H12C | 7.505958 | 0.939153 | 0.295768 |
| 7  | N N3   | 0.665079 | -0.06935 | 3.115354 | 32 | C C13  | 0.347388 | 1.323358 | -0.32123 |
| 8  | N N4   | -2.6238  | -1.01565 | 2.893613 | 33 | C C14  | 0.412418 | 2.675295 | -0.58437 |
| 9  | H H4NA | -3.55075 | -1.34026 | 3.124674 | 34 | C C15  | 1.574453 | 3.318047 | -1.10926 |
| 10 | H H4NB | -1.90143 | -1.04475 | 3.594277 | 35 | C C16  | -0.69126 | 3.551232 | -0.34485 |
| 11 | N N5   | -5.46337 | -0.39825 | -0.34799 | 36 | C C17  | -0.98618 | 0.759921 | 0.053673 |
| 12 | C C1   | 3.685141 | -0.23749 | -0.03608 | 37 | C C18  | -1.16138 | 0.131777 | 1.30661  |
| 13 | C C2   | 2.808225 | 0.842295 | 0.03731  | 38 | C C19  | -2.42304 | -0.41776 | 1.700746 |
| 14 | H H2   | 3.091603 | 1.82173  | 0.390954 | 39 | C C20  | -3.45175 | -0.30678 | 0.755404 |
| 15 | C C3   | 1.507765 | 0.45483  | -0.35202 | 40 | C C21  | -3.26508 | 0.310123 | -0.47062 |
| 16 | C C4   | 1.568385 | -0.9329  | -0.71323 | 41 | C C22  | -2.05524 | 0.859637 | -0.85098 |
| 17 | C C5   | 0.53137  | -1.69831 | -1.24141 | 42 | H H22  | -1.93325 | 1.341386 | -1.81284 |
| 18 | H H5   | -0.41372 | -1.18527 | -1.37828 | 43 | C C23  | -0.10769 | 0.04657  | 2.26251  |
| 19 | C C6   | 0.523244 | -3.03804 | -1.62759 | 44 | C C24  | -4.8546  | -0.75885 | 0.857366 |
| 20 | H H6   | -0.42641 | -3.40415 | -2.0071  | 45 | C C25  | -4.56728 | 0.24826  | -1.21507 |
| 21 | C C7   | 1.558724 | -3.96957 | -1.59482 | 46 | C C26  | -6.85604 | -0.66341 | -0.66716 |
| 22 | H H7   | 1.302377 | -4.96705 | -1.9423  | 47 | H H26A | -7.08373 | -0.1528  | -1.60108 |
| 23 | C C8   | 2.878799 | -3.79337 | -1.18634 | 48 | H H26B | -7.50081 | -0.28833 | 0.128226 |
| 24 | C C9   | 3.502356 | -2.6396  | -0.71511 | 49 | H H1   | 3.514931 | -4.67107 | -1.2553  |
| 25 | H H9   | 4.556025 | -2.72432 | -0.47339 | 50 | H H8   | -7.02896 | -1.73497 | -0.78651 |

**Table S7.** Cartesian coordinates of **4b**; absolute energy is  $-1692.74953$  au.

|    | Atom | X    | Y        | Z        |          | Atom | X | Y    | Z        |          |          |
|----|------|------|----------|----------|----------|------|---|------|----------|----------|----------|
| 1  | O    | O1   | 5.74323  | 0.303627 | 0.651945 | 31   | C | C13  | -0.02622 | 1.816015 | -0.55181 |
| 2  | O    | O2   | 5.051894 | 2.447197 | 0.635968 | 32   | C | C14  | -0.12728 | 3.068449 | -1.12071 |
| 3  | O    | O3   | -5.4618  | -1.04156 | 2.047434 | 33   | C | C15  | 0.963837 | 3.7299   | -1.76127 |
| 4  | O    | O4   | -4.9657  | -0.02232 | -2.40433 | 34   | C | C16  | -1.347   | 3.812966 | -1.1084  |
| 5  | N    | N1   | 1.816697 | 4.291012 | -2.30348 | 35   | C | C17  | -1.29105 | 1.175749 | -0.07347 |
| 6  | N    | N2   | -2.31474 | 4.445485 | -1.10704 | 36   | C | C18  | -1.44044 | 0.845771 | 1.291374 |
| 7  | N    | N3   | 0.302738 | 1.344472 | 3.12453  | 37   | C | C19  | -2.63443 | 0.232736 | 1.788866 |
| 8  | N    | N4   | -2.80925 | -0.08559 | 3.088685 | 38   | C | C20  | -3.62253 | -0.03    | 0.83055  |
| 9  | H    | H4NA | -3.69439 | -0.47232 | 3.380094 | 39   | C | C21  | -3.46224 | 0.29928  | -0.50572 |
| 10 | H    | H4NB | -2.1252  | 0.161884 | 3.784808 | 40   | C | C22  | -2.32003 | 0.907849 | -0.99046 |
| 11 | N    | N5   | -5.55155 | -0.65754 | -0.24511 | 41   | H | H22  | -2.21724 | 1.161625 | -2.03788 |
| 12 | C    | C1   | 3.466871 | 0.816258 | 0.12508  | 42   | C | C23  | -0.43289 | 1.142202 | 2.255097 |
| 13 | C    | C2   | 2.458775 | 1.761928 | -0.06031 | 43   | C | C24  | -4.95631 | -0.63652 | 1.01918  |
| 14 | H    | H2   | 2.602831 | 2.824221 | 0.064076 | 44   | C | C25  | -4.70981 | -0.11493 | -1.23015 |
| 15 | C    | C3   | 1.235185 | 1.128883 | -0.36522 | 45   | C | C26  | -6.88364 | -1.17501 | -0.50678 |
| 16 | C    | C4   | 1.48825  | -0.28613 | -0.39654 | 46   | H | H26A | -7.08847 | -1.03557 | -1.56658 |
| 17 | C    | C5   | 0.589148 | -1.28859 | -0.74538 | 47   | H | H26B | -7.62397 | -0.63561 | 0.085723 |
| 18 | H    | H5   | -0.40893 | -0.95588 | -1.00696 | 48   | H | H1   | 3.913533 | -3.74575 | -0.04066 |
| 19 | C    | C6   | 0.764304 | -2.66991 | -0.82177 | 49   | H | H8   | -6.93868 | -2.23616 | -0.25789 |
| 20 | H    | H6   | -0.12693 | -3.21465 | -1.12195 | 50   | C | C27  | 1.72576  | -4.9746  | -0.73591 |
| 21 | C    | C7   | 1.890197 | -3.46316 | -0.57337 | 51   | H | H4   | 0.695303 | -5.15019 | -1.06123 |
| 22 | C    | C8   | 3.152407 | -2.9856  | -0.19124 | 52   | C | C28  | 1.912448 | -5.71584 | 0.600547 |
| 23 | C    | C9   | 3.6021   | -1.68558 | 0.011106 | 53   | H | H7   | 2.934932 | -5.62596 | 0.976595 |
| 24 | H    | H9   | 4.64761  | -1.57929 | 0.279331 | 54   | H | H10  | 1.702334 | -6.78122 | 0.472723 |
| 25 | C    | C10  | 2.909571 | -0.47676 | -0.08087 | 55   | H | H11  | 1.239008 | -5.32959 | 1.369709 |
| 26 | C    | C11  | 4.858202 | 1.119447 | 0.492585 | 56   | C | C29  | 2.650239 | -5.54299 | -1.82685 |
| 27 | C    | C12  | 6.383464 | 2.85216  | 0.98867  | 57   | H | H3   | 3.705143 | -5.45245 | -1.55496 |
| 28 | H    | H12A | 6.670394 | 2.426597 | 1.951079 | 58   | H | H12  | 2.506834 | -5.02954 | -2.78078 |
| 29 | H    | H12B | 6.349306 | 3.937411 | 1.044224 | 59   | H | H13  | 2.442182 | -6.60513 | -1.98199 |
| 30 | H    | H12C | 7.095904 | 2.528812 | 0.228792 |      |   |      |          |          |          |

**Table S8.** Cartesian coordinates of **4c**; absolute energy is -1732.07212 au.

|    | Atom | X    | Y        | Z        |          | Atom | X | Y    | Z        |          |          |
|----|------|------|----------|----------|----------|------|---|------|----------|----------|----------|
| 1  | O    | O1   | 5.252624 | 0.430733 | 0.909356 | 32   | C | C14  | -0.71668 | 2.639027 | -1.5427  |
| 2  | O    | O2   | 4.52283  | 2.550592 | 0.903409 | 33   | C | C15  | 0.343189 | 3.230134 | -2.29646 |
| 3  | O    | O3   | -5.5674  | -1.645   | 2.234874 | 34   | C | C16  | -1.98459 | 3.286226 | -1.67986 |
| 4  | O    | O4   | -5.31379 | -0.89434 | -2.29019 | 35   | C | C17  | -1.71399 | 0.833039 | -0.18366 |
| 5  | N    | N1   | 1.175688 | 3.716653 | -2.93326 | 36   | C | C18  | -1.78765 | 0.580828 | 1.205562 |
| 6  | N    | N2   | -2.98942 | 3.843347 | -1.80479 | 37   | C | C19  | -2.90027 | -0.10628 | 1.78783  |
| 7  | N    | N3   | -0.06398 | 1.364669 | 2.954602 | 38   | C | C20  | -3.88851 | -0.52657 | 0.887616 |
| 8  | N    | N4   | -3.00426 | -0.34745 | 3.111197 | 39   | C | C21  | -3.80392 | -0.27537 | -0.472   |
| 9  | H    | H4NA | -3.82709 | -0.81663 | 3.458303 | 40   | C | C22  | -2.74446 | 0.40687  | -1.03862 |
| 10 | H    | H4NB | -2.30865 | -0.02075 | 3.761442 | 41   | H | H22  | -2.70119 | 0.588787 | -2.10492 |
| 11 | N    | N5   | -5.76591 | -1.43335 | -0.07328 | 42   | C | C23  | -0.78869 | 1.033579 | 2.115726 |
| 12 | C    | C1   | 3.009439 | 0.886389 | 0.209311 | 43   | C | C24  | -5.14073 | -1.25884 | 1.164609 |
| 13 | C    | C2   | 1.913056 | 1.761207 | 0.033146 | 44   | C | C25  | -5.01777 | -0.87302 | -1.12202 |
| 14 | C    | C3   | 0.8073   | 1.010802 | -0.4572  | 45   | C | C26  | -7.03856 | -2.11092 | -0.2523  |
| 15 | C    | C4   | 1.206556 | -0.35218 | -0.58738 | 46   | H | H26A | -7.25389 | -2.13057 | -1.3189  |
| 16 | C    | C5   | 0.434211 | -1.38998 | -1.10271 | 47   | H | H26B | -7.83326 | -1.57831 | 0.272806 |
| 17 | H    | H5   | -0.57156 | -1.1288  | -1.41361 | 48   | H | H8   | -6.98413 | -3.13042 | 0.13244  |
| 18 | C    | C6   | 0.770973 | -2.72829 | -1.28115 | 49   | C | C27  | 4.318698 | -3.88938 | -0.31146 |
| 19 | H    | H6   | -0.0163  | -3.35039 | -1.69829 | 50   | H | H3   | 3.95954  | -4.86309 | -0.66249 |
| 20 | C    | C7   | 1.967673 | -3.38822 | -1.00955 | 51   | C | C28  | 5.545644 | -3.51822 | -1.1637  |
| 21 | H    | H7   | 1.962464 | -4.45039 | -1.24218 | 52   | H | H1   | 6.31076  | -4.29581 | -1.08644 |
| 22 | C    | C8   | 3.170089 | -2.89443 | -0.49546 | 53   | H | H10  | 5.997523 | -2.57986 | -0.83265 |
| 23 | C    | C9   | 3.427107 | -1.56277 | -0.13998 | 54   | H | H11  | 5.282043 | -3.40953 | -2.21885 |
| 24 | H    | H9   | 4.425266 | -1.35783 | 0.226047 | 55   | C | C29  | 4.700313 | -4.04635 | 1.171192 |
| 25 | C    | C10  | 2.612898 | -0.43229 | -0.16908 | 56   | H | H4   | 5.481029 | -4.80381 | 1.284802 |
| 26 | C    | C11  | 4.353861 | 1.224594 | 0.702481 | 57   | H | H12  | 3.842749 | -4.35512 | 1.774857 |
| 27 | C    | C12  | 5.819161 | 2.947957 | 1.376669 | 58   | H | H13  | 5.083201 | -3.11136 | 1.588464 |
| 28 | H    | H12A | 6.035706 | 2.481958 | 2.338381 | 59   | C | C30  | 1.862579 | 3.206927 | 0.413193 |
| 29 | H    | H12B | 5.769508 | 4.029755 | 1.476603 | 60   | H | H2   | 2.269219 | 3.350429 | 1.413907 |
| 30 | H    | H12C | 6.591468 | 2.663544 | 0.66117  | 61   | H | H14  | 0.844408 | 3.592542 | 0.397156 |
| 31 | C    | C13  | -0.52225 | 1.528518 | -0.75447 | 62   | H | H15  | 2.466719 | 3.8115   | -0.26731 |

**Table S9.** Cartesian coordinates of **4d**; absolute energy is -1499.52896 au.

|    | Atom | X    | Y        | Z        |          | Atom | X | Y    | Z        |          |          |
|----|------|------|----------|----------|----------|------|---|------|----------|----------|----------|
| 1  | O    | O1   | 6.116366 | 0.922642 | -0.41708 | 26   | C | C11  | 5.349074 | -0.02265 | -0.50964 |
| 2  | O    | O3   | -5.17428 | 1.49252  | -1.64946 | 27   | C | C13  | 0.539194 | -1.37931 | 0.236938 |
| 3  | O    | O4   | -4.54599 | -0.57712 | 2.403622 | 28   | C | C14  | 0.568716 | -2.73991 | 0.462977 |
| 4  | N    | N1   | 2.651027 | -4.02002 | 1.299817 | 29   | C | C15  | 1.730797 | -3.43188 | 0.920701 |
| 5  | N    | N2   | -1.47195 | -4.27543 | 0.06496  | 30   | C | C16  | -0.57093 | -3.57349 | 0.243213 |
| 6  | N    | N3   | 0.80729  | 0.051101 | -3.17554 | 31   | C | C17  | -0.78639 | -0.76526 | -0.08382 |
| 7  | N    | N4   | -2.44556 | 1.112828 | -2.84455 | 32   | C | C18  | -0.9766  | -0.10952 | -1.32047 |
| 8  | H    | H4NA | -3.36764 | 1.471683 | -3.04228 | 33   | C | C19  | -2.22971 | 0.488463 | -1.66818 |
| 9  | H    | H4NB | -1.74415 | 1.13033  | -3.56666 | 34   | C | C20  | -3.23333 | 0.395054 | -0.69414 |
| 10 | N    | N5   | -5.20979 | 0.527719 | 0.467439 | 35   | C | C21  | -3.03198 | -0.24971 | 0.514901 |
| 11 | C    | C1   | 3.929991 | 0.070122 | -0.10227 | 36   | C | C22  | -1.83086 | -0.84626 | 0.850222 |
| 12 | C    | C2   | 3.003922 | -0.96966 | -0.18002 | 37   | H | H22  | -1.69811 | -1.34991 | 1.799415 |
| 13 | H    | H2   | 3.219751 | -1.95454 | -0.56668 | 38   | C | C23  | 0.051858 | -0.04681 | -2.30509 |
| 14 | C    | C3   | 1.726986 | -0.54927 | 0.252698 | 39   | C | C24  | -4.62389 | 0.891586 | -0.74815 |
| 15 | C    | C4   | 1.847717 | 0.825237 | 0.645902 | 40   | C | C25  | -4.31038 | -0.16124 | 1.297338 |
| 16 | C    | C5   | 0.847519 | 1.613805 | 1.213707 | 41   | C | C26  | -6.58608 | 0.824657 | 0.827803 |
| 17 | H    | H5   | -0.11215 | 1.130643 | 1.356923 | 42   | H | H26A | -6.79531 | 0.324658 | 1.771582 |
| 18 | C    | C6   | 0.893688 | 2.941973 | 1.631032 | 43   | H | H26B | -7.26378 | 0.45857  | 0.055846 |
| 19 | H    | H6   | -0.03468 | 3.332086 | 2.038408 | 44   | H | H1   | 3.934769 | 4.475101 | 1.237486 |
| 20 | C    | C7   | 1.961929 | 3.837535 | 1.599542 | 45   | H | H8   | -6.73188 | 1.900387 | 0.944016 |
| 21 | H    | H7   | 1.748368 | 4.834698 | 1.975588 | 46   | C | C12  | 5.834058 | -1.35337 | -1.05753 |
| 22 | C    | C8   | 3.265123 | 3.62334  | 1.160866 | 47   | H | H3   | 6.897155 | -1.27286 | -1.27785 |
| 23 | C    | C9   | 3.837996 | 2.458944 | 0.648856 | 48   | H | H4   | 5.29886  | -1.61675 | -1.97482 |
| 24 | H    | H9   | 4.888684 | 2.510584 | 0.387823 | 49   | H | H10  | 5.674066 | -2.16419 | -0.34123 |
| 25 | C    | C10  | 3.250921 | 1.216266 | 0.417532 |      |   |      |          |          |          |

**Table S10.** Cartesian coordinates of **4e**; absolute energy is -1439.10713 au.

|    | Atom | X    | Y        | Z        |          | Atom | X | Y    | Z        |          |          |
|----|------|------|----------|----------|----------|------|---|------|----------|----------|----------|
| 1  | O    | O3   | -4.90968 | -1.61936 | 1.538076 | 24   | C | C13  | 0.775118 | 1.429923 | -0.14667 |
| 2  | O    | O4   | -4.254   | 0.608767 | -2.42574 | 25   | C | C14  | 0.778505 | 2.791878 | -0.35043 |
| 3  | N    | N1   | 2.84354  | 4.137114 | -1.12599 | 26   | C | C15  | 1.934113 | 3.518039 | -0.77177 |
| 4  | N    | N2   | -1.30552 | 4.275972 | 0.019988 | 27   | C | C16  | -0.38558 | 3.596463 | -0.14678 |
| 5  | N    | N3   | 1.017329 | -0.14385 | 3.215066 | 28   | C | C17  | -0.53949 | 0.773228 | 0.129285 |
| 6  | N    | N4   | -2.20656 | -1.23906 | 2.789363 | 29   | C | C18  | -0.73612 | 0.065722 | 1.336501 |
| 7  | H    | H4NA | -3.12572 | -1.61946 | 2.958425 | 30   | C | C19  | -1.98337 | -0.56755 | 1.641001 |
| 8  | H    | H4NB | -1.51873 | -1.26724 | 3.524159 | 31   | C | C20  | -2.97312 | -0.45627 | 0.654326 |
| 9  | N    | N5   | -4.93002 | -0.5763  | -0.54165 | 32   | C | C21  | -2.76443 | 0.235787 | -0.52641 |
| 10 | C    | C1   | 4.174439 | 0.037209 | 0.257451 | 33   | C | C22  | -1.56972 | 0.866867 | -0.8194  |
| 11 | C    | C2   | 3.236957 | 1.065746 | 0.34663  | 34   | H | H22  | -1.43274 | 1.407701 | -1.74733 |
| 12 | H    | H2   | 3.437833 | 2.034936 | 0.778591 | 35   | C | C23  | 0.27629  | -0.01877 | 2.335703 |
| 13 | C    | C3   | 1.988051 | 0.630014 | -0.14975 | 36   | C | C24  | -4.35648 | -0.97663 | 0.668092 |
| 14 | C    | C4   | 2.148891 | -0.72455 | -0.58997 | 37   | C | C25  | -4.02938 | 0.156245 | -1.33176 |
| 15 | C    | C5   | 1.195594 | -1.52061 | -1.22006 | 38   | C | C26  | -6.29754 | -0.87739 | -0.93163 |
| 16 | H    | H5   | 0.226037 | -1.06341 | -1.38161 | 39   | H | H26A | -6.49155 | -0.36831 | -1.87376 |
| 17 | C    | C6   | 1.303865 | -2.83287 | -1.68167 | 40   | H | H26B | -6.99295 | -0.52359 | -0.16966 |
| 18 | C    | C7   | 2.397222 | -3.69673 | -1.64306 | 41   | H | H1   | 4.376084 | -4.29876 | -1.23222 |
| 19 | H    | H7   | 2.226    | -4.6836  | -2.0646  | 42   | H | H8   | -6.43359 | -1.9526  | -1.06145 |
| 20 | C    | C8   | 3.680288 | -3.46949 | -1.14854 | 43   | H | H20  | 0.404699 | -3.23745 | -2.13715 |
| 21 | C    | C9   | 4.190396 | -2.30851 | -0.57273 | 44   | C | C11  | 5.521872 | 0.085989 | 0.689222 |
| 22 | H    | H9   | 5.235101 | -2.34689 | -0.27302 | 45   | N | N6   | 6.626693 | 0.091934 | 1.031115 |
| 23 | C    | C10  | 3.549442 | -1.09942 | -0.32557 |      |   |      |          |          |          |

**Table S11.** Cartesian coordinates of **4f**; absolute energy is  $-1504.13247$  au.

|    | Atom | X    | Y        | Z        |          | Atom | X | Y    | Z        |          |          |
|----|------|------|----------|----------|----------|------|---|------|----------|----------|----------|
| 1  | O    | O3   | -4.82499 | -0.61407 | 1.871172 | 29   | C | C18  | -0.65251 | 0.968551 | 1.278006 |
| 2  | O    | O4   | -4.01665 | 0.158059 | -2.58375 | 30   | C | C19  | -1.91178 | 0.456613 | 1.72672  |
| 3  | N    | N1   | 2.990181 | 4.055577 | -2.2808  | 31   | C | C20  | -2.859   | 0.217575 | 0.722427 |
| 4  | N    | N2   | -1.1808  | 4.48891  | -1.32531 | 32   | C | C21  | -2.59951 | 0.475288 | -0.6147  |
| 5  | N    | N3   | 1.007728 | 1.420232 | 3.198126 | 33   | C | C22  | -1.3925  | 0.98468  | -1.05293 |
| 6  | N    | N4   | -2.17936 | 0.200116 | 3.025192 | 34   | H | H22  | -1.21129 | 1.184131 | -2.10143 |
| 7  | H    | H4NA | -3.10714 | -0.10574 | 3.277187 | 35   | C | C23  | 0.315927 | 1.235853 | 2.289508 |
| 8  | H    | H4NB | -1.52664 | 0.446328 | 3.751265 | 36   | C | C24  | -4.23902 | -0.29055 | 0.856562 |
| 9  | N    | N5   | -4.76021 | -0.33055 | -0.44123 | 37   | C | C25  | -3.82901 | 0.108841 | -1.39397 |
| 10 | C    | C1   | 4.331821 | 0.678725 | 0.426796 | 38   | C | C26  | -6.10566 | -0.76735 | -0.77155 |
| 11 | C    | C2   | 3.384937 | 1.634615 | 0.105216 | 39   | H | H26A | -6.66259 | 0.041828 | -1.2467  |
| 12 | H    | H2   | 3.563839 | 2.700201 | 0.140084 | 40   | H | H26B | -6.59759 | -1.05704 | 0.15509  |
| 13 | C    | C3   | 2.128761 | 1.0364   | -0.20639 | 41   | H | H1   | 4.520387 | -3.89952 | 0.695461 |
| 14 | C    | C4   | 2.304916 | -0.38062 | -0.09947 | 42   | H | H8   | -6.07306 | -1.61858 | -1.4535  |
| 15 | C    | C5   | 1.368463 | -1.3628  | -0.40773 | 43   | C | C11  | 5.744182 | 0.942367 | 0.854721 |
| 16 | H    | H5   | 0.413371 | -0.98744 | -0.75808 | 44   | H | H3   | 6.470905 | 0.476288 | 0.180875 |
| 17 | C    | C6   | 1.442542 | -2.76224 | -0.3461  | 45   | H | H4   | 5.943275 | 0.560763 | 1.861589 |
| 18 | C    | C7   | 2.558836 | -3.50886 | 0.051881 | 46   | H | H10  | 5.9515   | 2.013535 | 0.863812 |
| 19 | H    | H7   | 2.419565 | -4.58661 | 0.04808  | 47   | C | C12  | 0.180519 | -3.53988 | -0.73558 |
| 20 | C    | C8   | 3.829674 | -3.09954 | 0.443768 | 48   | H | H11  | -0.55571 | -2.80344 | -1.07394 |
| 21 | C    | C9   | 4.344771 | -1.80755 | 0.544186 | 49   | C | C27  | 0.4221   | -4.50625 | -1.90856 |
| 22 | H    | H9   | 5.385494 | -1.74069 | 0.851447 | 50   | H | H6   | 1.108829 | -5.31343 | -1.6384  |
| 23 | C    | C10  | 3.712617 | -0.59486 | 0.307508 | 51   | H | H13  | 0.841701 | -3.98684 | -2.77363 |
| 24 | C    | C13  | 0.9255   | 1.770009 | -0.51222 | 52   | H | H14  | -0.51845 | -4.97012 | -2.2181  |
| 25 | C    | C14  | 0.923794 | 2.999902 | -1.14753 | 53   | C | C28  | -0.43045 | -4.2736  | 0.471952 |
| 26 | C    | C15  | 2.079422 | 3.569215 | -1.75991 | 54   | H | H12  | 0.246958 | -5.03823 | 0.86314  |
| 27 | C    | C16  | -0.25058 | 3.806905 | -1.24041 | 55   | H | H15  | -1.3591  | -4.77435 | 0.184472 |
| 28 | C    | C17  | -0.40242 | 1.227515 | -0.08725 | 56   | H | H16  | -0.65813 | -3.58315 | 1.287876 |



**Table S12.** Cartesian coordinates of **4g**; absolute energy is  $-1543.45314$  au.

|    | Atom | X    | Y        | Z        |          | Atom | X | Y    | Z        |          |          |
|----|------|------|----------|----------|----------|------|---|------|----------|----------|----------|
| 1  | O    | O3   | -5.02319 | -0.20019 | 1.948242 | 31   | C | C20  | -3.01053 | 0.44123  | 0.755084 |
| 2  | O    | O4   | -4.21243 | 0.387039 | -2.53502 | 32   | C | C21  | -2.752   | 0.641209 | -0.59208 |
| 3  | N    | N1   | 3.118599 | 3.656911 | -2.42323 | 33   | C | C22  | -1.5131  | 1.034351 | -1.06106 |
| 4  | N    | N2   | -0.96952 | 4.51475  | -1.37286 | 34   | H | H22  | -1.33115 | 1.189225 | -2.11694 |
| 5  | N    | N3   | 0.989628 | 1.372659 | 3.1381   | 35   | C | C23  | 0.266464 | 1.223474 | 2.247663 |
| 6  | N    | N4   | -2.30047 | 0.431874 | 3.048206 | 36   | C | C24  | -4.42459 | 0.049387 | 0.920149 |
| 7  | H    | H4NA | -3.24633 | 0.209287 | 3.319784 | 37   | C | C25  | -4.01781 | 0.354133 | -1.34589 |
| 8  | H    | H4NB | -1.61822 | 0.638903 | 3.759118 | 38   | C | C26  | -6.34732 | -0.33289 | -0.65828 |
| 9  | N    | N5   | -4.96766 | 0.016556 | -0.36723 | 39   | H | H26A | -6.50185 | -0.20194 | -1.72776 |
| 10 | C    | C1   | 4.182318 | 0.199781 | 0.290243 | 40   | H | H26B | -7.02685 | 0.315509 | -0.1038  |
| 11 | C    | C2   | 3.325001 | 1.239252 | -0.02212 | 41   | H | H1   | 3.908399 | -4.36887 | 0.665054 |
| 12 | H    | H2   | 3.603458 | 2.282346 | -0.01937 | 42   | H | H8   | -6.54858 | -1.37032 | -0.38419 |
| 13 | C    | C3   | 2.004636 | 0.764749 | -0.28246 | 43   | C | C11  | 5.638506 | 0.304809 | 0.657833 |
| 14 | C    | C4   | 2.038488 | -0.65964 | -0.14561 | 44   | H | H3   | 6.23398  | -0.26828 | -0.065   |
| 15 | C    | C5   | 0.996494 | -1.54792 | -0.39646 | 45   | H | H4   | 5.80418  | -0.18548 | 1.625827 |
| 16 | H    | H5   | 0.071939 | -1.0857  | -0.72235 | 46   | C | C12  | 6.180398 | 1.734374 | 0.726609 |
| 17 | C    | C6   | 0.927192 | -2.94484 | -0.30048 | 47   | H | H10  | 7.239659 | 1.727858 | 0.994231 |
| 18 | C    | C7   | 1.974357 | -3.79471 | 0.079643 | 48   | H | H11  | 5.654952 | 2.326825 | 1.480345 |
| 19 | H    | H7   | 1.726451 | -4.85241 | 0.111929 | 49   | H | H12  | 6.086539 | 2.251021 | -0.2323  |
| 20 | C    | C8   | 3.293194 | -3.50858 | 0.416054 | 50   | C | C27  | -0.41784 | -3.59512 | -0.64119 |
| 21 | C    | C9   | 3.941618 | -2.27404 | 0.465232 | 51   | H | H13  | -1.10513 | -2.78472 | -0.90536 |
| 22 | H    | H9   | 4.994397 | -2.31258 | 0.73332  | 52   | C | C28  | -1.02771 | -4.3303  | 0.565242 |
| 23 | C    | C10  | 3.430247 | -1.00736 | 0.220708 | 53   | H | H14  | -0.42294 | -5.19069 | 0.865804 |
| 24 | C    | C13  | 0.876847 | 1.613002 | -0.57468 | 54   | H | H15  | -2.02508 | -4.70437 | 0.317953 |
| 25 | C    | C14  | 0.983791 | 2.829078 | -1.22882 | 55   | H | H16  | -1.12023 | -3.66955 | 1.430693 |
| 26 | C    | C15  | 2.175306 | 3.272657 | -1.87532 | 56   | C | C29  | -0.32228 | -4.51635 | -1.86977 |
| 27 | C    | C16  | -0.10761 | 3.746491 | -1.30508 | 57   | H | H6   | 0.327157 | -5.3772  | -1.68725 |
| 28 | C    | C17  | -0.48996 | 1.212538 | -0.11615 | 58   | H | H17  | 0.071182 | -3.98188 | -2.73789 |
| 29 | C    | C18  | -0.7393  | 1.014614 | 1.259022 | 59   | H | H18  | -1.31082 | -4.90334 | -2.13276 |
| 30 | C    | C19  | -2.03101 | 0.627286 | 1.739531 |      |   |      |          |          |          |

#### 4. ORTEP Drawing of 2b (Figures S99).

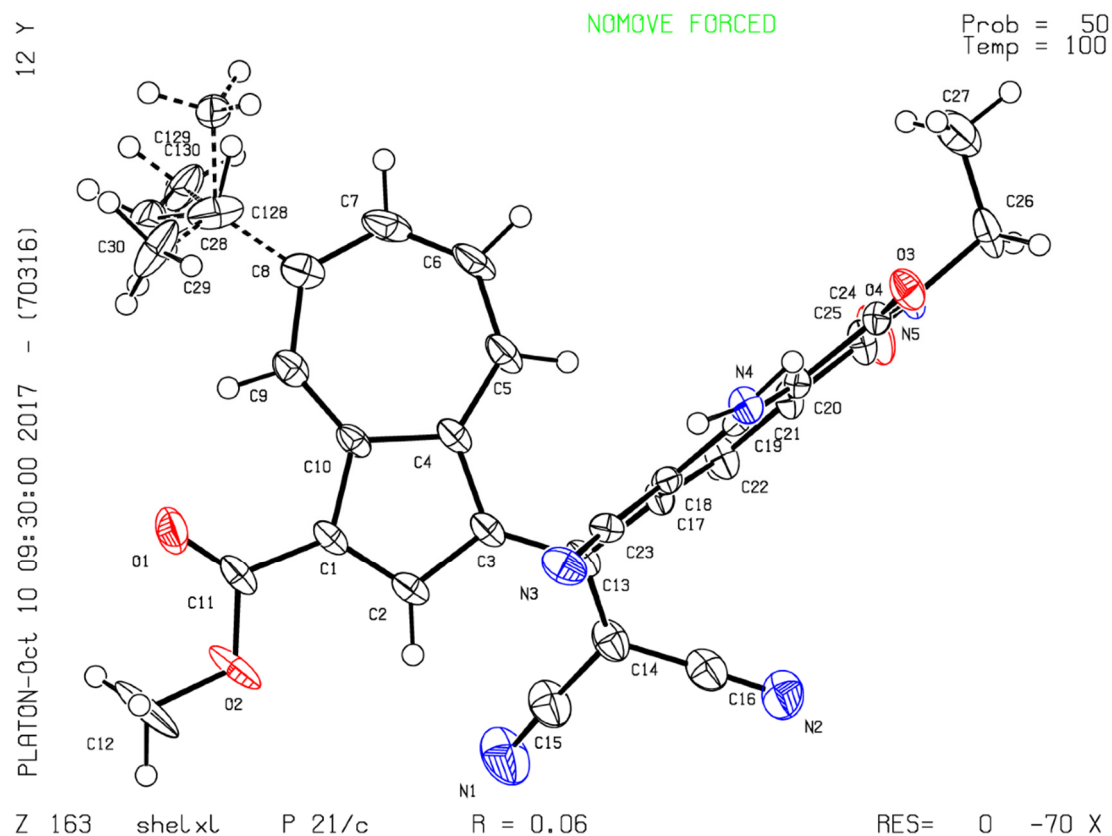

**Figure S99.** ORTEP diagrams of **2b** (CCDC 1579069); ellipsoids are drawn at the 50% probability level; recrystallized from CH<sub>2</sub>Cl<sub>2</sub>/MeOH; monoclinic, P2<sub>1</sub>/c (#14), a = 15.1789(4) Å, b = 11.1406(3) Å, c = 15.2829(5) Å, β = 96.945(3)°, V = 2565.41(13) Å<sup>3</sup>, Z = 4, D<sub>calc</sub> = 1.340 g/cm<sup>3</sup>, μ(MoKa) = 0.915 cm<sup>-1</sup>, R<sub>1</sub> (I > 2.00σ) = 0.0572, R (All reflections) = 0.0776, wR<sup>2</sup> (All reflections) = 0.1321.
